# Supplementary material
Source: MDPI journal article supplement (https://www.mdpi.com/1424-8247/16/9/1196)
Supplement: s1 [file s1]

## Investigational Product (IP) Compliance

### Summary Table\*

| Treatment<br>Random<br>No. | Participant<br>name | IP<br>dispensed,<br>capsules | IP returned,<br>capsules | IP<br>consumed,<br>capsules | Compliance,<br>% | Treatment<br>group* | KJ group A<br>Compliance, % | Placebo group B<br>Compliance, % |
|----------------------------|---------------------|------------------------------|--------------------------|-----------------------------|------------------|---------------------|-----------------------------|----------------------------------|
| 1                          | TI_MC               | 90                           | 6                        | 84                          | 100              | A                   | 100                         |                                  |
| 2                          | NI_BA               | 90                           | 6                        | 84                          | 100              | A                   | 100                         |                                  |
| 3                          | NI_GO               | 90                           | 6                        | 84                          | 100              | A                   | 100                         |                                  |
| 4                          | MA_NE               | 90                           | 6                        | 84                          | 100              | A                   | 100                         |                                  |
| 5                          | NI_DE               | 90                           | 6                        | 84                          | 100              | B                   |                             | 100                              |
| 6                          | NI_TA               | 90                           | 84                       | 6                           | 100              | A                   | 7                           |                                  |
| 7                          | NA_MI               | 90                           | 6                        | 84                          | 100              | B                   |                             | 100                              |
| 8                          | NA_AB               | 90                           | 48                       | 42                          | 100              | B                   |                             | 50                               |
| 9                          | MA_TI               | 90                           | 48                       | 42                          | 100              | B                   |                             | 50                               |
| 10                         | NA_GO               | 90                           | 54                       | 36                          | 100              | B                   |                             | 43                               |
| 11                         | OL_KH               | 90                           | 48                       | 42                          | 100              | B                   |                             | 50                               |
| 12                         | GO_MA               | 90                           | 6                        | 84                          | 100              | B                   |                             | 100                              |
| 13                         | NA_AK               | 90                           | 6                        | 84                          | 100              | A                   | 100                         |                                  |
| 14                         | GI_GI               | 90                           | 48                       | 42                          | 100              | B                   |                             | 50                               |
| 15                         | RE_KA               | 90                           | 48                       | 42                          | 100              | B                   |                             | 50                               |
| 16                         | LE_JI               | 90                           | 6                        | 84                          | 100              | B                   |                             | 100                              |
| 17                         | TI_MC               | 90                           | 6                        | 84                          | 100              | B                   |                             | 100                              |
| 18                         | NI_BA               | 90                           | 6                        | 84                          | 100              | B                   |                             | 100                              |
| 19                         | NI_GO               | 90                           | 6                        | 84                          | 100              | B                   |                             | 100                              |
| 20                         | MA_NE               | 90                           | 6                        | 84                          | 100              | A                   | 100                         |                                  |

\* - Dropout patients are highlighted on gray background

Effect of Kan-Jang® supplementation in Patients Diagnosed With COVID-19: A Randomized, Quadruple-blind, Placebo-controlled Trial

Protocol number SHIRD-2021-2

Version: Final

2021-02-1

| <b>Treatment<br/>Random<br/>No.</b> | <b>Participant<br/>name</b> | <b>IP<br/>dispensed,<br/>capsules</b> | <b>IP returned,<br/>capsules</b> | <b>IP<br/>consumed,<br/>capsules</b> | <b>Compliance,<br/>%</b> | <b>Treatment<br/>group*</b> | <b>KJ group A<br/>Compliance,<br/>%</b> | <b>Placebo group<br/>B<br/>Compliance,<br/>%</b> |
|-------------------------------------|-----------------------------|---------------------------------------|----------------------------------|--------------------------------------|--------------------------|-----------------------------|-----------------------------------------|--------------------------------------------------|
| 21                                  | MA_GU                       | 90                                    | 48                               | 42                                   | 100                      | A                           | 50                                      |                                                  |
| 22                                  | OT_KH                       | 90                                    | 6                                | 84                                   | 100                      | A                           | 100                                     |                                                  |
| 23                                  | MA_DA                       | 90                                    | 6                                | 84                                   | 100                      | A                           | 100                                     |                                                  |
| 24                                  | SA_BA                       | 90                                    | 6                                | 84                                   | 100                      | B                           |                                         | 100                                              |
| 25                                  | TA_PA                       | 90                                    | 6                                | 84                                   | 100                      | B                           |                                         | 100                                              |
| 26                                  | LE_BI                       | 90                                    | 6                                | 84                                   | 100                      | B                           |                                         | 100                                              |
| 27                                  | NA_BI                       | 90                                    | 48                               | 42                                   | 100                      | A                           | 50                                      |                                                  |
| 28                                  | TA_GZ                       | 90                                    | 6                                | 84                                   | 100                      | A                           | 100                                     |                                                  |
| 29                                  | DA_KA                       | 90                                    | 48                               | 42                                   | 100                      | A                           | 50                                      |                                                  |
| 30                                  | GI_GE                       | 90                                    | 6                                | 84                                   | 100                      | B                           |                                         | 100                                              |
| 31                                  | NU_AB                       | 90                                    | 6                                | 84                                   | 100                      | B                           |                                         | 100                                              |
| 32                                  | MI_AB                       | 90                                    | 12                               | 78                                   | 100                      | B                           |                                         | 93                                               |
| 33                                  | NI_GE                       | 90                                    | 6                                | 84                                   | 100                      | B                           |                                         | 100                                              |
| 34                                  | NI_GV                       | 90                                    | 6                                | 84                                   | 100                      | B                           |                                         | 100                                              |
| 35                                  | EL_KA                       | 90                                    | 84                               | 6                                    | 100                      | B                           |                                         | 7                                                |
| 36                                  | BE_KE                       | 90                                    | 6                                | 84                                   | 100                      | A                           | 100                                     |                                                  |
| 37                                  | IN_GR                       | 90                                    | 6                                | 84                                   | 100                      | B                           |                                         | 100                                              |
| 38                                  | GI_CH                       | 90                                    | 6                                | 84                                   | 100                      | A                           | 100                                     |                                                  |
| 39                                  | LE_TA                       | 90                                    | 6                                | 84                                   | 100                      | A                           | 100                                     |                                                  |
| 40                                  | FI_KH                       | 90                                    | 42                               | 48                                   | 100                      | A                           | 57                                      |                                                  |

\* - Dropout patients are highlighted on gray background

| Treatment Random No. | Participant name | IP dispensed, capsules | IP returned, capsules | IP consumed, capsules | Compliance, % | Treatment group* | KJ group A Compliance, % | Placebo group B Compliance, % |
|----------------------|------------------|------------------------|-----------------------|-----------------------|---------------|------------------|--------------------------|-------------------------------|
| 41                   | TA_SH            | 90                     | 74                    | 16                    | 100           | B                |                          | 19                            |
| 42                   | SO_TO            | 90                     | 6                     | 84                    | 100           | B                |                          | 100                           |
| 43                   | IR_JA            | 90                     | 6                     | 84                    | 100           | B                |                          | 100                           |
| 44                   | IA_MA            | 90                     | 6                     | 84                    | 100           | B                |                          | 100                           |
| 45                   | KE_RI            | 90                     | 6                     | 84                    | 100           | B                |                          | 100                           |
| 46                   | MU_AB            | 90                     | 6                     | 84                    | 100           | B                |                          | 100                           |
| 47                   | RO_AB            | 90                     | 6                     | 84                    | 100           | A                | 100                      |                               |
| 48                   | GI_SO            | 90                     | 6                     | 84                    | 100           | B                |                          | 100                           |
| 49                   | LI_ZA            | 90                     | 6                     | 84                    | 100           | B                |                          | 100                           |
| 50                   | NA_RO            | 90                     | 6                     | 84                    | 100           | B                |                          | 100                           |
| 51                   | NI_BR            | 90                     | 62                    | 18                    | 112.5         | B                |                          | 21                            |
| 52                   | IA_KU            | 90                     | 62                    | 18                    | 112.5         | B                |                          | 21                            |
| 53                   | MZ_SI            | 90                     | 62                    | 18                    | 112.5         | B                |                          | 21                            |
| 54                   | AM_KE            | 90                     | 62                    | 18                    | 112.5         | B                |                          | 21                            |
| 55                   | ZA_KU            | 90                     | 6                     | 84                    | 100           | B                |                          | 100                           |
| 56                   | DE_CH            | 90                     | 6                     | 84                    | 100           | A                | 100                      |                               |
| 57                   | DA_KV            | 90                     | 6                     | 84                    | 100           | B                |                          | 100                           |
| 58                   | NI_NI            | 90                     | 6                     | 84                    | 100           | A                | 100                      |                               |
| 59                   | IL_ME            | 90                     | 6                     | 84                    | 100           | A                | 100                      |                               |
| 60                   | DA_GO            | 90                     | 6                     | 84                    | 100           | B                |                          | 100                           |

\* - Dropout patients are highlighted on gray background

| Treatment<br>Random<br>No. | Participant<br>name | IP<br>dispensed,<br>capsules | IP returned,<br>capsules | IP<br>consumed,<br>capsules | Compliance,<br>% | Treatment<br>group* | KJ group A<br>Compliance,<br>% | Placebo group<br>B<br>Compliance,<br>% |
|----------------------------|---------------------|------------------------------|--------------------------|-----------------------------|------------------|---------------------|--------------------------------|----------------------------------------|
| 61                         | TA_RE               | 90                           | 6                        | 84                          | 100              | A                   | 100                            |                                        |
| 62                         | EK_GE               | 90                           | 6                        | 84                          | 100              | B                   |                                | 100                                    |
| 63                         | BE_VA               | 90                           | 6                        | 84                          | 100              | A                   | 100                            |                                        |
| 64                         | MA_CH               | 90                           | 6                        | 84                          | 100              | B                   |                                | 100                                    |
| 65                         | GI_UG               | 90                           | 6                        | 84                          | 100              | B                   |                                | 100                                    |
| 66                         | IN_SU               | 90                           | 6                        | 84                          | 100              | B                   |                                | 100                                    |
| 67                         | TA_KA               | 90                           | 6                        | 84                          | 100              | B                   |                                | 100                                    |
| 68                         | TE_MO               | 90                           | 6                        | 84                          | 100              | B                   |                                | 100                                    |
| 69                         | TE_SI               | 90                           | 6                        | 84                          | 100              | A                   | 100                            |                                        |
| 70                         | TA_BA               | 90                           | 6                        | 84                          | 100              | B                   |                                | 100                                    |
| 71                         | DE_SI               | 90                           | 48                       | 42                          | 100              | B                   |                                | 50                                     |
| 72                         | NA_NA               | 90                           | 48                       | 42                          | 100              | B                   |                                | 50                                     |
| 73                         | MA_KA               | 90                           | 6                        | 84                          | 100              | A                   | 100                            |                                        |
| 74                         | NI_BA               | 90                           | 6                        | 84                          | 100              | A                   | 100                            |                                        |
| 75                         | TE_GE               | 90                           | 42                       | 48                          | 100              | B                   |                                | 57                                     |
| 76                         | NA_KA               | 90                           | 6                        | 84                          | 100              | A                   | 100                            |                                        |
| 77                         | TA_BU               | 90                           | 6                        | 84                          | 100              | A                   | 100                            |                                        |
| 78                         | NA_ZA               | 90                           | 6                        | 84                          | 100              | A                   | 100                            |                                        |
| 79                         | AN_AL               | 90                           | 54                       | 36                          | 100              | A                   | 43                             |                                        |
| 80                         | MA_AS               | 90                           | 6                        | 84                          | 100              | A                   | 100                            |                                        |

\* - Dropout patients are highlighted on gray background

| Treatment<br>Random<br>No. | Participant<br>name | IP<br>dispensed,<br>capsules | IP returned,<br>capsules | IP<br>consumed,<br>capsules | Compliance,<br>% | Treatment<br>group* | KJ group A<br>Compliance, % | Placebo group B<br>Compliance, % |
|----------------------------|---------------------|------------------------------|--------------------------|-----------------------------|------------------|---------------------|-----------------------------|----------------------------------|
| 81                         | TI_LO               | 90                           | 6                        | 84                          | 100              | B                   |                             | 100                              |
| 82                         | LI_LO               | 90                           | 6                        | 84                          | 100              | B                   |                             | 100                              |
| 83                         | LI_KA               | 90                           | 6                        | 84                          | 100              | A                   | 100                         |                                  |
| 84                         | SH_VA               | 90                           | 6                        | 84                          | 100              | A                   | 100                         |                                  |
| 85                         | NI_VA               | 90                           | 6                        | 84                          | 100              | B                   |                             | 100                              |
| 86                         | SH_PO               | 90                           | 6                        | 84                          | 100              | A                   | 100                         |                                  |
| 87                         | NI_MO               | 90                           | 6                        | 84                          | 100              | A                   | 100                         |                                  |
| 88                         | TE_UK               | 90                           | 6                        | 84                          | 100              | B                   |                             | 100                              |
| 89                         | NI_CH               | 90                           | 6                        | 84                          | 100              | A                   | 100                         |                                  |
| 90                         | GI_CH               | 90                           | 6                        | 84                          | 100              | A                   | 100                         |                                  |
| 91                         | TA_KA               | 90                           | 6                        | 84                          | 100              | A                   | 100                         |                                  |
| 92                         | AN_VA               | 90                           | 6                        | 84                          | 100              | B                   |                             | 100                              |
| 93                         | AN_KH               | 90                           | 6                        | 84                          | 100              | A                   | 100                         |                                  |
| 94                         | SH_KA               | 90                           | 6                        | 84                          | 100              | A                   | 100                         |                                  |
| 95                         | LA_CH               | 90                           | 6                        | 84                          | 100              | A                   | 100                         |                                  |
| 96                         | TA_JO               | 90                           | 6                        | 84                          | 100              | B                   |                             | 100                              |
| 97                         | MA_TE               | 90                           | 6                        | 84                          | 100              | A                   | 100                         |                                  |
| 98                         | GI_SO               | 90                           | 6                        | 84                          | 100              | A                   | 100                         |                                  |
| 99                         | IZ_LA               | 90                           | 6                        | 84                          | 100              | A                   | 100                         |                                  |
| 100                        | GR_GU               | 90                           | 6                        | 84                          | 100              | A                   | 100                         |                                  |

\* - Dropout patients are highlighted on gray background

| Treatment<br>Random<br>No. | Participant<br>name | IP<br>dispensed,<br>capsules | IP returned,<br>capsules | IP<br>consumed,<br>capsules | Compliance,<br>% | Treatment<br>group* | KJ group A<br>Compliance, % | Placebo group B<br>Compliance, % |
|----------------------------|---------------------|------------------------------|--------------------------|-----------------------------|------------------|---------------------|-----------------------------|----------------------------------|
| 101                        | NI_OT               | 90                           | 6                        | 84                          | 100              | A                   | 100                         |                                  |
| 102                        | SH_MU               | 90                           | 6                        | 84                          | 100              | A                   | 100                         |                                  |
| 103                        | MA_KU               | 90                           | 6                        | 84                          | 100              | B                   |                             | 100                              |
| 104                        | GI_KA               | 90                           | 6                        | 84                          | 100              | A                   | 100                         |                                  |
| 105                        | KE_MO               | 90                           | 6                        | 84                          | 100              | B                   |                             | 100                              |
| 106                        | SA_OR               | 90                           | 54                       | 36                          | 100              | B                   |                             | 43                               |
| 107                        | LE_OR               | 90                           | 54                       | 36                          | 100              | B                   |                             | 43                               |
| 108                        | NA_OR               | 90                           | 54                       | 36                          | 100              | B                   |                             | 43                               |
| 109                        | TA_KU               | 90                           | 6                        | 84                          | 100              | B                   |                             | 100                              |
| 110                        | NU_GU               | 90                           | 6                        | 84                          | 100              | B                   |                             | 100                              |
| 111                        | NA_GU               | 90                           | 6                        | 84                          | 100              | A                   | 100                         |                                  |
| 112                        | NA_ME               | 90                           | 6                        | 84                          | 100              | B                   |                             | 100                              |
| 113                        | TO_KE               | 90                           | 6                        | 84                          | 100              | B                   |                             | 100                              |
| 114                        | AL_NA               | 90                           | 6                        | 84                          | 100              | A                   | 100                         |                                  |
| 115                        | NI_NA               | 90                           | 6                        | 84                          | 100              | B                   |                             | 100                              |
| 116                        | TI_BA               | 90                           | 6                        | 84                          | 100              | A                   | 100                         |                                  |
| 117                        | MZ_KA               | 90                           | 6                        | 84                          | 100              | A                   | 100                         |                                  |
| 118                        | VL_BA               | 90                           | 6                        | 84                          | 100              | B                   |                             | 100                              |
| 119                        | GI_KA               | 90                           | 6                        | 84                          | 100              | B                   |                             | 100                              |
| 120                        | TI_NE               | 90                           | 54                       | 36                          | 100              | B                   |                             | 43                               |

\* - Dropout patients are highlighted on gray background

| Treatment Random No.                                                | Participant name | IP dispensed, capsules | IP returned, capsules | IP consumed, capsules | Compliance, % | Treatment group* | KJ group A Compliance, % | Placebo group B Compliance, % |
|---------------------------------------------------------------------|------------------|------------------------|-----------------------|-----------------------|---------------|------------------|--------------------------|-------------------------------|
| 121                                                                 | NE_SA            | 90                     | 54                    | 36                    | 100           | A                | 43                       |                               |
| 122                                                                 | KR_SA            | 90                     | 54                    | 36                    | 100           | B                |                          | 43                            |
| 123                                                                 | TA_GE            | 90                     | 6                     | 84                    | 100           | A                | 100                      |                               |
| 124                                                                 | MA_GE            | 90                     | 54                    | 36                    | 100           | A                | 43                       |                               |
| 125                                                                 | NA_LA            | 90                     | 54                    | 36                    | 100           | A                | 43                       |                               |
| 126                                                                 | TA_KH            | 90                     | 6                     | 84                    | 100           | B                |                          | 100                           |
| 127                                                                 | NI_KA            | 90                     | 6                     | 84                    | 100           | A                | 100                      |                               |
| 128                                                                 | NA_GA            | 90                     | 54                    | 36                    | 100           | A                | 43                       |                               |
| 129                                                                 | EK_GE            | 90                     | 6                     | 84                    | 100           | B                |                          | 100                           |
| 130                                                                 | MA_AR            | 90                     | 6                     | 84                    | 100           | A                | 100                      |                               |
| 131                                                                 | LE_BA            | 90                     | 6                     | 84                    | 100           | B                |                          | 100                           |
| 132                                                                 | MA_KV            | 90                     | 6                     | 84                    | 100           | A                | 100                      |                               |
| 133                                                                 | KN_TO            | 90                     | 6                     | 84                    | 100           | A                | 100                      |                               |
| 134                                                                 | IO_GA            | 90                     | 6                     | 84                    | 100           | A                | 100                      |                               |
| 135                                                                 | KH_KA            | 90                     | 6                     | 84                    | 100           | A                | 100                      |                               |
| 136                                                                 | LA_NA            | 90                     | 6                     | 84                    | 100           | A                | 100                      |                               |
| 137                                                                 | TA_TU            | 90                     | 54                    | 36                    | 100           | A                | 43                       |                               |
| 138                                                                 | DI_ON            | 90                     | 54                    | 36                    | 100           | A                | 43                       |                               |
| 139                                                                 | EK_ON            | 90                     | 54                    | 36                    | 100           | A                | 43                       |                               |
| 140                                                                 | EK_DE            | 90                     | 6                     | 84                    | 100           | A                | 100                      |                               |
| ITT analysis: medication compliance, %, mean ± SD, n – 140 patients |                  |                        |                       |                       |               |                  | 89.0±2.8                 | 82.0±3.4                      |
| Significance of difference Kan Jang vs placebo, <i>p</i> value      |                  |                        |                       |                       |               |                  | 0.2887 <sup>ns</sup>     |                               |
| IPP analysis: medication compliance, %, mean ± SD, n – 100 patients |                  |                        |                       |                       |               |                  | 100                      | 100                           |
| Significance of difference Kan Jang vs placebo, <i>p</i> value      |                  |                        |                       |                       |               |                  | ns                       |                               |

Principal Investigator  Study Monitor 

Effect of Kan-Jang® supplementation in Patients Diagnosed With COVID-19: A Randomized, Quadruple-blind, Placebo-controlled Trial

Protocol number SHIRD-2021-2

Version: Final

2021-02-1

(Date, Signature) Prof. Levan Ratiani, PhD, MD

Prof. Areg Hovhannisyan
