# Supplementary material
Source: MDPI journal article supplement (https://www.mdpi.com/1424-8247/16/9/1196)
Supplement: s1 [file s1]

# The rate of cases turning to severe

- The Rate of Patients with Clinical Deterioration and Duration of Hospitalization in the Treatment Group and Control Group
- In Kan Jang<sup>®</sup>, Group A of 68 patients, 12 were dropouts, and three were withdrawn from the study due to lack of efficacy and disease progression; they continued the treatment with steroids and antibiotics. Figure 1.
- In Placebo Group B, of 72 patients, 16 were dropouts, and ten were withdrawn from the study due to lack of efficacy and disease progression; they continued the treatment with steroids and antibiotics. Figure 1.
- Therefore:
  - Group A's (Kan Jang, 56 patients) disease progression rate (5.36%).
  - Group B's (placebo, 56 patients) disease progression rate (17.86%).
- Where  $p = 0.0176$  (significant result) at 95% significance level (Confidence 95%), power 90.15%.
- Absolute risk reduction by Kan Jang treatment is 12.5% ( $ARR=0.125$ ),
- Relative risk/odds ratio = 0.3
- Relative risk reduction ( $RRR, \%$ ) = 70 %.
- The number of patients required to treat with Kan Jang to prevent one additional bad outcome (defined as the Number Needed to Treat,  $NNT = 1/ARR = 8$ ) comprises 8.
- The higher ARR and lower NNT are, the more effective the intervention is.
- [Relative risk, relative and absolute risk reduction, number needed to treat and confidence intervals - Smart Health Choices - NCBI Bookshelf \(nih.gov\)](#)

# The rate of cases turning to severe

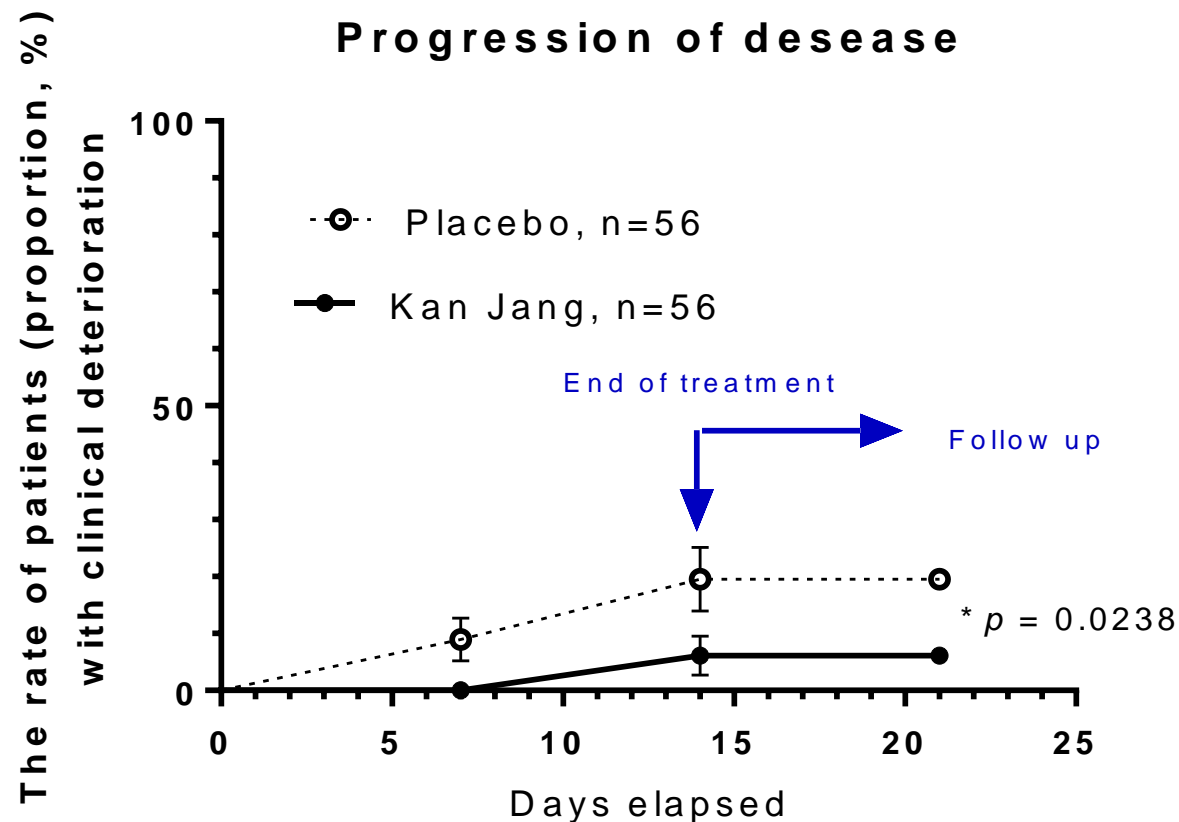

| Comparison of Survival Curves          |                   |                             |
|----------------------------------------|-------------------|-----------------------------|
| Log-rank (Mantel-Cox) test             |                   |                             |
| Chi square                             | 4,648             |                             |
| df                                     | 1                 |                             |
| P value                                | 0,0311            |                             |
| P value summary                        | *                 |                             |
| Are the survival curves sig different? | Yes               |                             |
| Gehan-Breslow-Wilcoxon test            |                   |                             |
| Chi square                             | 5,112             |                             |
| df                                     | 1                 |                             |
| P value                                | 0,0238            |                             |
| P value summary                        | *                 |                             |
| Are the survival curves sig different? | Yes               |                             |
| Median survival                        |                   |                             |
| Kan Jang, n=34                         | Undefined         |                             |
| Placebo, n=52                          | Undefined         |                             |
| Hazard Ratio (Mantel-Haenszel)         |                   |                             |
| Ratio (and its reciprocal)             | A/B               | B/A                         |
| 95% CI of ratio                        | 0,2906            | 3,441                       |
|                                        | 0,09448 to 0,8938 | 1,119 to 10,58              |
| Hazard Ratio (logrank)                 |                   |                             |
| Ratio (and its reciprocal)             | A/B               | B/A                         |
| 95% CI of ratio                        | 0,2768            | 3,612                       |
|                                        | 0,09789 to 0,8627 | 1,159 to 10,22 <sub>2</sub> |

# The rate of cases turning to severe, PPA

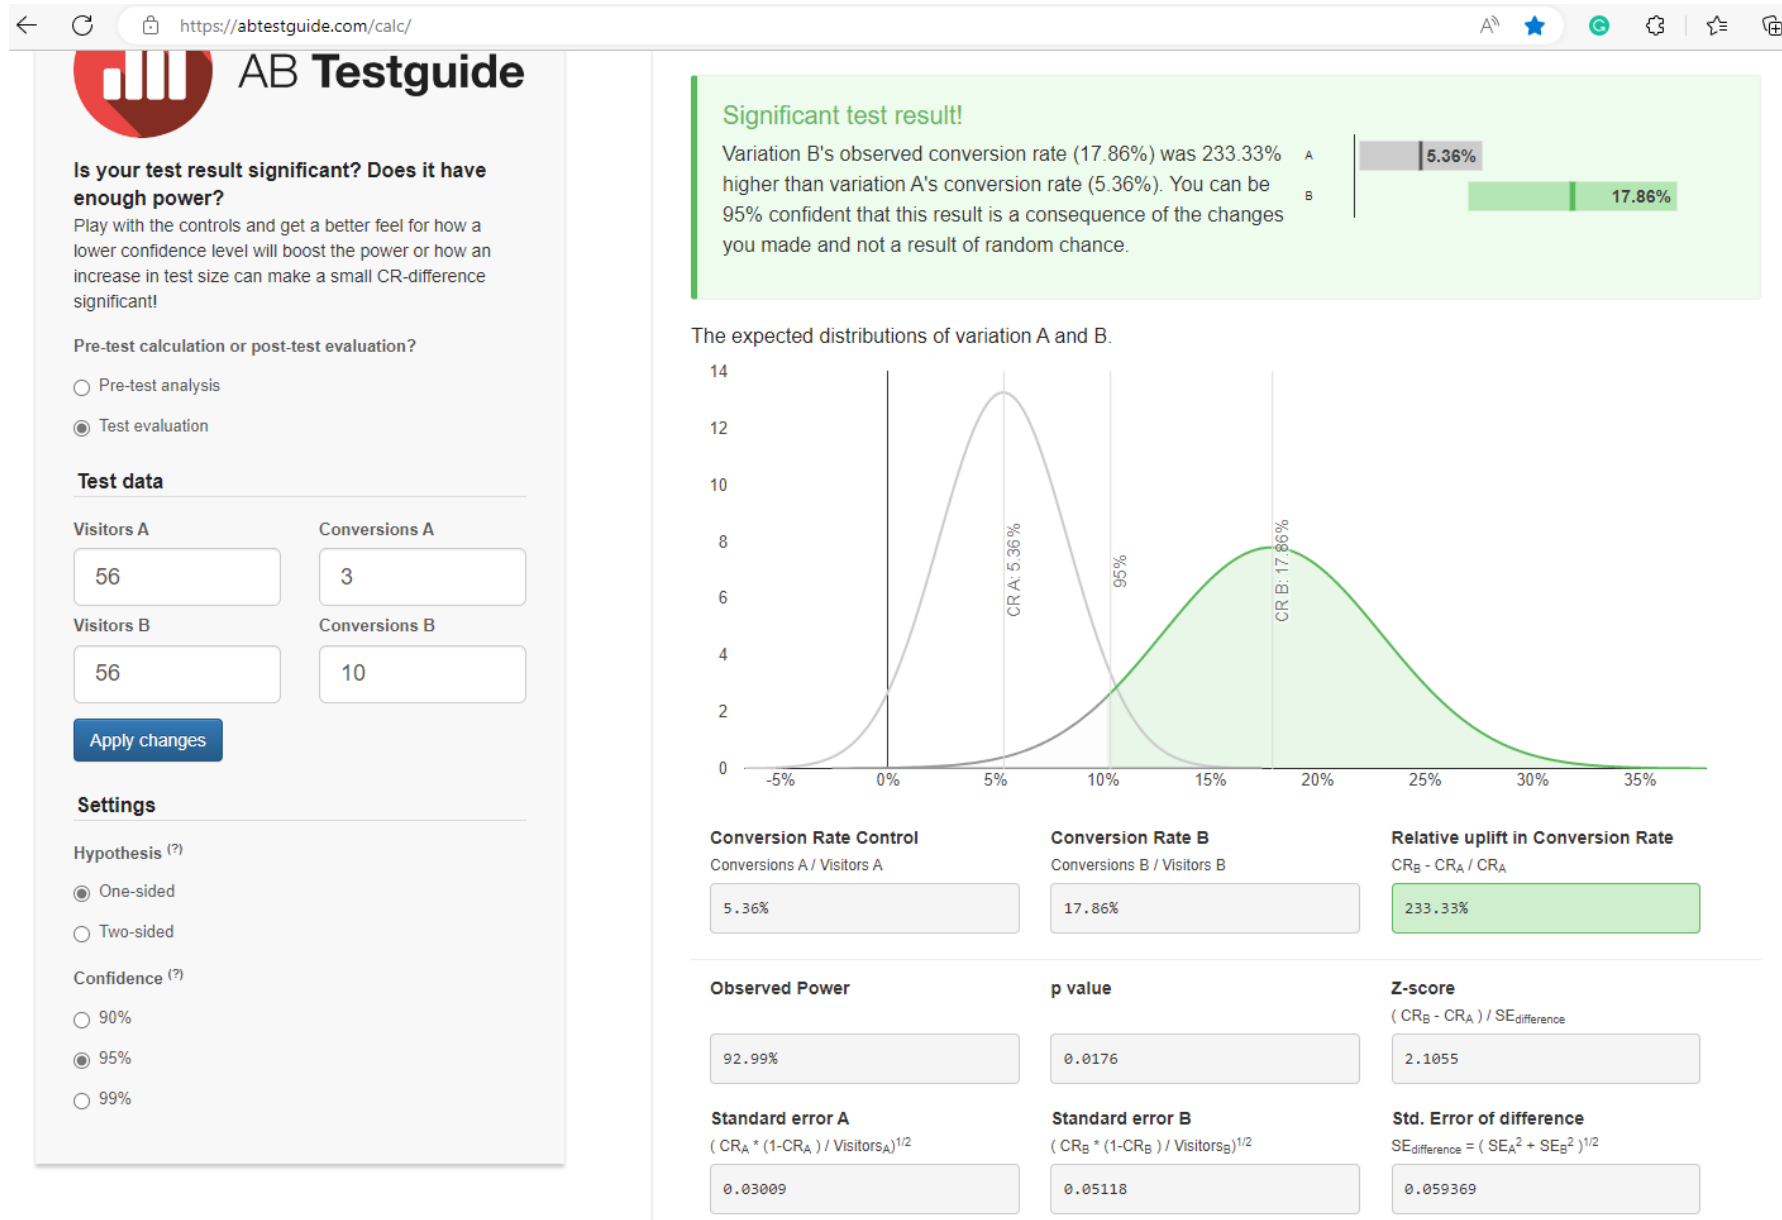

# The rate of cases turning to severe, ITT analysis

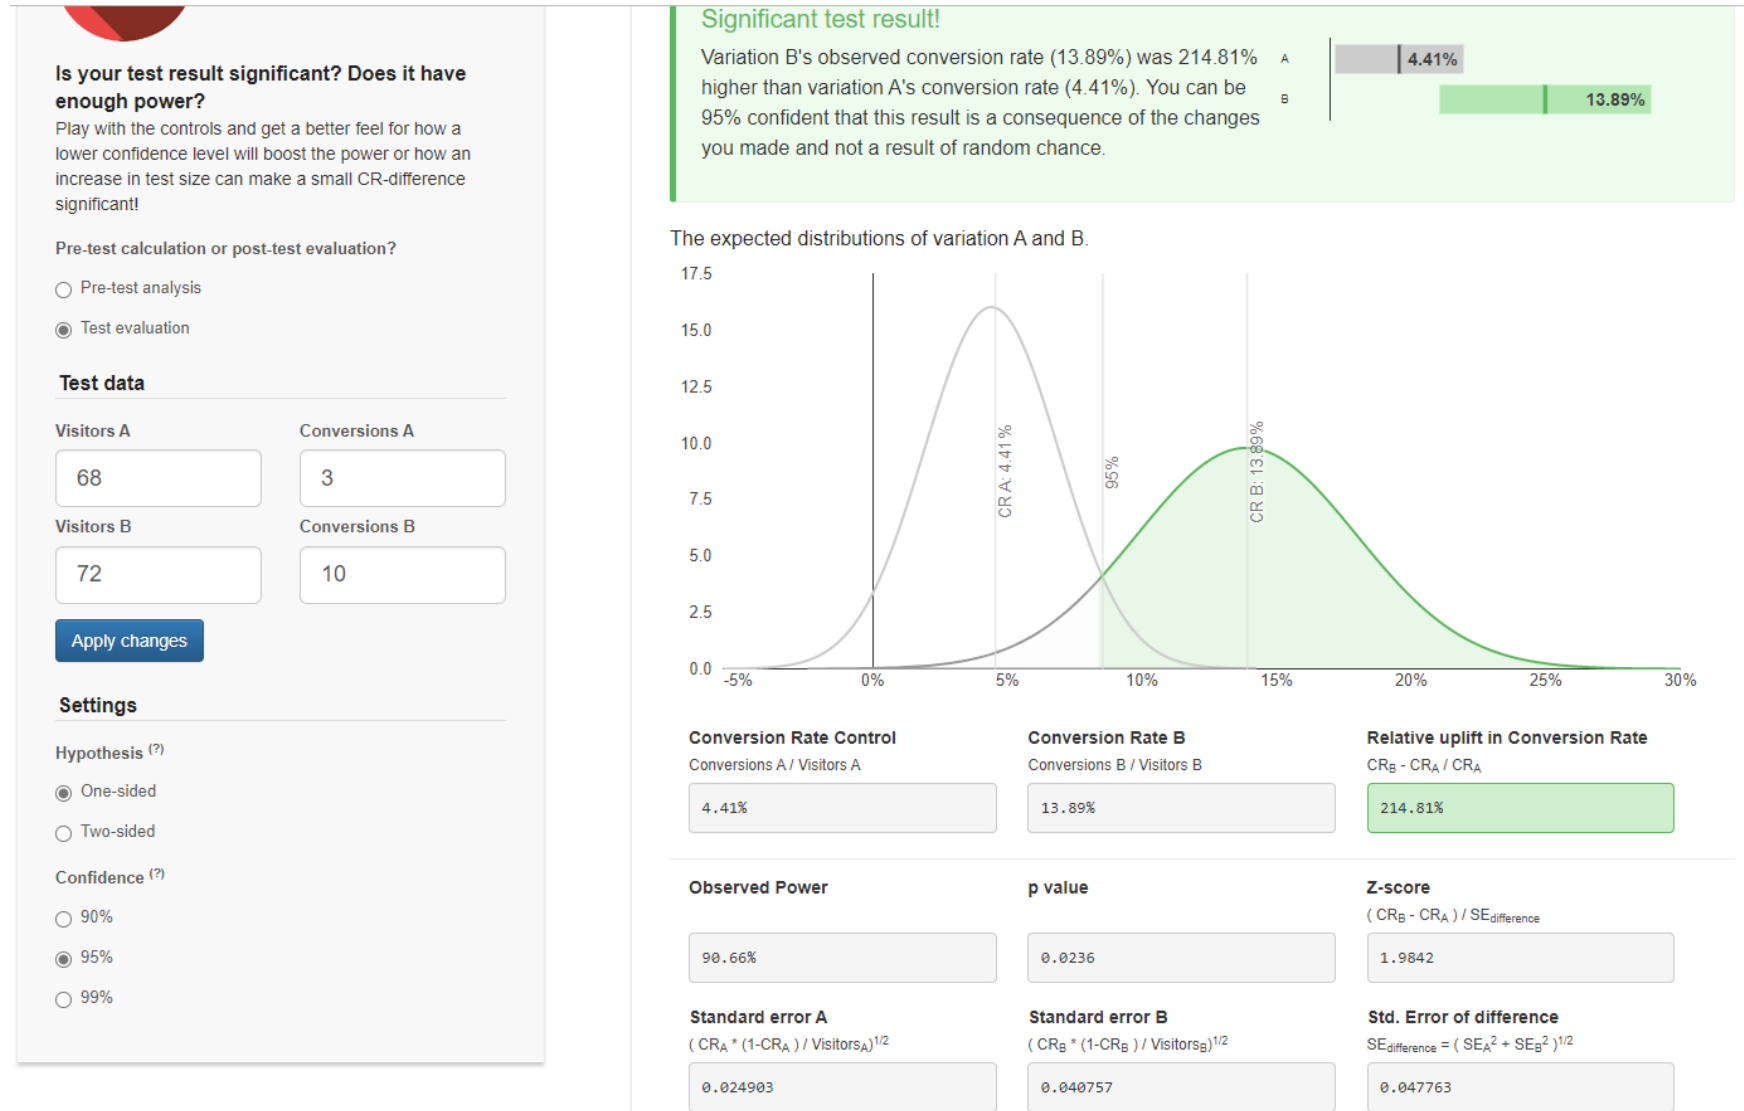

# The overall clinical effectiveness defined as the ratio of effective to ineffective cases vs placebo control

- Group A (Kan Jang, 56 patients) disease progression rate (5.36%).
- Group B's (placebo, 56 patients) disease progression rate (17.86%).
- Group A: Absolute effectiveness - 94,56%
  - Within group ratio of effective to ineffective cases 17.65
- Group B: Absolute effectiveness - 82,14%
- Relative effectiveness 4.6
  - Within group ratio of effective to ineffective cases 4.6
- Overall clinical effectiveness vs placebo control = 3.84
- [A/B-Test Calculator - Power & Significance - ABTestGuide.com](https://www.abtestguide.com/ab-test-calculator/)

# Days at clinic or home

ITT analysis in 140 patients

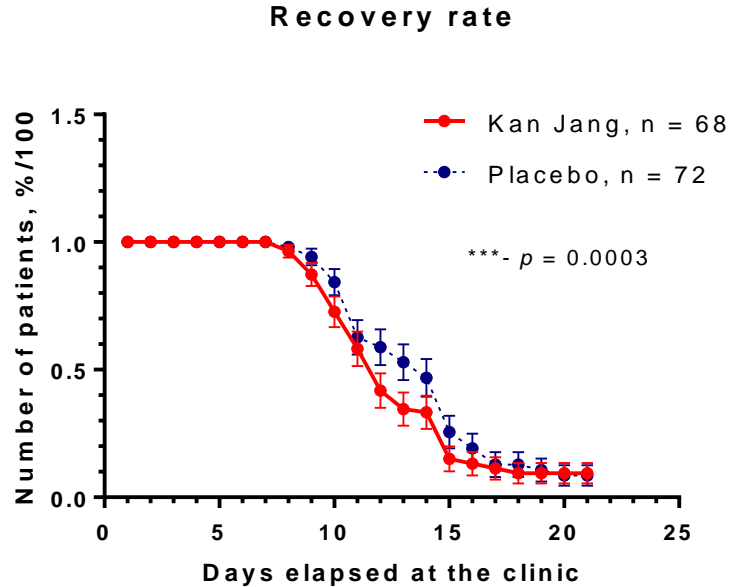

PP analysis in 100 patients

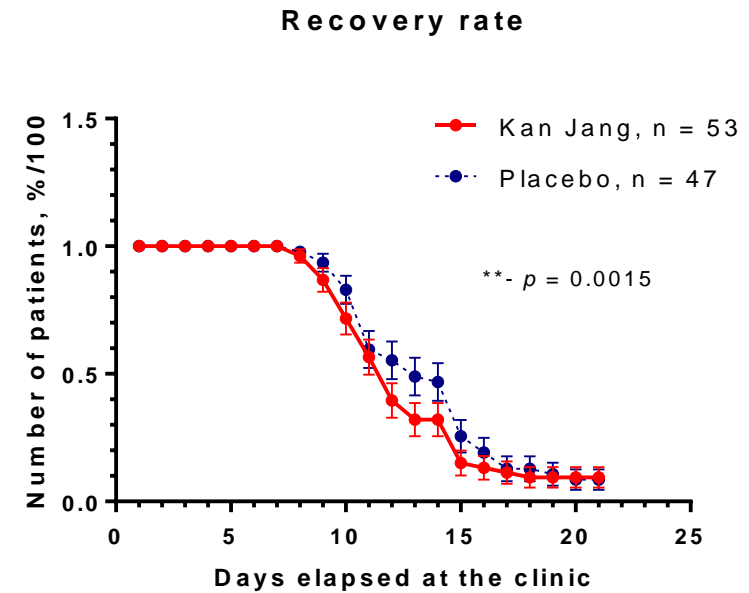

# Days at clinic or home

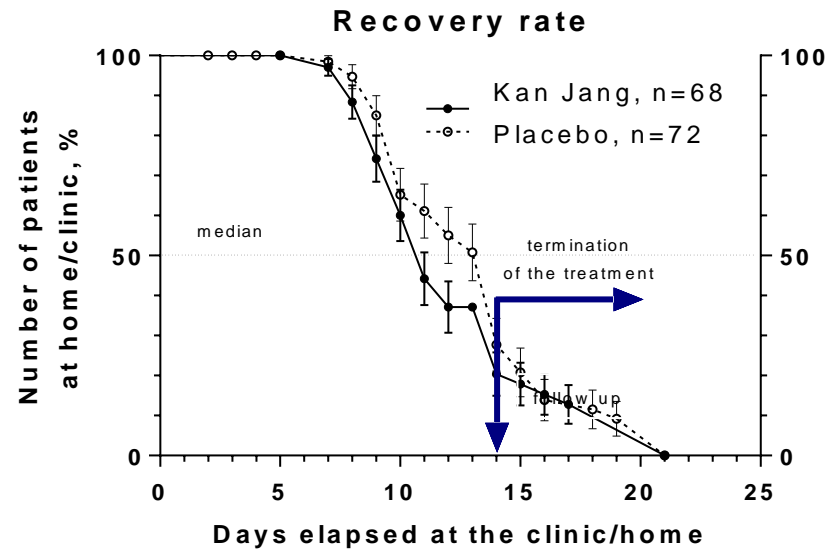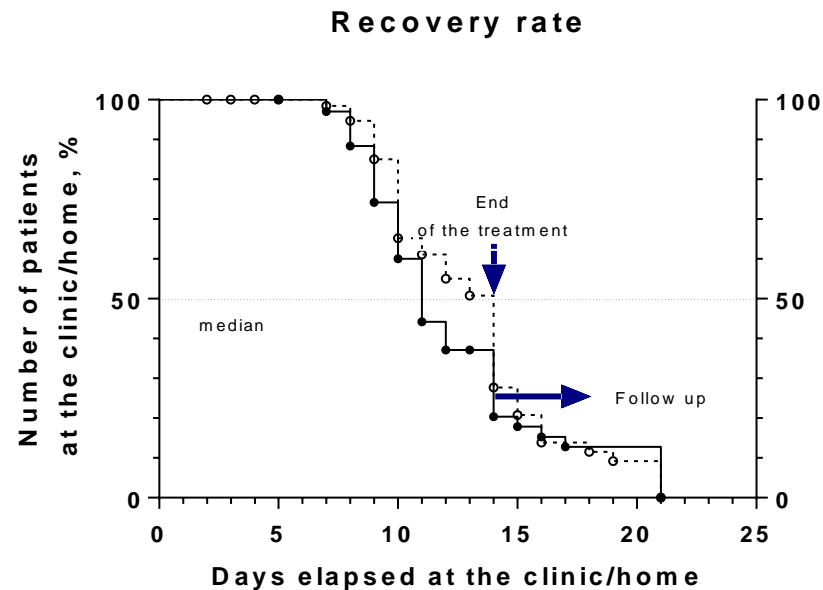

| Days elapsed                   | Kan Jang, n=68 |                 | Placebo, n=72   |     |
|--------------------------------|----------------|-----------------|-----------------|-----|
|                                | %              | SEM             | %               | SEM |
| 0                              | 100            |                 | 100             |     |
| 2                              |                |                 | 100             |     |
| 3                              |                |                 | 100             |     |
| 4                              |                |                 | 100             |     |
| 5                              | 100            |                 | 100             |     |
| 7                              | 97,0           | 2,1             | 98,5            | 1,5 |
| 8                              | 88,4           | 4,2             | 94,7            | 3,0 |
| 9                              | 74,2           | 5,8             | 85,0            | 4,9 |
| 10                             | 60,1           | 6,5             | 65,2            | 6,6 |
| 11                             | 44,2           | 6,6             | 61,2            | 6,8 |
| 12                             | 37,1           | 6,4             | 55,0            | 7,0 |
| 13                             | 37,1           |                 | 50,8            | 7,1 |
| 14                             | 20,4           | 5,4             | 27,7            | 6,6 |
| 15                             | 17,9           | 5,3             | 20,8            | 6,1 |
| 16                             | 15,3           | 5,1             | 13,9            | 5,2 |
| 17                             | 12,8           | 4,9             |                 |     |
| 18                             |                |                 | 11,5            | 4,8 |
| 19                             |                |                 | 9,2             | 4,4 |
| 21                             | 0              | 0               | 0               | 0   |
| Median at clinic /home         |                |                 |                 |     |
| Kan Jang, n=68                 |                | 11              |                 |     |
| Placebo, n=72                  |                | 14              |                 |     |
| Ratio (and its reciprocal)     |                | 0,7857          | 1,273           |     |
| 95% CI of ratio                |                | 0,5305 to 1,164 | 0,8594 to 1,885 |     |
|                                |                |                 |                 |     |
| Hazard Ratio (Mantel-Haenszel) |                | A/B             | B/A             |     |
| Ratio (and its reciprocal)     |                | 1,232           | 0,8117          |     |
| 95% CI of ratio                |                | 0,7780 to 1,951 | 0,5126 to 1,285 |     |

# Negative conversion rate of SARS CoV-2 virus detection

## ITT analysis in 140 patients

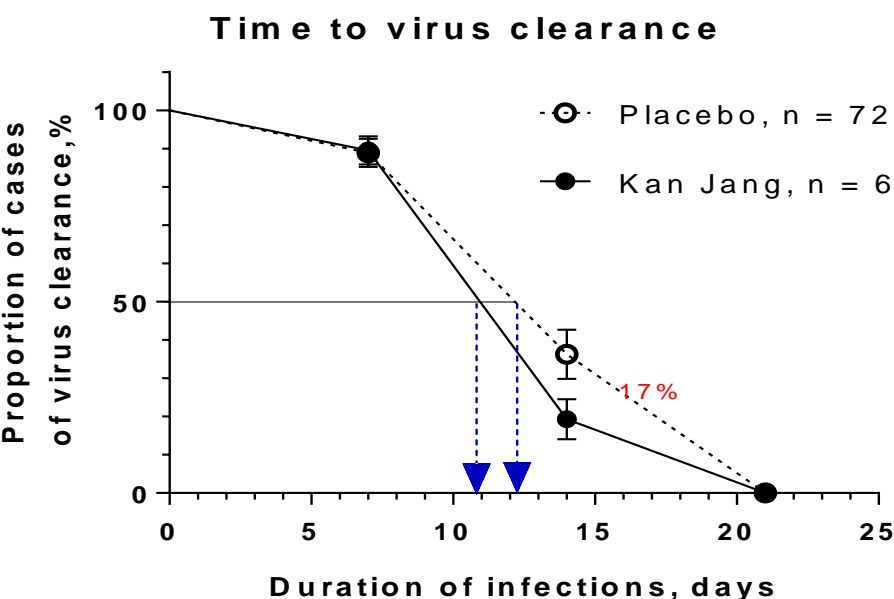

Hazard Ratio, Kan Jang/Placebo - 1,69  
95% CI of ratio: from 0,8698 to

| Days elapsed | Kan Jang, n=68 |     | Placebo, n=72 |     |
|--------------|----------------|-----|---------------|-----|
|              |                | SEM |               | SEM |
| 0            | 100            |     | 100           |     |
| 7            | 89,6           | 3,7 | 88,9          | 3,7 |
| 14           | 19,3           | 5,2 | 36,3          | 6,4 |
| 21           | 0              | 0   | 0             | 0   |

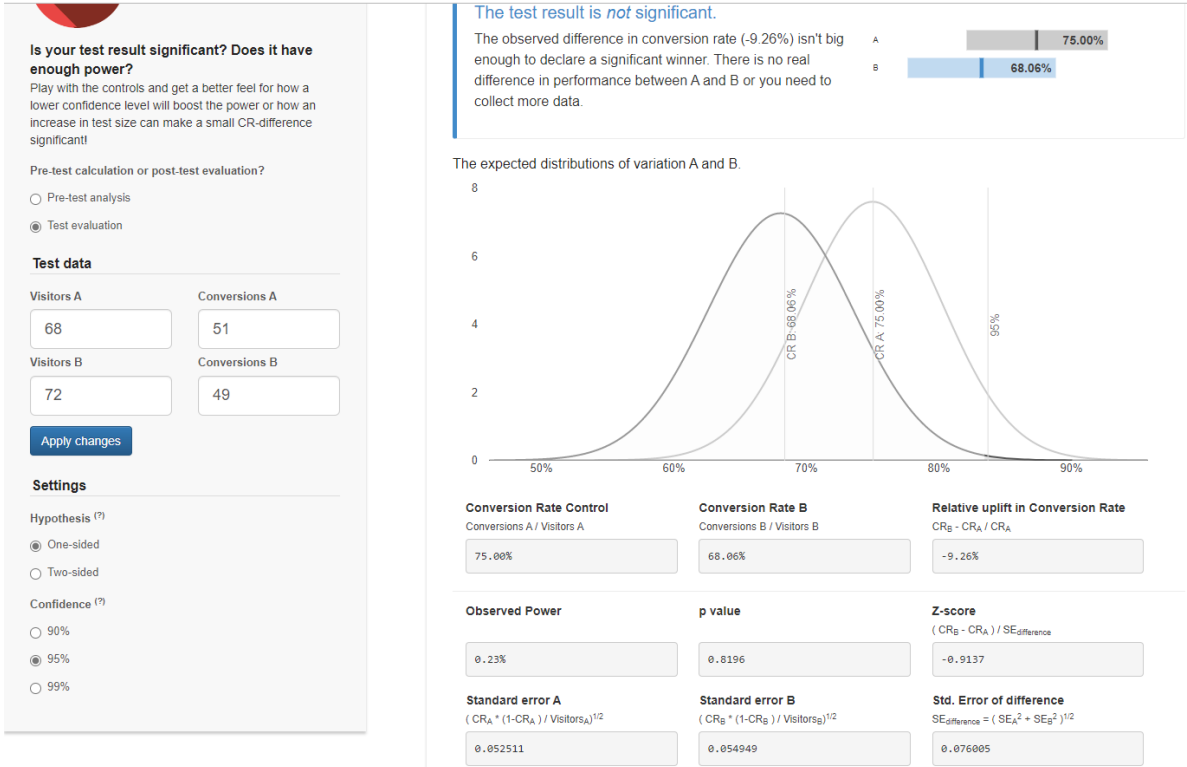

# Disappearance rate of symptoms Cough

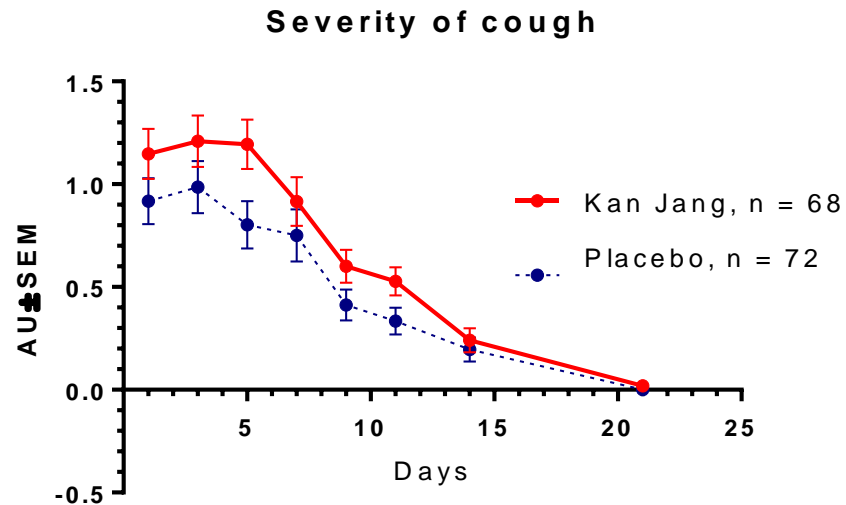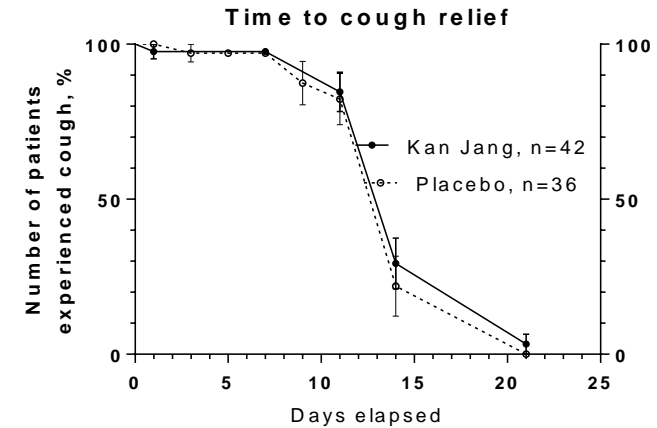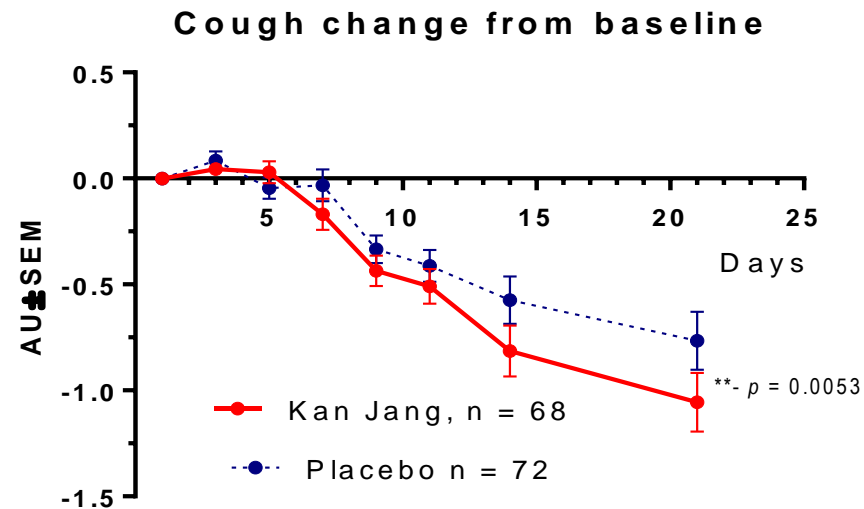

ITT analysis in 140 patients

| Days | Kan Jang, n = 68 |       |    | Placebo, n=72 |       |    |
|------|------------------|-------|----|---------------|-------|----|
|      | Mean             | SD    | n  | Mean          | SD    | n  |
| 1    | 0                | 0     | 68 | 0             | 0     | 72 |
| 3    | 0,045            | 0,025 | 67 | 0,085         | 0,044 | 71 |
| 5    | 0,030            | 0,052 | 67 | -0,045        | 0,050 | 66 |
| 7    | -0,169           | 0,073 | 59 | -0,033        | 0,075 | 60 |
| 9    | -0,436           | 0,072 | 55 | -0,333        | 0,067 | 51 |
| 11   | -0,509           | 0,082 | 55 | -0,412        | 0,075 | 51 |
| 14   | -0,815           | 0,121 | 54 | -0,574        | 0,113 | 47 |
| 21   | -1,057           | 0,138 | 53 | -0,766        | 0,137 | 47 |

# Cough

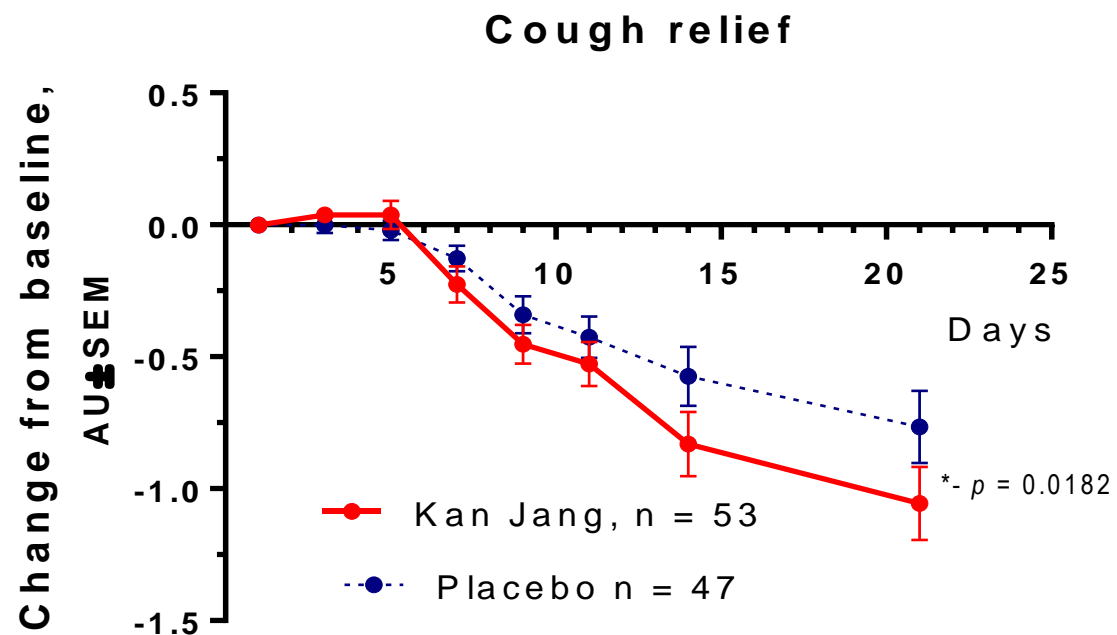

## PP analysis in 100 patients

| Days | Kan Jang, n = 53 |       |    | Placebo, n=47 |       |    |
|------|------------------|-------|----|---------------|-------|----|
|      | Mean             | SD    | n  | Mean          | SD    | n  |
| 1    | 0                | 0     | 53 | 0             | 0     | 47 |
| 3    | 0,038            | 0,026 | 53 | 0,000         | 0,030 | 47 |
| 5    | 0,038            | 0,054 | 53 | -0,021        | 0,037 | 47 |
| 7    | -0,226           | 0,069 | 53 | -0,128        | 0,049 | 47 |
| 9    | -0,453           | 0,074 | 53 | -0,340        | 0,070 | 47 |
| 11   | -0,528           | 0,083 | 53 | -0,426        | 0,079 | 47 |
| 14   | -0,830           | 0,123 | 53 | -0,574        | 0,113 | 47 |
| 21   | -1,057           | 0,138 | 53 | -0,766        | 0,137 | 47 |

# Cough

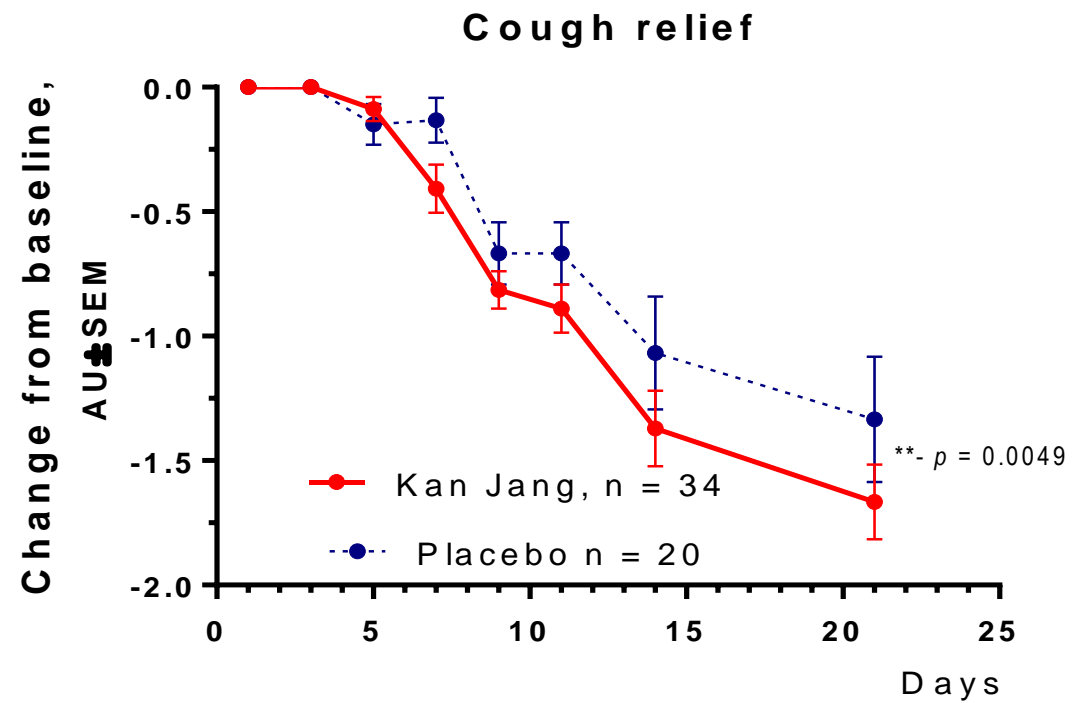

## ITT analysis in a subgroup of 54 patients

| Days | Kan Jang, n = 34 |       |    | Placebo, n=20 |       |    |
|------|------------------|-------|----|---------------|-------|----|
|      | Mean             | SD    | n  | Mean          | SD    | n  |
| 1    | 0                | 0     | 34 | 0             | 0     | 20 |
| 3    | 0                | 0     | 34 | 0             | 0     | 20 |
| 5    | -0,088           | 0,049 | 34 | -0,150        | 0,082 | 20 |
| 7    | -0,407           | 0,096 | 27 | -0,133        | 0,091 | 15 |
| 9    | -0,815           | 0,076 | 27 | -0,667        | 0,126 | 15 |
| 11   | -0,889           | 0,097 | 27 | -0,667        | 0,126 | 15 |
| 14   | -1,370           | 0,152 | 27 | -1,067        | 0,228 | 15 |
| 21   | -1,667           | 0,151 | 27 | -1,333        | 0,252 | 15 |

# Cough

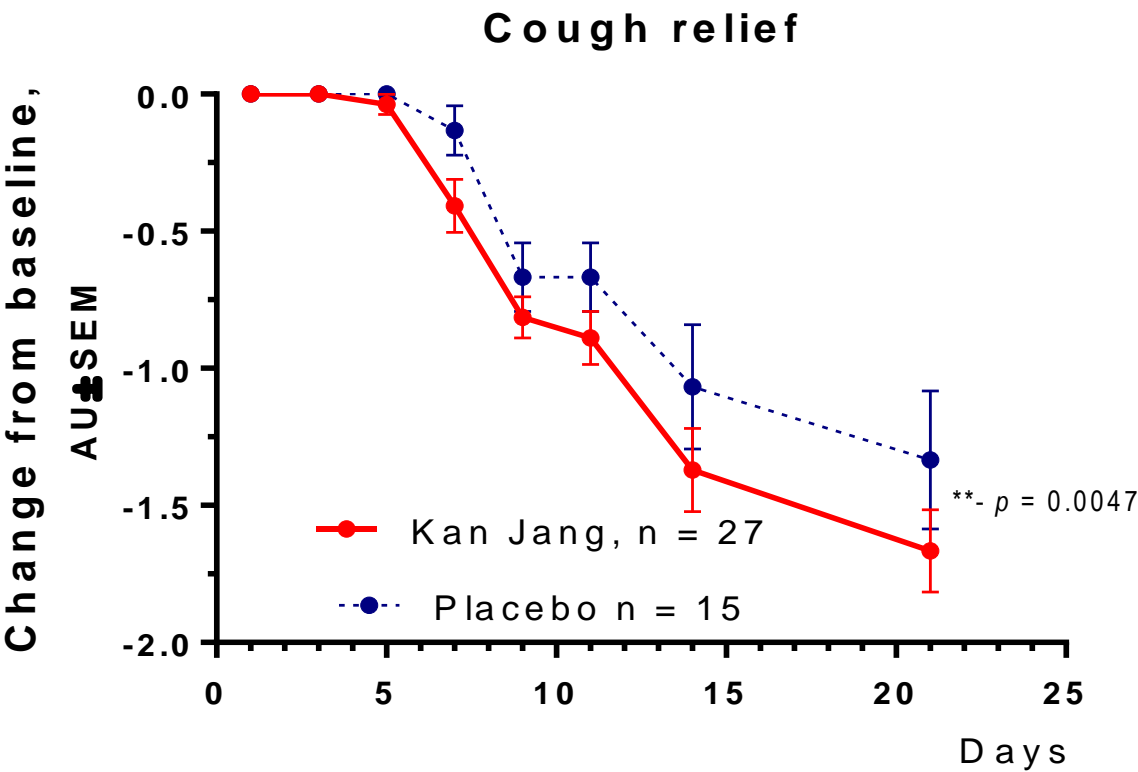

## PP analysis in a subgroup of 42 patients

| Days | Kan Jang, n = 27 |       |    | Placebo, n=15 |       |    |
|------|------------------|-------|----|---------------|-------|----|
|      | Mean             | SD    | n  | Mean          | SD    | n  |
| 1    | 0                | 0     | 27 | 0             | 0     | 15 |
| 3    | 0                | 0     | 27 | 0             | 0     | 15 |
| 5    | -0,037           | 0,037 | 27 | 0             | 0     | 15 |
| 7    | -0,407           | 0,096 | 27 | -0,133        | 0,091 | 15 |
| 9    | -0,815           | 0,076 | 27 | -0,667        | 0,126 | 15 |
| 11   | -0,889           | 0,097 | 27 | -0,667        | 0,126 | 15 |
| 14   | -1,370           | 0,152 | 27 | -1,067        | 0,228 | 15 |
| 21   | -1,667           | 0,151 | 27 | -1,333        | 0,252 | 15 |

# Sore throat pain

## ITT analysis in 140 patients

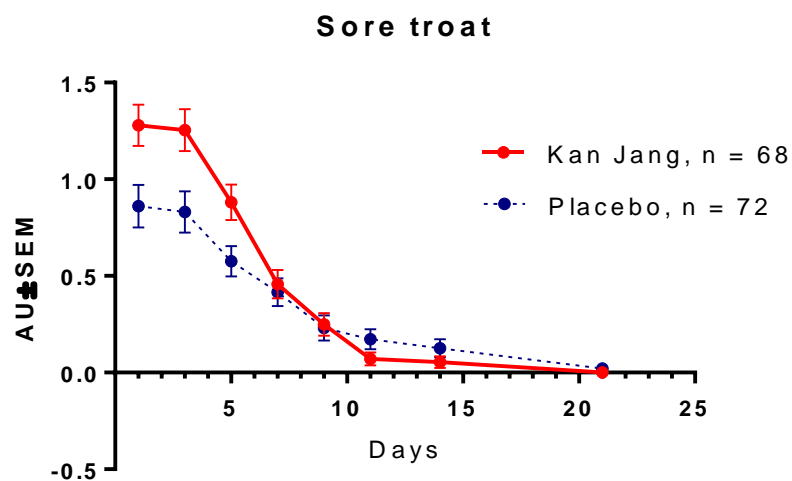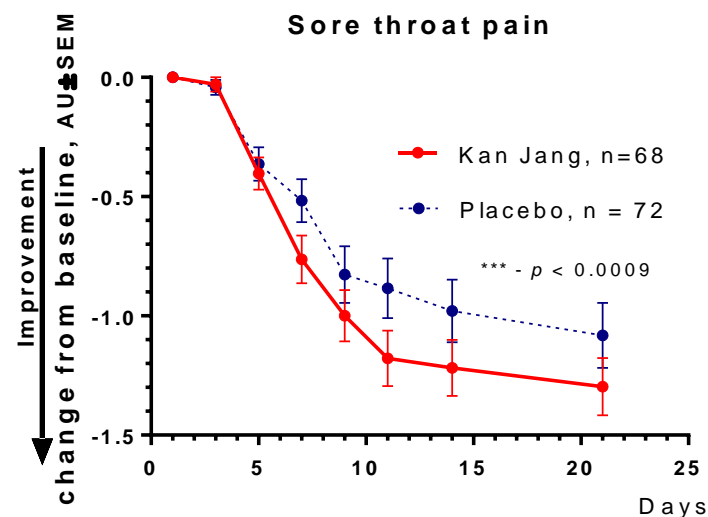

| Days | Kan Jang, n = 68 |       |    | Placebo, n=72 |      |    |
|------|------------------|-------|----|---------------|------|----|
|      | Mean             | SD    | n  | Mean          | SD   | n  |
| 1    | 0                | 0     | 68 | 0             | 0    | 72 |
| 3    | -0,030           | 0,030 | 67 | -0,04         | 0,03 | 71 |
| 5    | -0,403           | 0,067 | 67 | -0,36         | 0,07 | 66 |
| 7    | -0,763           | 0,101 | 59 | -0,52         | 0,09 | 60 |
| 9    | -1,000           | 0,108 | 56 | -0,83         | 0,12 | 52 |
| 11   | -1,179           | 0,117 | 56 | -0,88         | 0,12 | 52 |
| 14   | -1,218           | 0,118 | 55 | -0,98         | 0,13 | 49 |
| 21   | -1,296           | 0,120 | 54 | -1,08         | 0,14 | 49 |

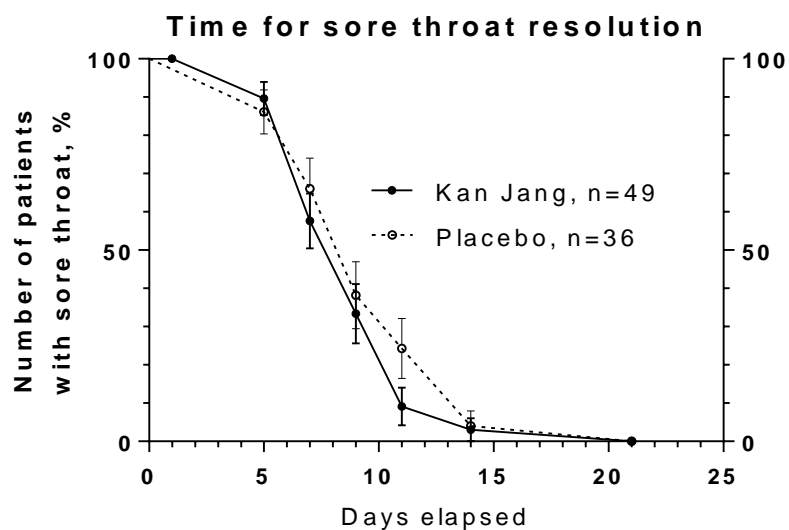

| Days elapsed | Kan Jang, n=68 |       | Placebo, n=72 |       |
|--------------|----------------|-------|---------------|-------|
| 0            | 100            |       | 100           |       |
| 1            | 100            |       |               |       |
| 5            | 89,583         | 4,409 | 86,111        | 5,764 |
| 7            | 57,589         | 7,204 | 66,019        | 7,984 |
| 9            | 33,341         | 7,743 | 38,221        | 8,791 |
| 11           | 9,093          | 4,950 | 24,323        | 7,876 |
| 14           | 3,031          | 2,974 | 4,054         | 3,926 |
| 21           | 0              | 0     | 0             | 0     |

# Sore throat pain

## PP analysis in 103 patients

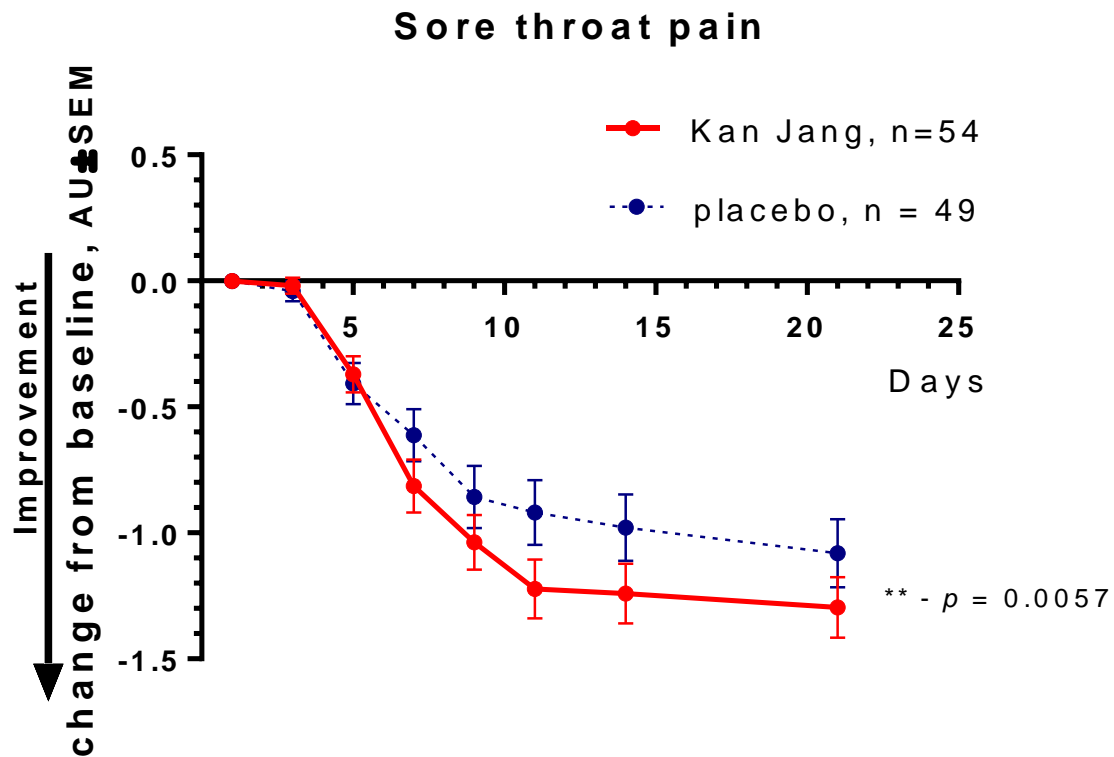

| Days | Kan Jang, n = 54 |       |    | Placebo, n=49 |      |    |
|------|------------------|-------|----|---------------|------|----|
|      | Mean             | SD    | n  | Mean          | SD   | n  |
| 1    | 0                | 0     | 54 | 0             | 0    | 49 |
| 3    | -0,019           | 0,032 | 54 | -0,04         | 0,04 | 49 |
| 5    | -0,370           | 0,071 | 54 | -0,41         | 0,08 | 49 |
| 7    | -0,815           | 0,106 | 54 | -0,61         | 0,10 | 49 |
| 9    | -1,037           | 0,109 | 54 | -0,86         | 0,12 | 49 |
| 11   | -1,222           | 0,117 | 54 | -0,92         | 0,13 | 49 |
| 14   | -1,241           | 0,118 | 54 | -0,98         | 0,13 | 49 |
| 21   | -1,296           | 0,120 | 54 | -1,08         | 0,14 | 49 |

# Sore throat pain

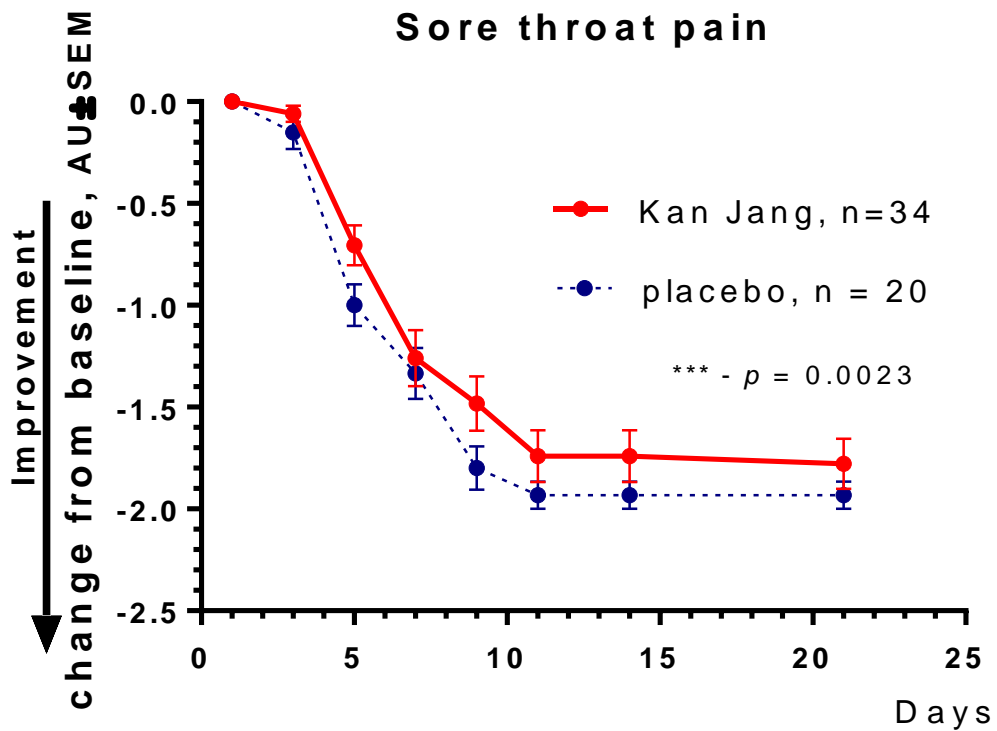

## ITT analysis in a subgroup of 54 patients

| Days | Kan Jang, n = 34 |       |    | Placebo, n=20 |       |    |
|------|------------------|-------|----|---------------|-------|----|
|      | Mean             | SD    | n  | Mean          | SD    | n  |
| 1    | 0                | 0     | 34 | 0             | 0     | 20 |
| 3    | -0,059           | 0,041 | 34 | -0,150        | 0,082 | 20 |
| 5    | -0,706           | 0,099 | 34 | -1,000        | 0,103 | 20 |
| 7    | -1,259           | 0,137 | 27 | -1,333        | 0,126 | 15 |
| 9    | -1,481           | 0,135 | 27 | -1,800        | 0,107 | 15 |
| 11   | -1,741           | 0,126 | 27 | -1,933        | 0,067 | 15 |
| 14   | -1,741           | 0,126 | 27 | -1,933        | 0,067 | 15 |
| 21   | -1,778           | 0,123 | 27 | -1,933        | 0,067 | 15 |

# Sore throat pain

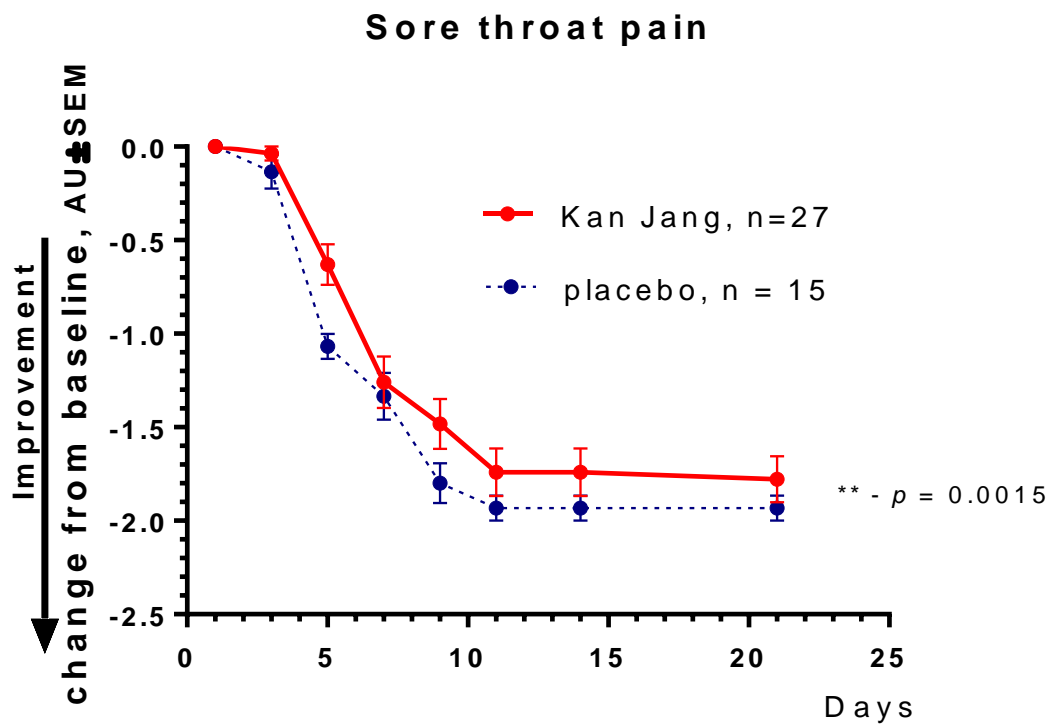

## PP analysis in a subgroup of 42 patients

| Days | Kan Jang, n = 27 |       |    | Placebo, n=15 |       |    |
|------|------------------|-------|----|---------------|-------|----|
|      | Mean             | SD    | n  | Mean          | SD    | n  |
| 1    | 0                | 0     | 27 | 0             | 0     | 15 |
| 3    | 0                | 0     | 27 | 0             | 0     | 15 |
| 5    | -0,037           | 0,037 | 27 | 0             | 0     | 15 |
| 7    | -0,407           | 0,096 | 27 | -0,133        | 0,091 | 15 |
| 9    | -0,815           | 0,076 | 27 | -0,667        | 0,126 | 15 |
| 11   | -0,889           | 0,097 | 27 | -0,667        | 0,126 | 15 |
| 14   | -1,370           | 0,152 | 27 | -1,067        | 0,228 | 15 |
| 21   | -1,667           | 0,151 | 27 | -1,333        | 0,252 | 15 |

# Runny nose

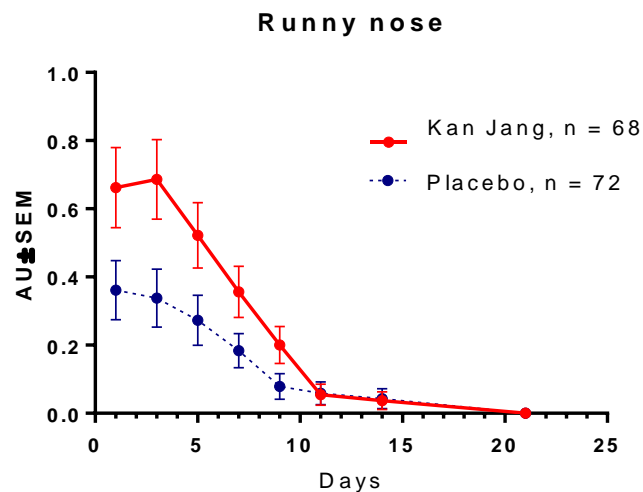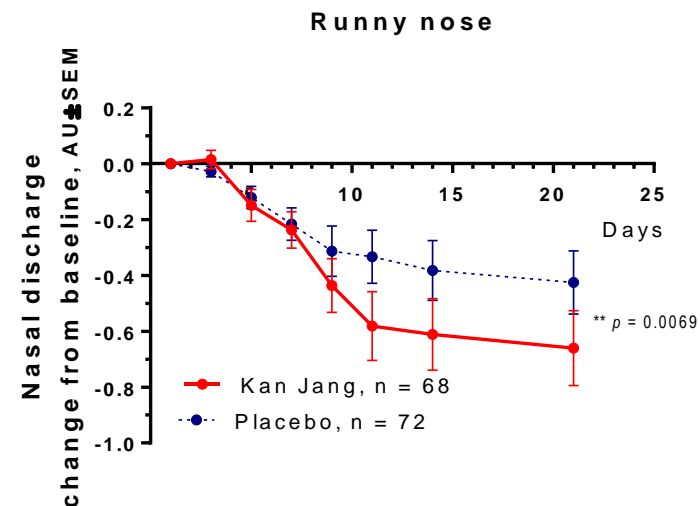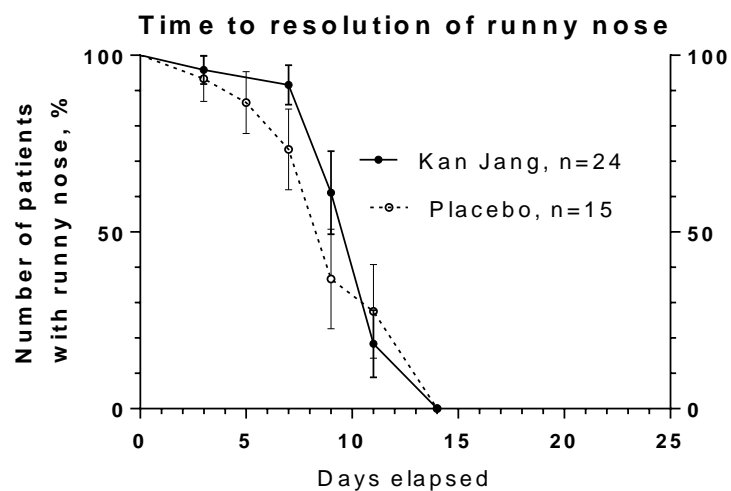

## ITT analysis in 140 patients

| Days | Kan Jang, n = 68 |       |    | Placebo, n=72 |       |    |
|------|------------------|-------|----|---------------|-------|----|
|      | Mean             | SD    | n  | Mean          | SD    | n  |
| 1    | 0                | 0     | 68 | 0             | 0     | 72 |
| 3    | 0,015            | 0,034 | 67 | -0,028        | 0,020 | 71 |
| 5    | -0,149           | 0,057 | 67 | -0,121        | 0,040 | 66 |
| 7    | -0,237           | 0,065 | 59 | -0,217        | 0,059 | 60 |
| 9    | -0,436           | 0,096 | 55 | -0,314        | 0,091 | 51 |
| 11   | -0,582           | 0,124 | 55 | -0,333        | 0,096 | 51 |
| 14   | -0,611           | 0,128 | 54 | -0,383        | 0,108 | 47 |
| 21   | -0,660           | 0,135 | 53 | -0,426        | 0,113 | 47 |

# Runny nose PP analysis in 100 patients

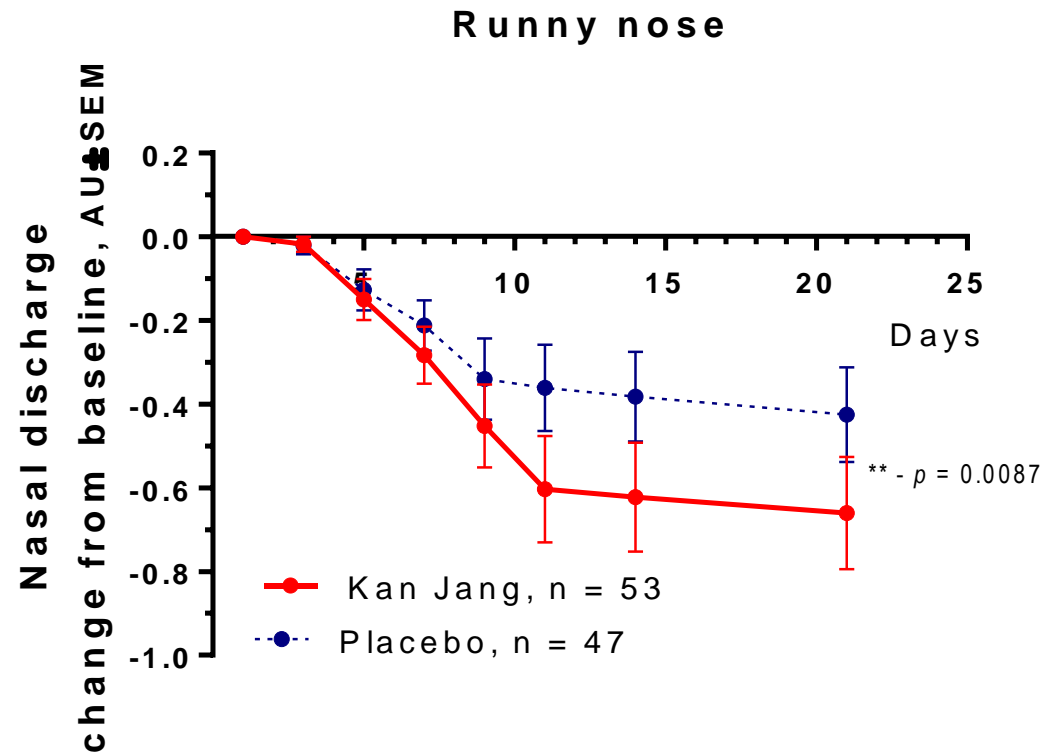

## PP analysis in 100 patients

| Days | Kan Jang, n = 53 |       |    | Placebo, n=47 |       |    |
|------|------------------|-------|----|---------------|-------|----|
|      | Mean             | SD    | n  | Mean          | SD    | n  |
| 1    | 0                | 0     | 53 | 0             | 0     | 47 |
| 3    | -0,019           | 0,019 | 53 | -0,021        | 0,021 | 47 |
| 5    | -0,151           | 0,050 | 53 | -0,128        | 0,049 | 47 |
| 7    | -0,283           | 0,068 | 53 | -0,213        | 0,060 | 47 |
| 9    | -0,453           | 0,099 | 53 | -0,340        | 0,098 | 47 |
| 11   | -0,604           | 0,127 | 53 | -0,362        | 0,103 | 47 |
| 14   | -0,623           | 0,130 | 53 | -0,383        | 0,108 | 47 |
| 21   | -0,660           | 0,135 | 53 | -0,426        | 0,113 | 47 |

# Runny nose

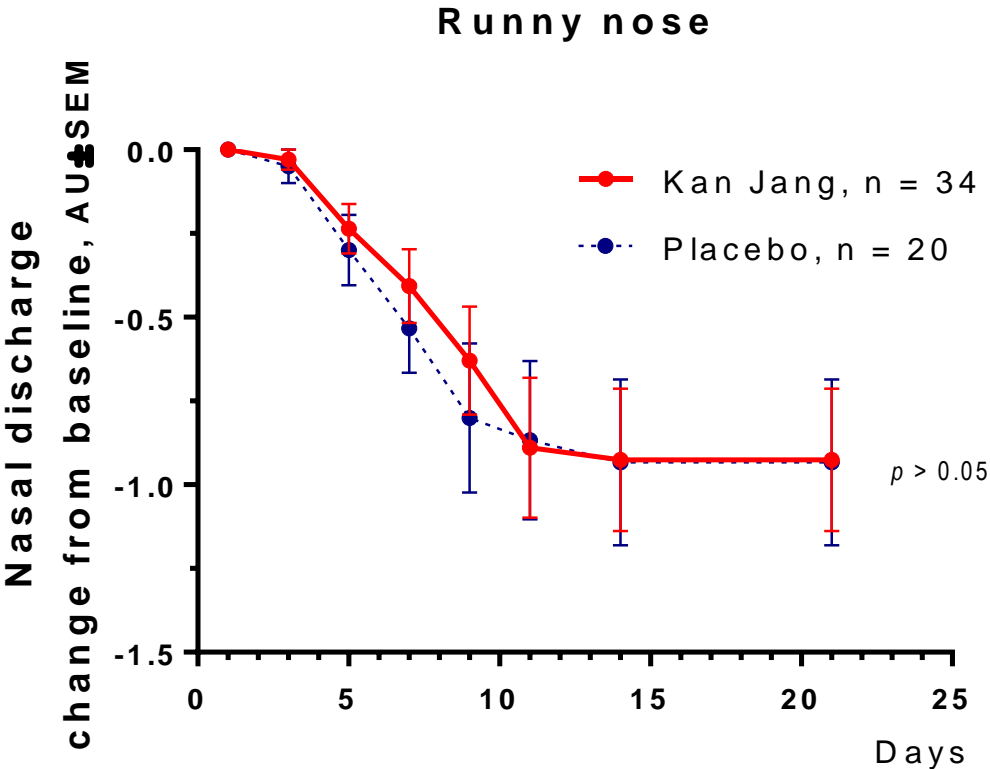

## ITT analysis in a subgroup of 54 patients

| Days | Kan Jang, n = 34 |       |        | Placebo, n=20 |       |    |
|------|------------------|-------|--------|---------------|-------|----|
|      | Mean             | SD    | n      | Mean          | SD    | n  |
| 1    | 0                | 0     | 34     | 0             | 0     | 20 |
| 3    | -0,029           | 0,029 | 34,000 | -0,050        | 0,050 | 20 |
| 5    | -0,235           | 0,074 | 34,000 | -0,300        | 0,105 | 20 |
| 7    | -0,407           | 0,110 | 27,000 | -0,533        | 0,133 | 15 |
| 9    | -0,630           | 0,161 | 27,000 | -0,800        | 0,223 | 15 |
| 11   | -0,889           | 0,209 | 27,000 | -0,867        | 0,236 | 15 |
| 14   | -0,926           | 0,213 | 27,000 | -0,933        | 0,248 | 15 |
| 21   | -0,926           | 0,213 | 27,000 | -0,933        | 0,248 | 15 |

# Runny nose

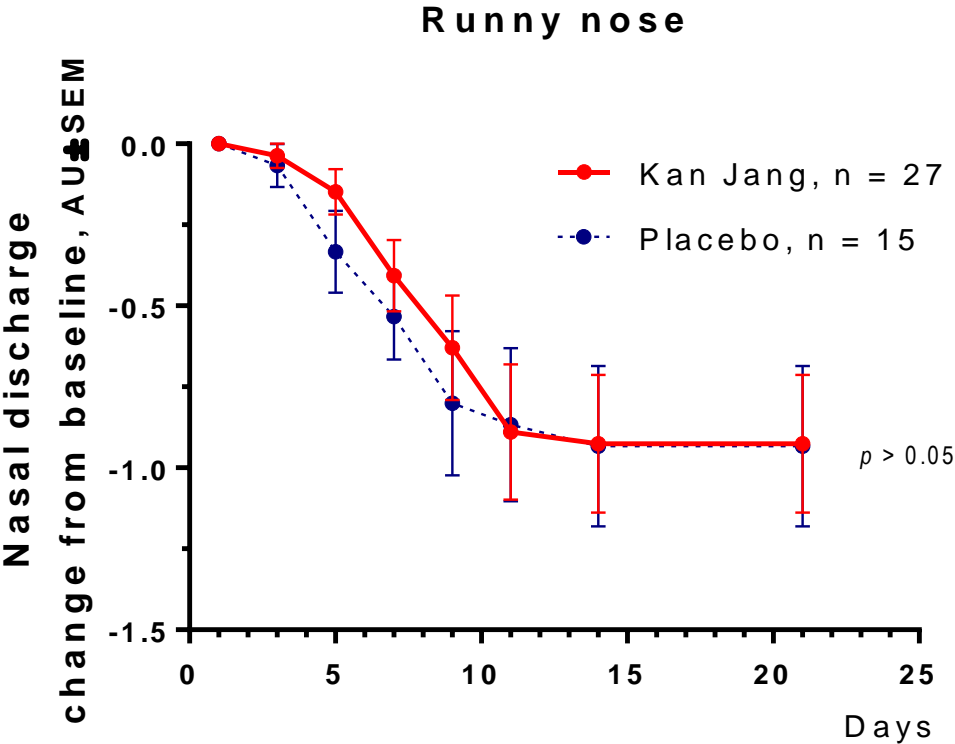

## PP analysis in a subgroup of 42 patients

| Days | Kan Jang, n = 27 |       |    | Placebo, n=15 |       |    |
|------|------------------|-------|----|---------------|-------|----|
|      | Mean             | SD    | n  | Mean          | SD    | n  |
| 1    | 0                | 0     | 27 | 0             | 0     | 15 |
| 3    | -0,037           | 0,037 | 27 | -0,067        | 0,067 | 15 |
| 5    | -0,148           | 0,070 | 27 | -0,333        | 0,126 | 15 |
| 7    | -0,407           | 0,110 | 27 | -0,533        | 0,133 | 15 |
| 9    | -0,630           | 0,161 | 27 | -0,800        | 0,223 | 15 |
| 11   | -0,889           | 0,209 | 27 | -0,867        | 0,236 | 15 |
| 14   | -0,926           | 0,213 | 27 | -0,933        | 0,248 | 15 |
| 21   | -0,926           | 0,213 | 27 | -0,933        | 0,248 | 15 |

# Muscle soreness

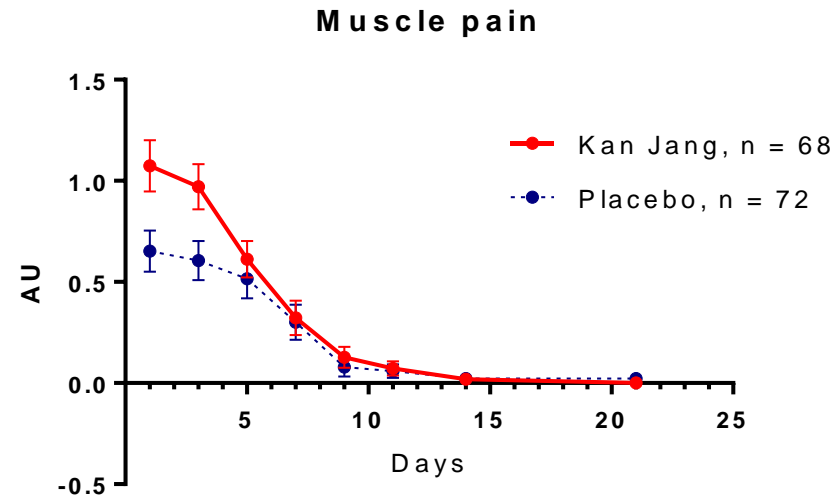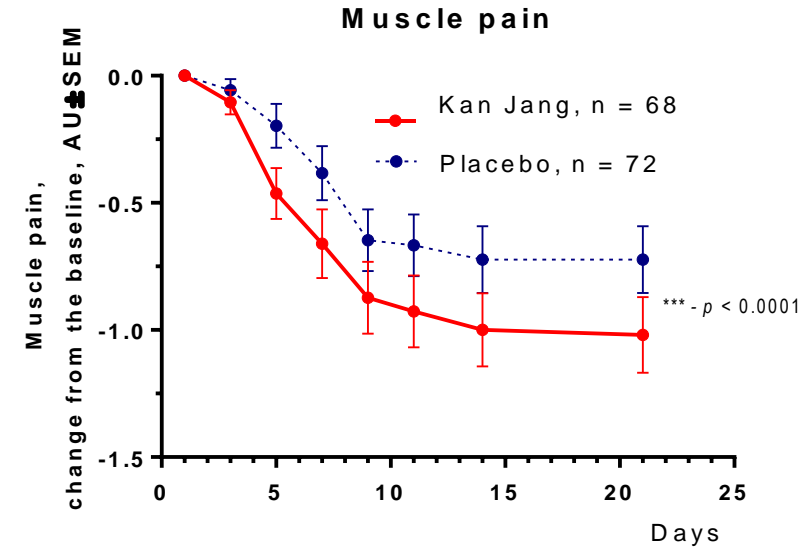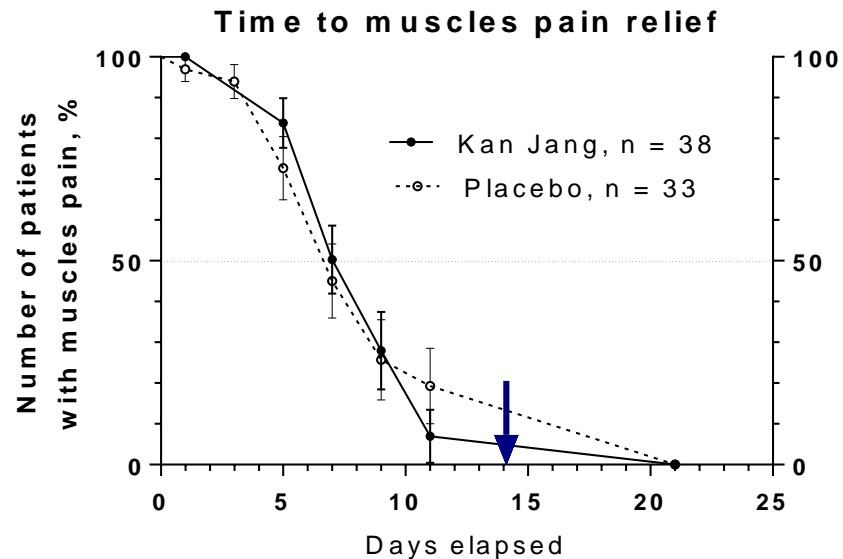

ITT analysis in 140 patients

| Days | Kan Jang, n = 68 |       |    | Placebo, n=72 |       |    |
|------|------------------|-------|----|---------------|-------|----|
|      | Mean             | SD    | n  | Mean          | SD    | n  |
| 1    | 0,000            | 0,000 | 68 | 0             | 0     | 72 |
| 3    | -0,104           | 0,048 | 67 | -0,056        | 0,044 | 71 |
| 5    | -0,463           | 0,100 | 67 | -0,197        | 0,087 | 66 |
| 7    | -0,661           | 0,136 | 59 | -0,383        | 0,107 | 60 |
| 9    | -0,873           | 0,142 | 55 | -0,647        | 0,122 | 51 |
| 11   | -0,927           | 0,142 | 55 | -0,667        | 0,121 | 51 |
| 14   | -1,000           | 0,145 | 54 | -0,723        | 0,132 | 47 |
| 21   | -1,019           | 0,149 | 53 | -0,723        | 0,132 | 47 |

# Muscle soreness

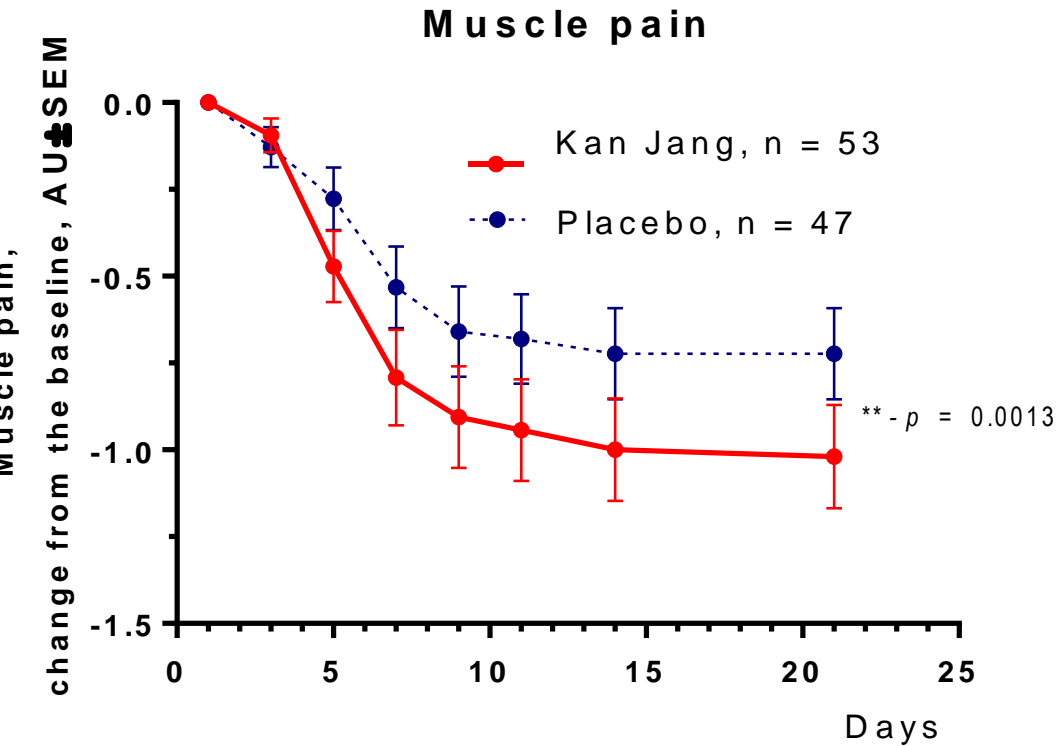

## PP analysis in 100 patients

| Days | Kan Jang, n = 53 |       |    | Placebo, n=47 |       |    |
|------|------------------|-------|----|---------------|-------|----|
|      | Mean             | SD    | n  | Mean          | SD    | n  |
| 1    | 0                | 0     | 53 | 0             | 0     | 47 |
| 3    | -0,094           | 0,049 | 53 | -0,128        | 0,058 | 47 |
| 5    | -0,472           | 0,103 | 53 | -0,277        | 0,090 | 47 |
| 7    | -0,792           | 0,138 | 53 | -0,532        | 0,117 | 47 |
| 9    | -0,906           | 0,146 | 53 | -0,660        | 0,130 | 47 |
| 11   | -0,943           | 0,146 | 53 | -0,681        | 0,129 | 47 |
| 14   | -1,000           | 0,148 | 53 | -0,723        | 0,132 | 47 |
| 21   | -1,019           | 0,149 | 53 | -0,723        | 0,132 | 47 |

# Muscle soreness

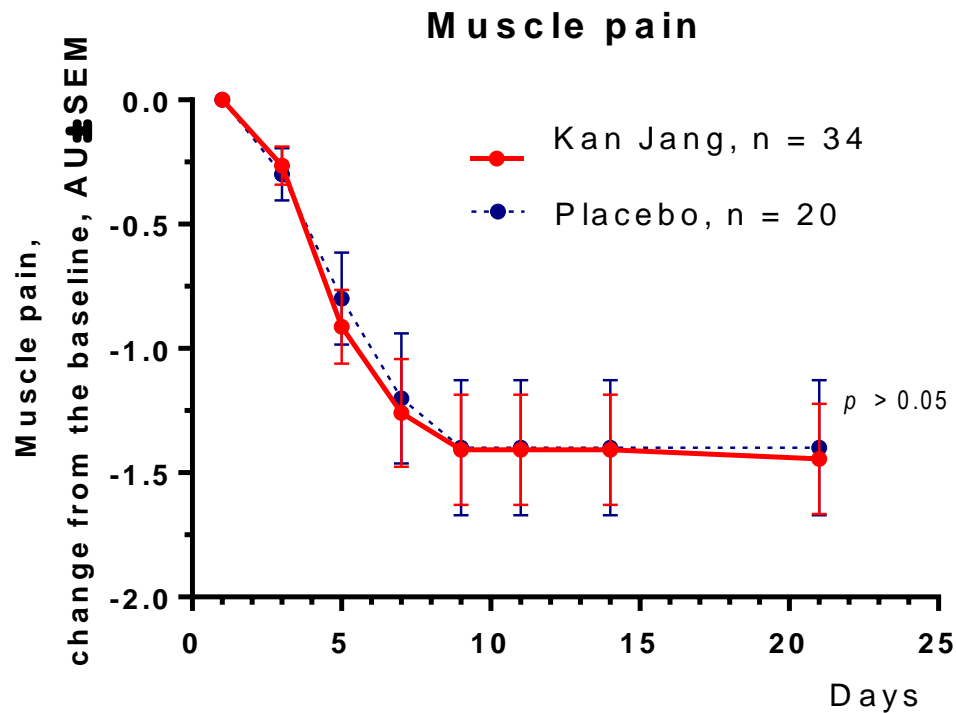

## ITT analysis in a subgroup of 54 patients

| Days | Kan Jang, n = 34 |       |        | Placebo, n=20 |       |    |
|------|------------------|-------|--------|---------------|-------|----|
|      | Mean             | SD    | n      | Mean          | SD    | n  |
| 1    | 0                | 0     | 34     | 0             | 0     | 20 |
| 3    | -0,029           | 0,029 | 34,000 | -0,050        | 0,050 | 20 |
| 5    | -0,235           | 0,074 | 34,000 | -0,300        | 0,105 | 20 |
| 7    | -0,407           | 0,110 | 27,000 | -0,533        | 0,133 | 15 |
| 9    | -0,630           | 0,161 | 27,000 | -0,800        | 0,223 | 15 |
| 11   | -0,889           | 0,209 | 27,000 | -0,867        | 0,236 | 15 |
| 14   | -0,926           | 0,213 | 27,000 | -0,933        | 0,248 | 15 |
| 21   | -0,926           | 0,213 | 27,000 | -0,933        | 0,248 | 15 |

# Muscle soreness

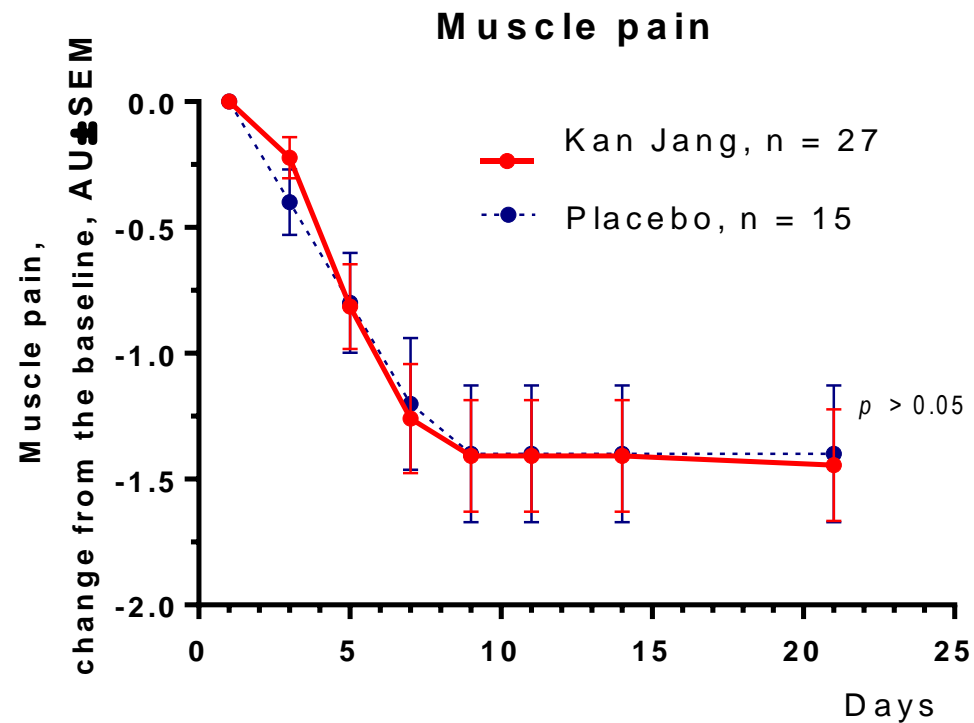

## PP analysis in a subgroup of 42 patients

| Days | Kan Jang, n = 27 |       |    | Placebo, n=15 |       |    |
|------|------------------|-------|----|---------------|-------|----|
|      | Mean             | SD    | n  | Mean          | SD    | n  |
| 1    | 0                | 0     | 27 | 0             | 0     | 15 |
| 3    | -0,222           | 0,082 | 27 | -0,400        | 0,131 | 15 |
| 5    | -0,815           | 0,169 | 27 | -0,800        | 0,200 | 15 |
| 7    | -1,259           | 0,217 | 27 | -1,200        | 0,262 | 15 |
| 9    | -1,407           | 0,222 | 27 | -1,400        | 0,273 | 15 |
| 11   | -1,407           | 0,222 | 27 | -1,400        | 0,273 | 15 |
| 14   | -1,407           | 0,222 | 27 | -1,400        | 0,273 | 15 |
| 21   | -1,444           | 0,222 | 27 | -1,400        | 0,273 | 15 |

# Fatigue

## ITT analysis in 140 patients

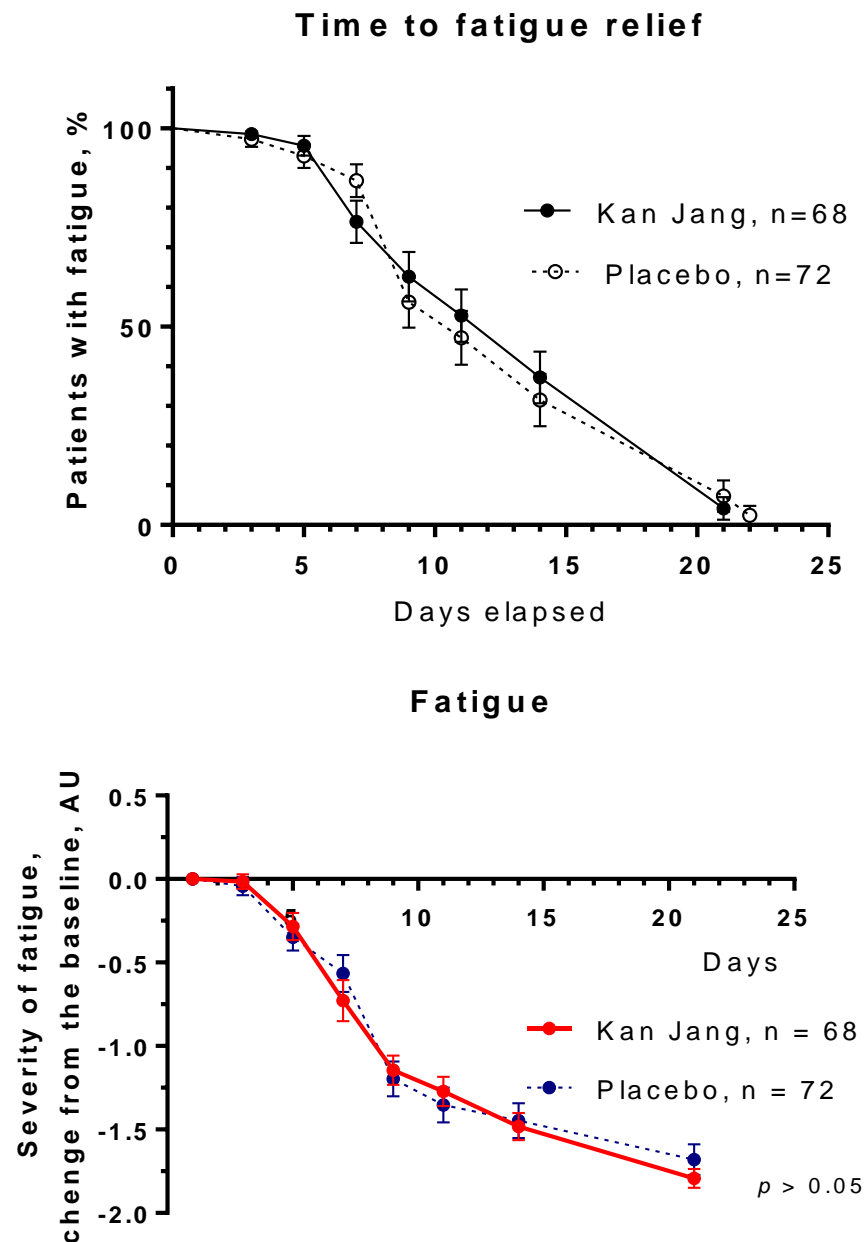

| Days | Kan Jang, n = 68 |       |    | Placebo, n=72 |       |    |
|------|------------------|-------|----|---------------|-------|----|
|      | Mean             | SD    | n  | Mean          | SD    | n  |
| 1    | 0                | 0     | 68 | 0             | 0     | 72 |
| 3    | -0,015           | 0,045 | 67 | -0,042        | 0,055 | 71 |
| 5    | -0,284           | 0,082 | 67 | -0,348        | 0,079 | 66 |
| 7    | -0,729           | 0,123 | 59 | -0,567        | 0,112 | 60 |
| 9    | -1,145           | 0,088 | 55 | -1,196        | 0,105 | 51 |
| 11   | -1,273           | 0,088 | 55 | -1,353        | 0,104 | 51 |
| 14   | -1,481           | 0,083 | 54 | -1,447        | 0,105 | 47 |
| 21   | -1,792           | 0,056 | 53 | -1,681        | 0,092 | 47 |

# Fatigue

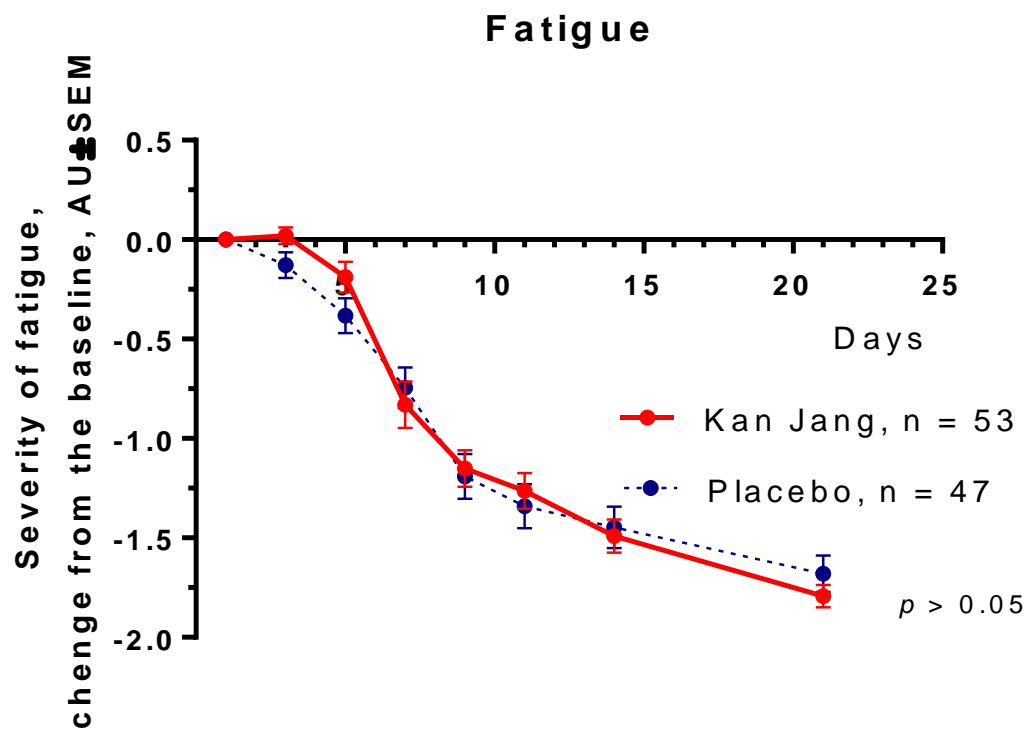

## PP analysis in 100 patients

| Days | Kan Jang, n = 53 |       |    | Placebo, n=47 |       |    |
|------|------------------|-------|----|---------------|-------|----|
|      | Mean             | SD    | n  | Mean          | SD    | n  |
| 1    | 0                | 0     | 53 | 0             | 0     | 47 |
| 3    | 0,019            | 0,043 | 53 | -0,128        | 0,065 | 47 |
| 5    | -0,189           | 0,076 | 53 | -0,383        | 0,089 | 47 |
| 7    | -0,830           | 0,117 | 53 | -0,745        | 0,103 | 47 |
| 9    | -1,151           | 0,091 | 53 | -1,191        | 0,112 | 47 |
| 11   | -1,264           | 0,090 | 53 | -1,340        | 0,111 | 47 |
| 14   | -1,491           | 0,084 | 53 | -1,447        | 0,105 | 47 |
| 21   | -1,792           | 0,056 | 53 | -1,681        | 0,092 | 47 |

# Fatigue

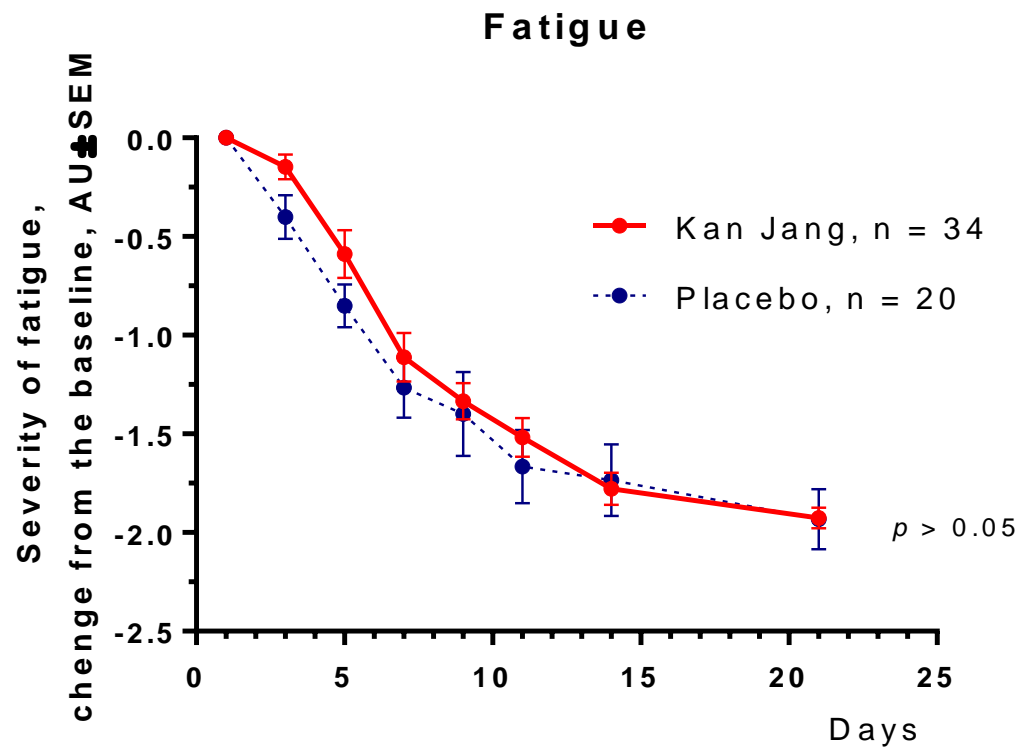

## ITT analysis in a subgroup of 54 patients

| Days | Kan Jang, n = 34 |       |    | Placebo, n=20 |          |    |
|------|------------------|-------|----|---------------|----------|----|
|      | Mean             | SD    | n  | Mean          | SD       | n  |
| 1    | 0                | 0     | 34 | 0             | 0        | 20 |
| 3    | -0,147           | 0,062 | 34 | -0,4          | 0,11239  | 20 |
| 5    | -0,588           | 0,120 | 34 | -0,85         | 0,109424 | 20 |
| 7    | -1,111           | 0,123 | 27 | -1,26667      | 0,153271 | 15 |
| 9    | -1,333           | 0,092 | 27 | -1,4          | 0,213809 | 15 |
| 11   | -1,519           | 0,098 | 27 | -1,66667      | 0,186871 | 15 |
| 14   | -1,778           | 0,082 | 27 | -1,73333      | 0,181703 | 15 |
| 21   | -1,926           | 0,051 | 27 | -1,93333      | 0,153271 | 15 |

# Fatigue

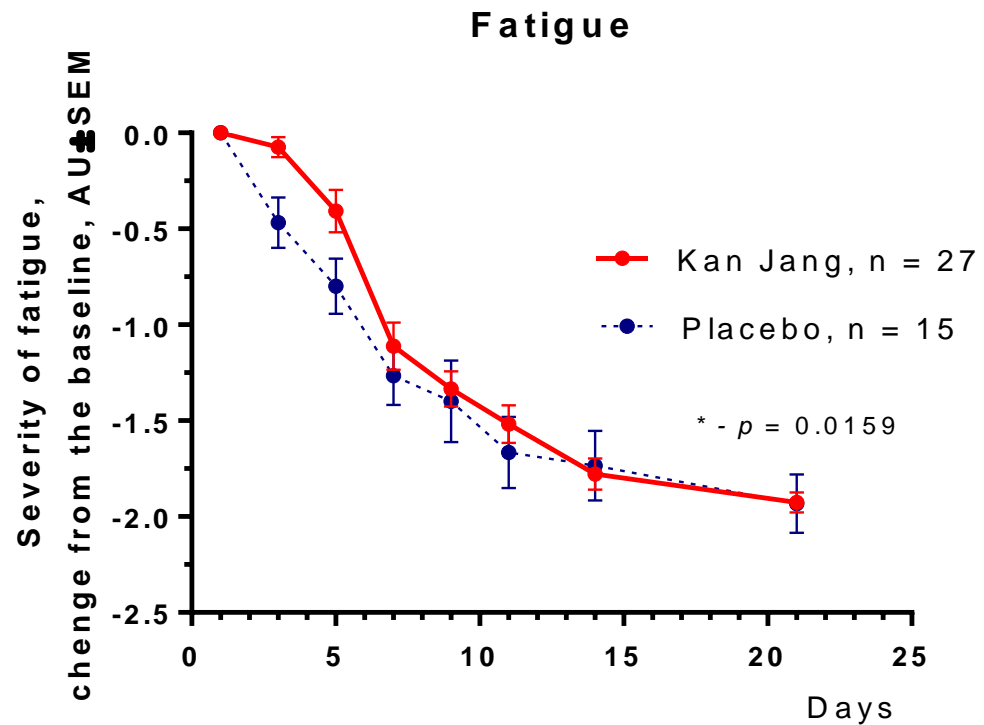

## PP analysis in a subgroup of 42 patients

| Days | Kan Jang, n = 27 |      |    | Placebo, n=15 |      |    |
|------|------------------|------|----|---------------|------|----|
|      | Mean             | SD   | n  | Mean          | SD   | n  |
| 1    | 0                | 0    | 27 | 0             | 0    | 15 |
| 3    | -0,07            | 0,05 | 27 | -0,47         | 0,13 | 15 |
| 5    | -0,41            | 0,11 | 27 | -0,80         | 0,14 | 15 |
| 7    | -1,11            | 0,12 | 27 | -1,27         | 0,15 | 15 |
| 9    | -1,33            | 0,09 | 27 | -1,40         | 0,21 | 15 |
| 11   | -1,52            | 0,10 | 27 | -1,67         | 0,19 | 15 |
| 14   | -1,78            | 0,08 | 27 | -1,73         | 0,18 | 15 |
| 21   | -1,93            | 0,05 | 27 | -1,93         | 0,15 | 15 |

# Headache

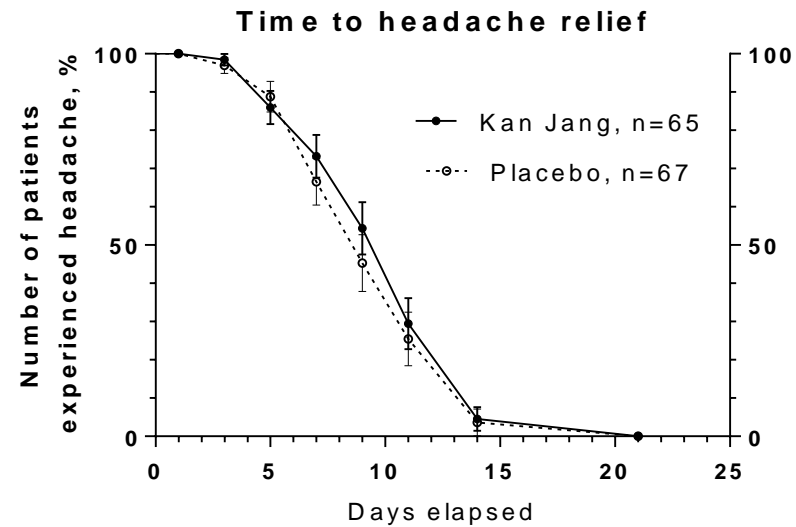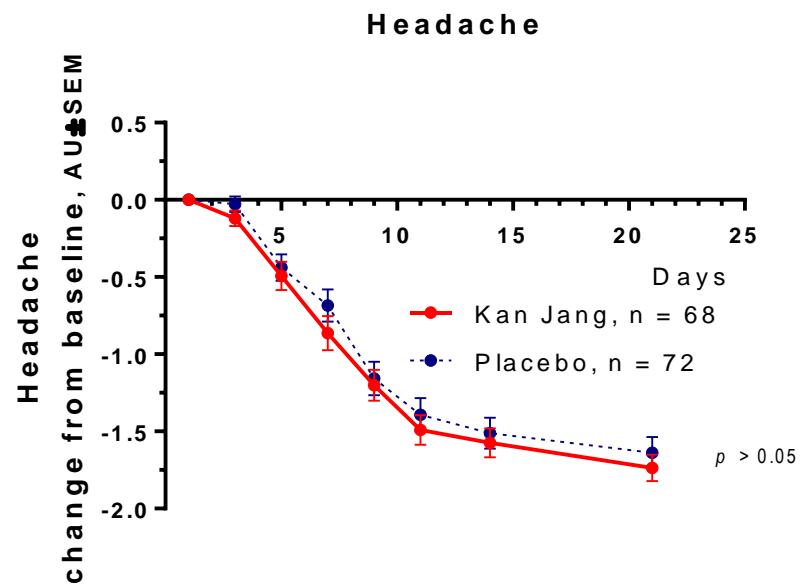

## ITT analysis in 140 patients

| Days | Kan Jang, n = 68 |       |    | Placebo, n=72 |       |    |
|------|------------------|-------|----|---------------|-------|----|
|      | Mean             | SD    | n  | Mean          | SD    | n  |
| 1    | 0                | 0     | 68 | 0             | 0     | 72 |
| 3    | -0,119           | 0,050 | 67 | -0,028        | 0,049 | 71 |
| 5    | -0,493           | 0,091 | 67 | -0,439        | 0,087 | 66 |
| 7    | -0,864           | 0,112 | 59 | -0,683        | 0,105 | 60 |
| 9    | -1,200           | 0,102 | 55 | -1,157        | 0,110 | 51 |
| 11   | -1,491           | 0,097 | 55 | -1,392        | 0,109 | 51 |
| 14   | -1,574           | 0,094 | 54 | -1,511        | 0,100 | 47 |
| 21   | -1,736           | 0,086 | 53 | -1,638        | 0,103 | 47 |

# Headache

## PP analysis in 100 patients

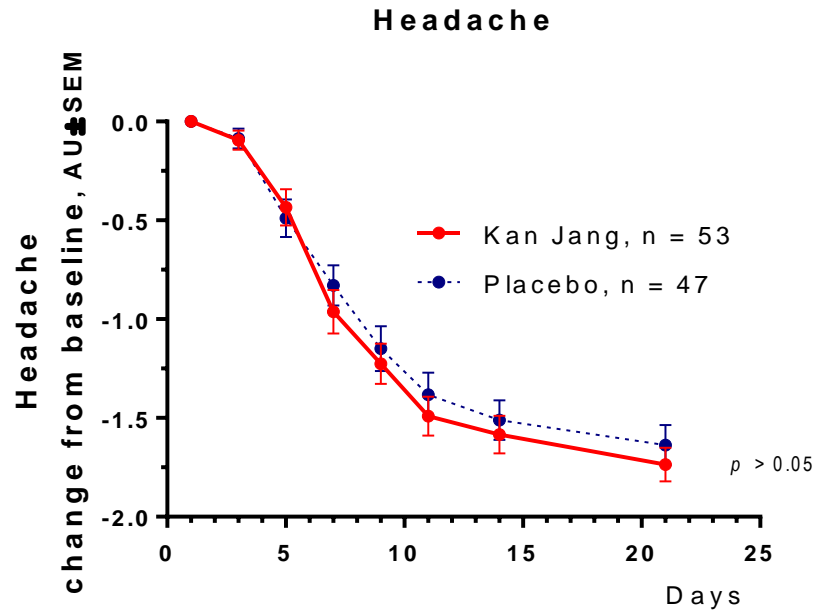

| Days | Kan Jang, n = 53 |       |    | Placebo, n=47 |       |    |
|------|------------------|-------|----|---------------|-------|----|
|      | Mean             | SD    | n  | Mean          | SD    | n  |
| 1    | 0                | 0     | 53 | 0             | 0     | 47 |
| 3    | -0,094           | 0,049 | 53 | -0,085        | 0,051 | 47 |
| 5    | -0,434           | 0,091 | 53 | -0,489        | 0,096 | 47 |
| 7    | -0,962           | 0,111 | 53 | -0,830        | 0,102 | 47 |
| 9    | -1,226           | 0,103 | 53 | -1,149        | 0,114 | 47 |
| 11   | -1,491           | 0,099 | 53 | -1,383        | 0,112 | 47 |
| 14   | -1,585           | 0,095 | 53 | -1,511        | 0,100 | 47 |
| 21   | -1,736           | 0,086 | 53 | -1,638        | 0,103 | 47 |

# Headache

## ITT analysis in a subgroup of 54 patients

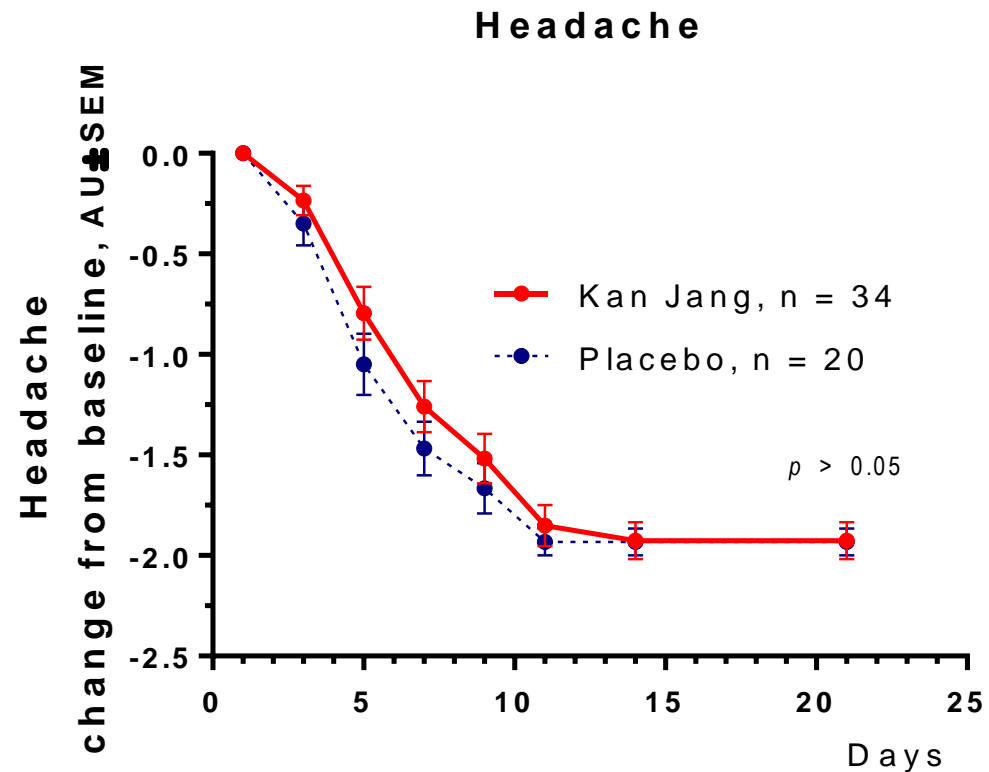

| Days | Kan Jang, n = 34 |       |    | Placebo, n=20 |       |    |
|------|------------------|-------|----|---------------|-------|----|
|      | Mean             | SD    | n  | Mean          | SD    | n  |
| 1    | 0                | 0     | 34 | 0             | 0     | 20 |
| 3    | -0,235           | 0,074 | 34 | -0,350        | 0,109 | 20 |
| 5    | -0,794           | 0,132 | 34 | -1,050        | 0,153 | 20 |
| 7    | -1,259           | 0,126 | 27 | -1,467        | 0,133 | 15 |
| 9    | -1,519           | 0,124 | 27 | -1,667        | 0,126 | 15 |
| 11   | -1,852           | 0,103 | 27 | -1,933        | 0,067 | 15 |
| 14   | -1,926           | 0,091 | 27 | -1,933        | 0,067 | 15 |
| 21   | -1,926           | 0,091 | 27 | -1,933        | 0,067 | 15 |

# Headache

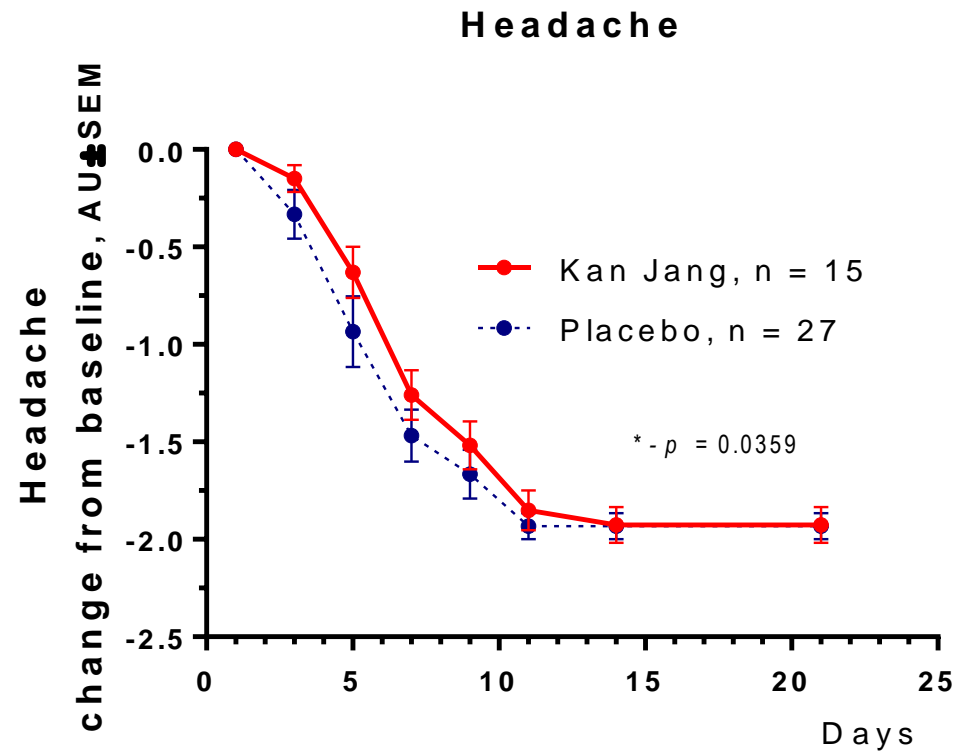

## PP analysis in a subgroup of 42 patients

| Days | Kan Jang, n = 27 |       |    | Placebo, n=15 |       |    |
|------|------------------|-------|----|---------------|-------|----|
|      | Mean             | SD    | n  | Mean          | SD    | n  |
| 1    | 0                | 0     | 27 | 0             | 0     | 15 |
| 3    | -0,148           | 0,070 | 27 | -0,333        | 0,126 | 15 |
| 5    | -0,630           | 0,132 | 27 | -0,933        | 0,182 | 15 |
| 7    | -1,259           | 0,126 | 27 | -1,467        | 0,133 | 15 |
| 9    | -1,519           | 0,124 | 27 | -1,667        | 0,126 | 15 |
| 11   | -1,852           | 0,103 | 27 | -1,933        | 0,067 | 15 |
| 14   | -1,926           | 0,091 | 27 | -1,933        | 0,067 | 15 |
| 21   | -1,926           | 0,091 | 27 | -1,933        | 0,067 | 15 |

# Loss of taste

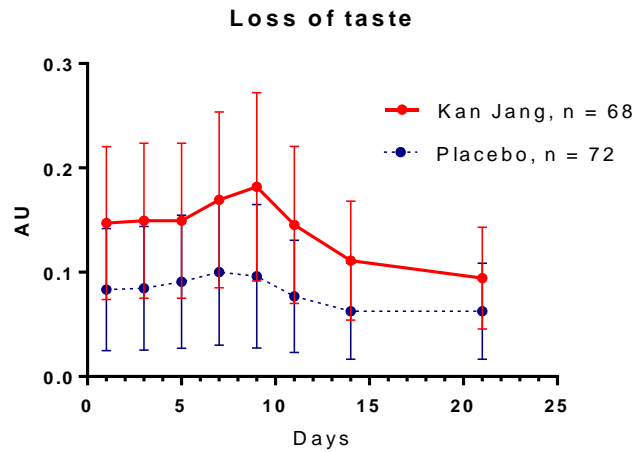

## ITT analysis in 140 patients

| Days | Kan Jang, n = 68 |       |    | Placebo, n=72 |       |    |
|------|------------------|-------|----|---------------|-------|----|
|      | Mean             | SD    | n  | Mean          | SD    | n  |
| 1    | 0                | 0     | 68 | 0             | 0     | 72 |
| 3    | 0                | 0     | 67 | 0             | 0     | 71 |
| 5    | 0                | 0     | 67 | 0             | 0     | 66 |
| 7    | 0                | 0     | 59 | 0             | 0     | 60 |
| 9    | 0                | 0     | 55 | -0,019        | 0,019 | 52 |
| 11   | -0,036           | 0,025 | 55 | -0,038        | 0,027 | 52 |
| 14   | -0,074           | 0,036 | 54 | -0,063        | 0,046 | 48 |
| 21   | -0,094           | 0,049 | 53 | -0,063        | 0,046 | 48 |

Change from baseline, Day X - Day 1

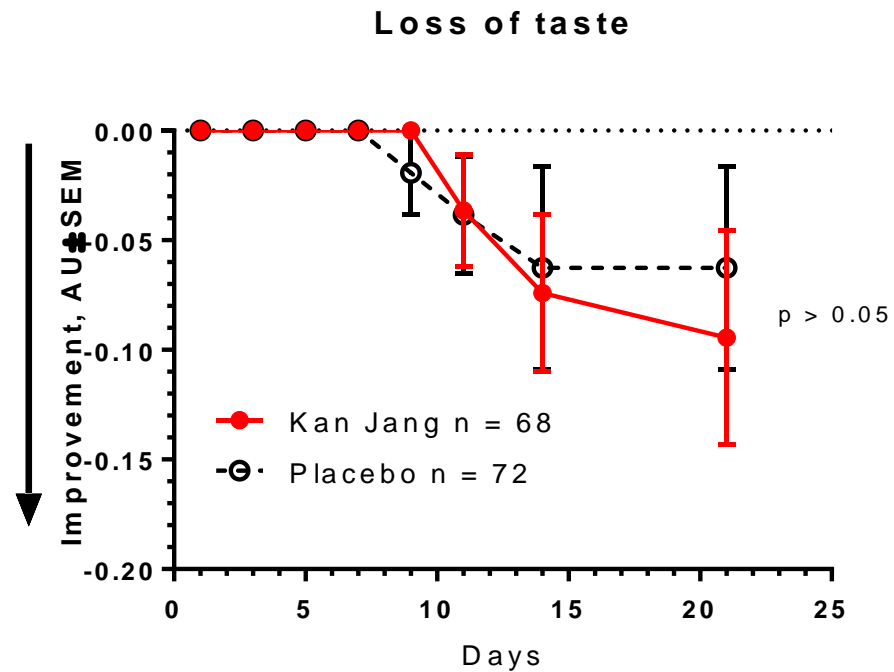

# Loss of taste

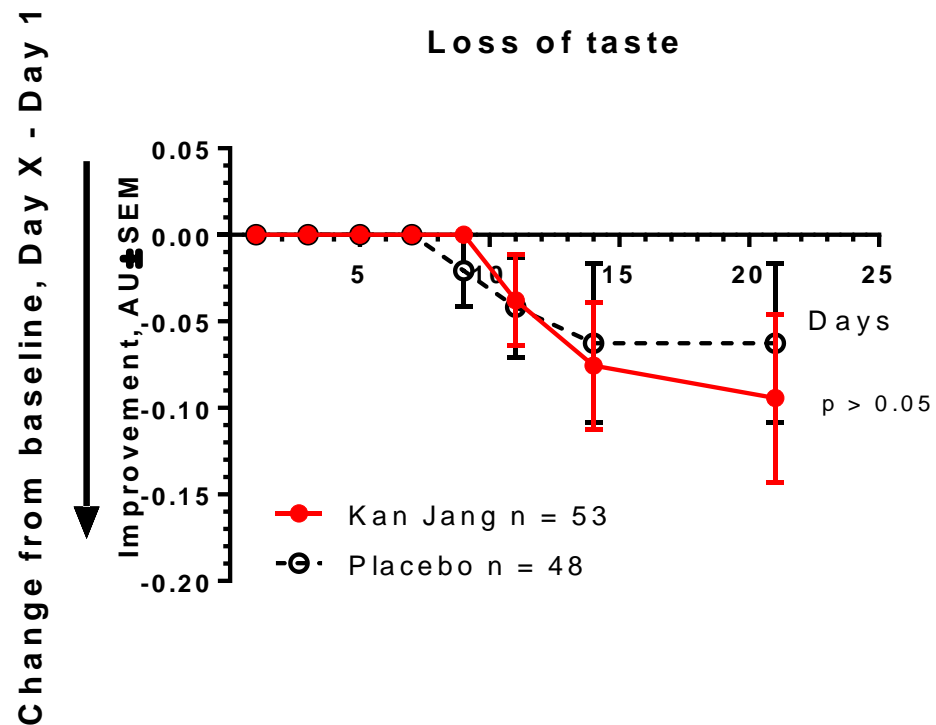

## PP analysis in 101 patients

| Days | Kan Jang, n = 53 |       |    | Placebo, n=47 |       |    |
|------|------------------|-------|----|---------------|-------|----|
|      | Mean             | SD    | n  | Mean          | SD    | n  |
| 1    | 0                | 0     | 53 | 0             | 0     | 48 |
| 3    | 0                | 0     | 53 | 0             | 0     | 48 |
| 5    | 0                | 0     | 53 | 0             | 0     | 48 |
| 7    | 0                | 0     | 53 | 0             | 0     | 48 |
| 9    | 0                | 0     | 53 | -0,021        | 0,021 | 48 |
| 11   | -0,038           | 0,026 | 53 | -0,042        | 0,029 | 48 |
| 14   | -0,075           | 0,037 | 53 | -0,063        | 0,046 | 48 |
| 21   | -0,094           | 0,049 | 53 | -0,063        | 0,046 | 48 |

# Loss of taste

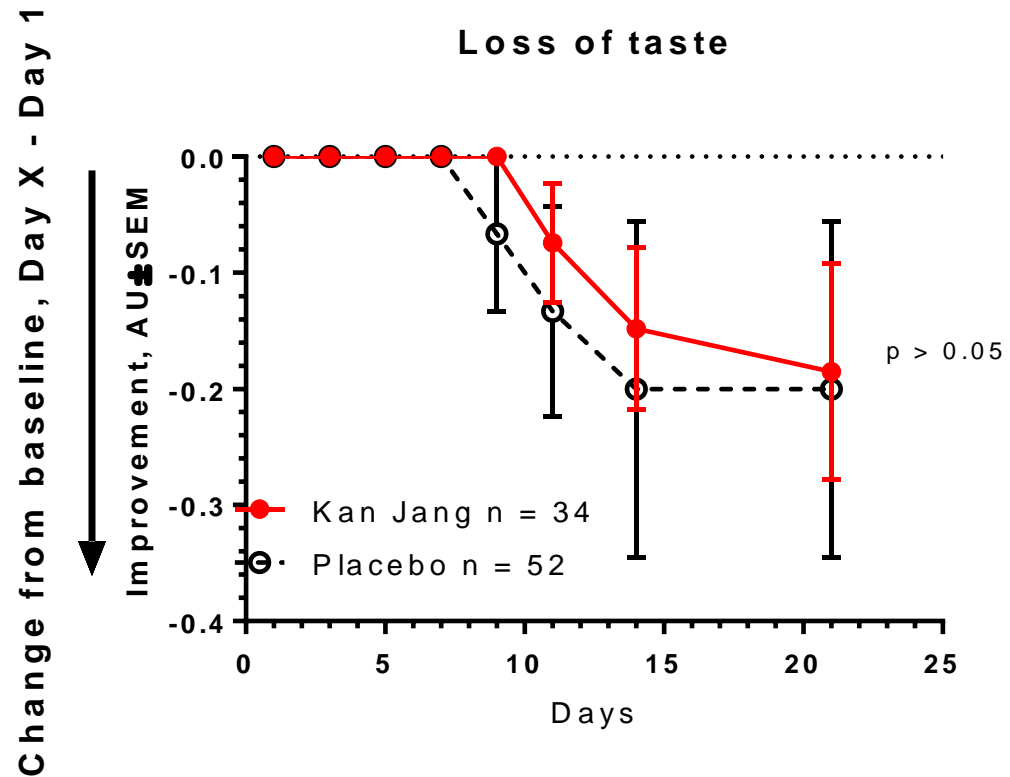

## ITT analysis in a subgroup of 54 patients

| Days | Kan Jang, n = 34 |       |    | Placebo, n=20 |       |    |
|------|------------------|-------|----|---------------|-------|----|
|      | Mean             | SD    | n  | Mean          | SD    | n  |
| 1    | 0                | 0     | 34 | 0             | 0     | 20 |
| 3    | 0                | 0     | 34 | 0             | 0     | 20 |
| 5    | 0                | 0     | 34 | 0             | 0     | 20 |
| 7    | 0                | 0     | 27 | 0             | 0     | 15 |
| 9    | 0                | 0     | 27 | -0,067        | 0,067 | 15 |
| 11   | -0,074           | 0,051 | 27 | -0,133        | 0,091 | 15 |
| 14   | -0,148           | 0,070 | 27 | -0,200        | 0,145 | 15 |
| 21   | -0,185           | 0,093 | 27 | -0,200        | 0,145 | 15 |

# Loss of taste

Change from baseline, Day X - Day 1

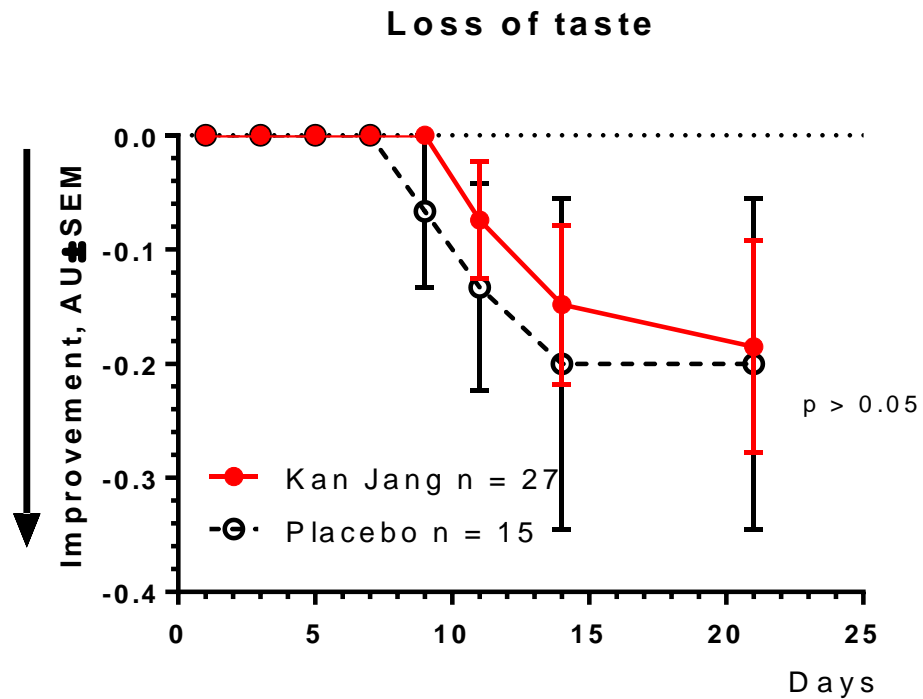

## PP analysis in a subgroup of 42 patients

| Days | Kan Jang, n = 27 |       |    | Placebo, n=15 |       |    |
|------|------------------|-------|----|---------------|-------|----|
|      | Mean             | SD    | n  | Mean          | SD    | n  |
| 1    | 0                | 0     | 27 | 0             | 0     | 15 |
| 3    | 0                | 0     | 27 | 0             | 0     | 15 |
| 5    | 0                | 0     | 27 | 0             | 0     | 15 |
| 7    | 0                | 0     | 27 | 0             | 0     | 15 |
| 9    | 0                | 0     | 27 | -0,067        | 0,067 | 15 |
| 11   | -0,074           | 0,051 | 27 | -0,133        | 0,091 | 15 |
| 14   | -0,148           | 0,070 | 27 | -0,200        | 0,145 | 15 |
| 21   | -0,185           | 0,093 | 27 | -0,200        | 0,145 | 15 |

# Loss of smell

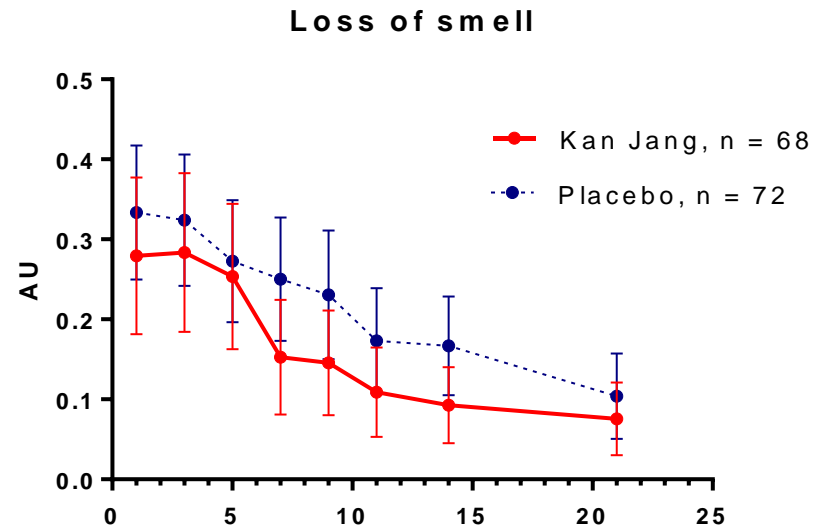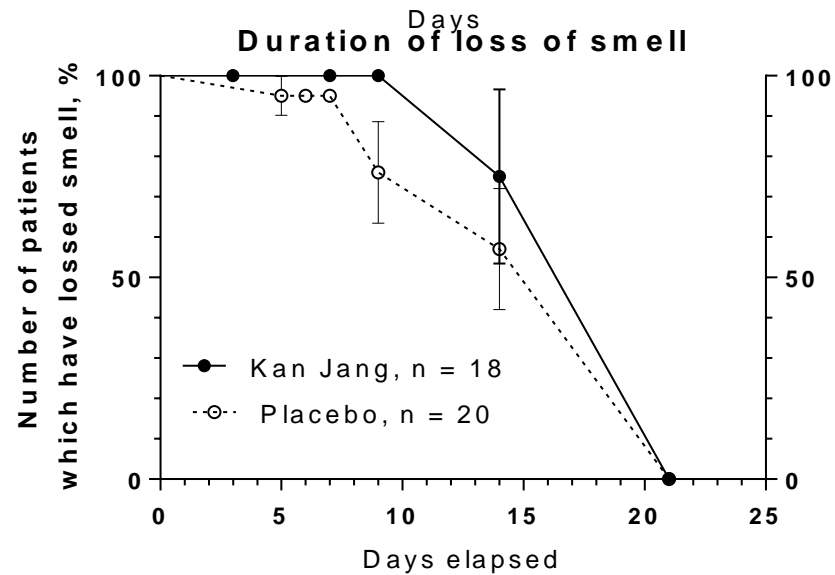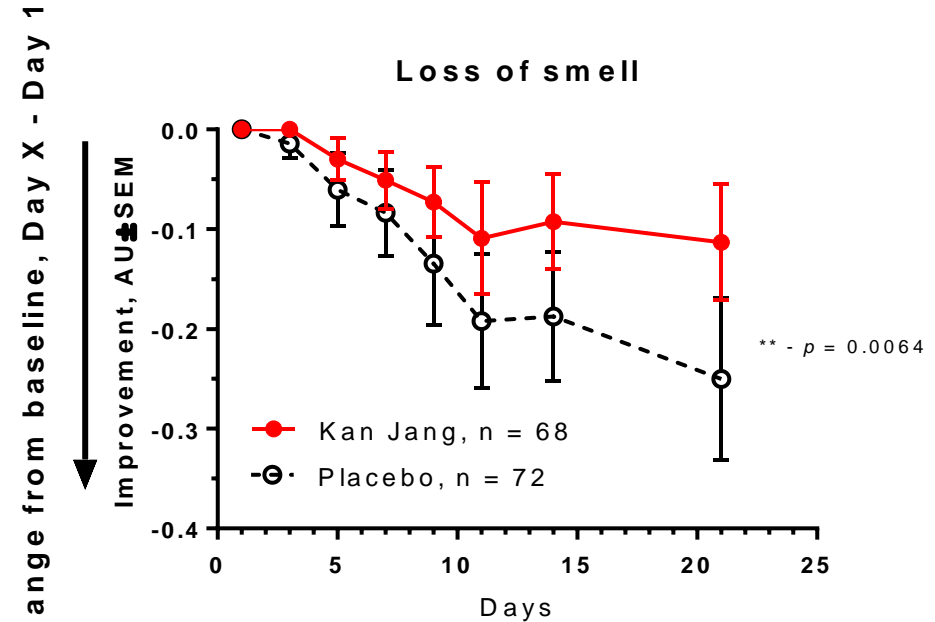

ITT analysis in 140 patients

| Days | Kan Jang, n = 68 |      |    | Placebo, n=72 |      |    |
|------|------------------|------|----|---------------|------|----|
|      | Mean             | SD   | n  | Mean          | SD   | n  |
| 1    | 0                | 0    | 68 | 0             | 0    | 72 |
| 3    | 0                | 0    | 67 | -0,01         | 0,01 | 71 |
| 5    | -0,03            | 0,02 | 67 | -0,06         | 0,04 | 66 |
| 7    | -0,05            | 0,03 | 59 | -0,08         | 0,04 | 60 |
| 9    | -0,07            | 0,04 | 55 | -0,13         | 0,06 | 52 |
| 11   | -0,11            | 0,06 | 55 | -0,19         | 0,07 | 52 |
| 14   | -0,09            | 0,05 | 54 | -0,19         | 0,06 | 48 |
| 21   | -0,11            | 0,06 | 53 | -0,25         | 0,08 | 48 |

# Loss of smell

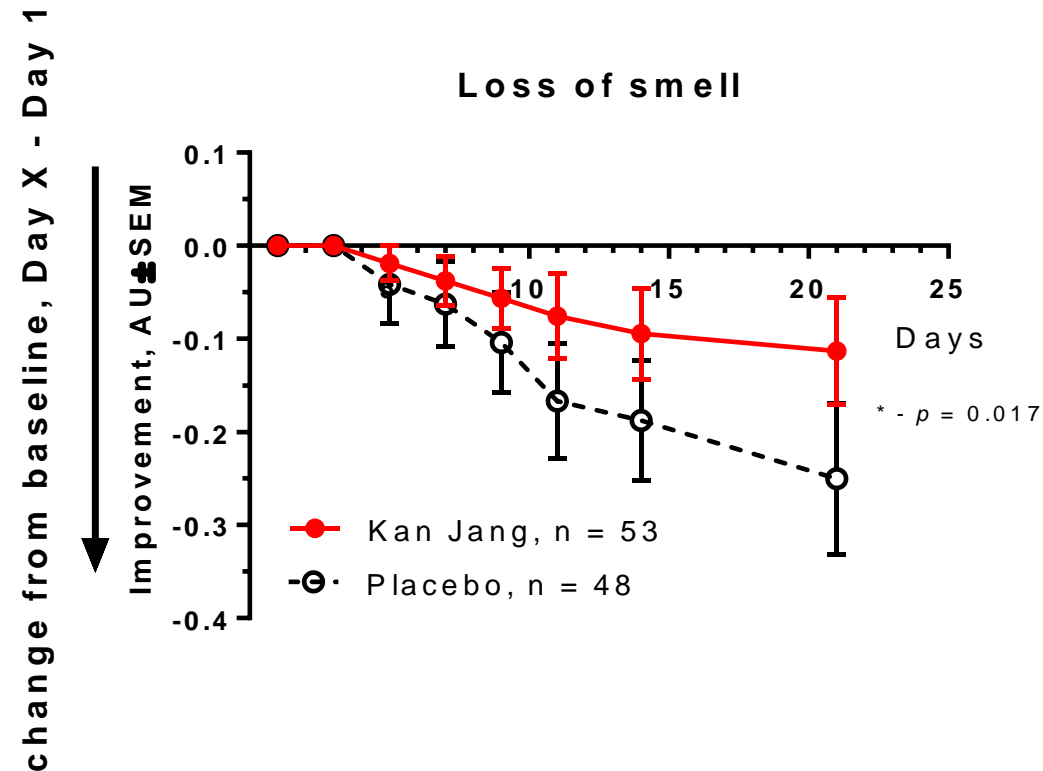

## PP analysis in 101 patients

| Days | Kan Jang, n = 53 |       |    | Placebo, n=47 |       |    |
|------|------------------|-------|----|---------------|-------|----|
|      | Mean             | SD    | n  | Mean          | SD    | n  |
| 1    | 0                | 0     | 53 | 0             | 0     | 48 |
| 3    | 0                | 0     | 53 | 0             | 0     | 48 |
| 5    | -0,019           | 0,019 | 53 | -0,042        | 0,042 | 48 |
| 7    | -0,038           | 0,026 | 53 | -0,063        | 0,046 | 48 |
| 9    | -0,057           | 0,032 | 53 | -0,104        | 0,054 | 48 |
| 11   | -0,075           | 0,045 | 53 | -0,167        | 0,062 | 48 |
| 14   | -0,094           | 0,049 | 53 | -0,188        | 0,064 | 48 |
| 21   | -0,113           | 0,058 | 53 | -0,250        | 0,082 | 48 |

# Loss of smell

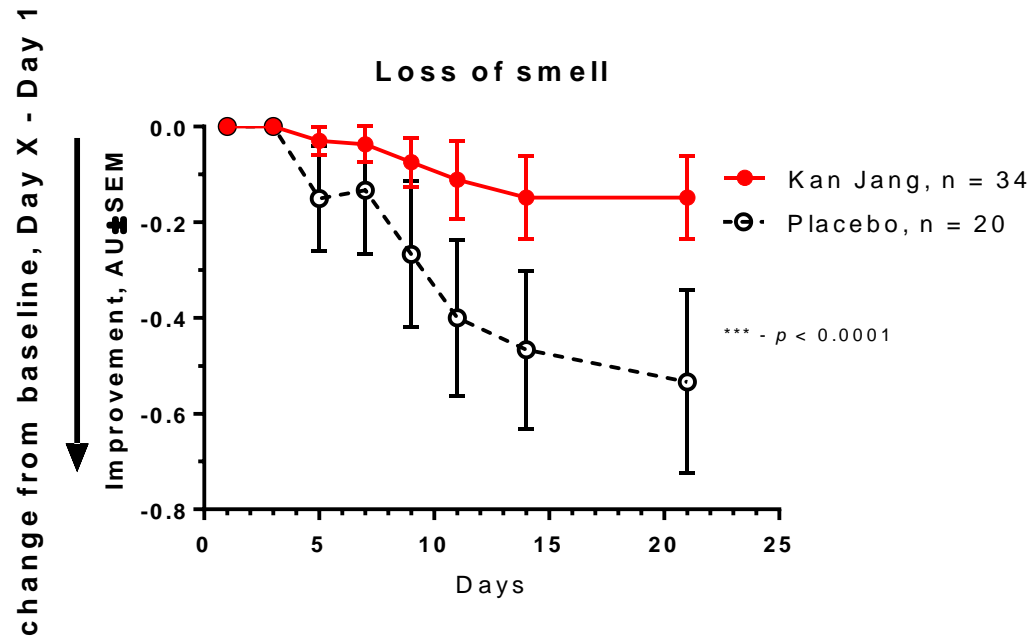

## ITT analysis in a subgroup of 54 patients

| Days | Kan Jang, n = 34 |       |    | Placebo, n=20 |       |    |
|------|------------------|-------|----|---------------|-------|----|
|      | Mean             | SD    | n  | Mean          | SD    | n  |
| 1    | 0                | 0     | 34 | 0             | 0     | 20 |
| 3    | 0                | 0     | 34 | 0             | 0     | 20 |
| 5    | -0,029           | 0,029 | 34 | -0,150        | 0,109 | 20 |
| 7    | -0,037           | 0,037 | 27 | -0,133        | 0,133 | 15 |
| 9    | -0,074           | 0,051 | 27 | -0,267        | 0,153 | 15 |
| 11   | -0,111           | 0,082 | 27 | -0,400        | 0,163 | 15 |
| 14   | -0,148           | 0,088 | 27 | -0,467        | 0,165 | 15 |
| 21   | -0,148           | 0,088 | 27 | -0,533        | 0,192 | 15 |

# Loss of smell

change from baseline, Day X - Day 1

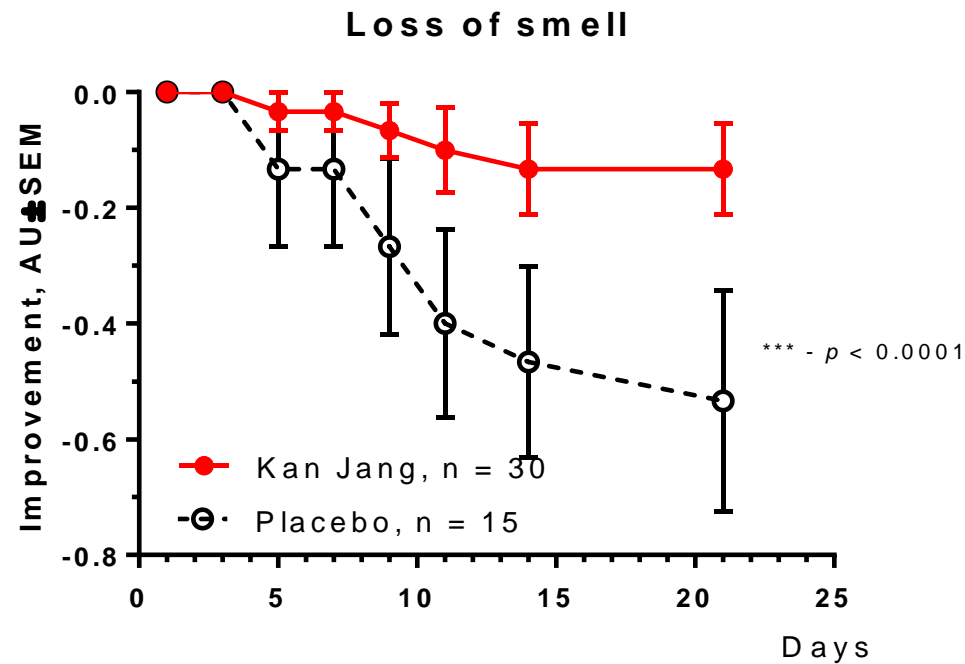

## PP analysis in a subgroup of 45 patients

| Days | Kan Jang, n = 27 |       |    | Placebo, n=15 |      |    |
|------|------------------|-------|----|---------------|------|----|
|      | Mean             | SD    | n  | Mean          | SD   | n  |
| 1    | 0                | 0     | 30 | 0             | 0    | 15 |
| 3    | 0                | 0     | 30 | 0             | 0    | 15 |
| 5    | -0,033           | 0,033 | 30 | -0,13         | 0,13 | 15 |
| 7    | -0,033           | 0,033 | 30 | -0,13         | 0,13 | 15 |
| 9    | -0,067           | 0,046 | 30 | -0,27         | 0,15 | 15 |
| 11   | -0,100           | 0,074 | 30 | -0,40         | 0,16 | 15 |
| 14   | -0,133           | 0,079 | 30 | -0,47         | 0,17 | 15 |
| 21   | -0,133           | 0,079 | 30 | -0,53         | 0,19 | 15 |

# Physical activity

## ITT analysis in 140 patients

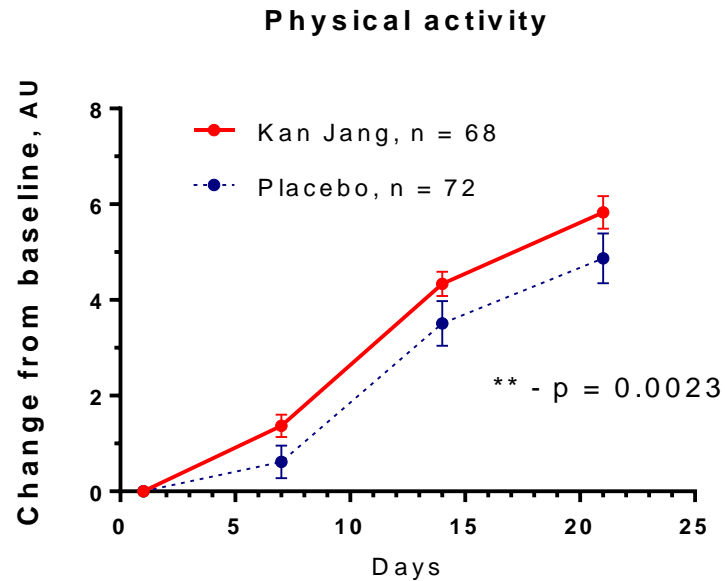

| Days | Kan Jang, n = 68 |       |    | Placebo, n=72 |       |    |
|------|------------------|-------|----|---------------|-------|----|
|      | Mean             | SD    | n  | Mean          | SD    | n  |
| 1    | 0                | 0     | 68 | 0             | 0     | 72 |
| 7    | 1,373            | 0,239 | 59 | 0,617         | 0,341 | 60 |
| 14   | 4,333            | 0,254 | 54 | 3,511         | 0,467 | 47 |
| 21   | 5,830            | 0,343 | 53 | 4,872         | 0,523 | 47 |

## PP analysis in 100 patients

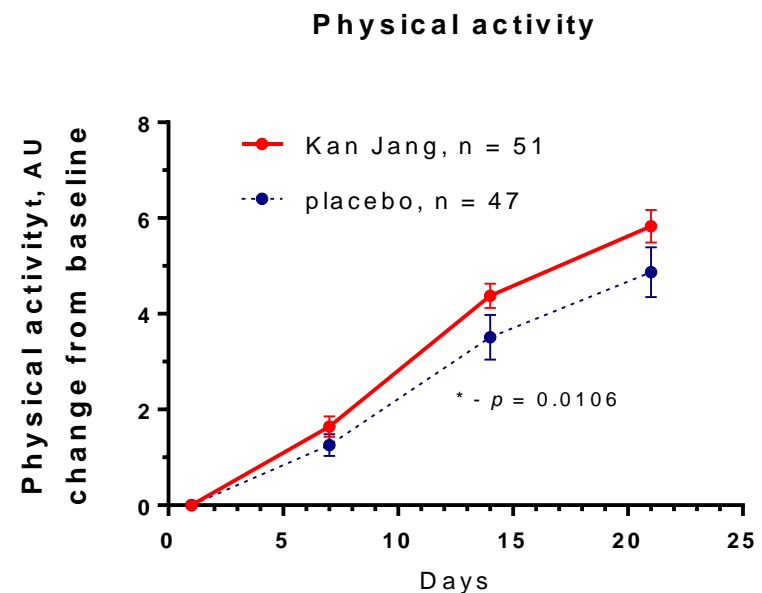

| Days | Kan Jang, n = 51 |       |    | Placebo, n=47 |       |    |
|------|------------------|-------|----|---------------|-------|----|
|      | Mean             | SD    | n  | Mean          | SD    | n  |
| 1    | 0                | 0     | 53 | 0             | 0     | 47 |
| 7    | 1,642            | 0,217 | 53 | 1,255         | 0,231 | 47 |
| 14   | 4,377            | 0,254 | 53 | 3,511         | 0,467 | 47 |
| 21   | 5,830            | 0,343 | 53 | 4,872         | 0,523 | 47 |

# Workout

## ITT analysis in 140 patients

| Days | Kan Jang, n = 68 |       |    | Placebo, n=72 |       |    |
|------|------------------|-------|----|---------------|-------|----|
|      | Mean             | SD    | n  | Mean          | SD    | n  |
| 1    | 0                | 0     | 68 | 0             | 0     | 72 |
| 7    | 5,254            | 1,124 | 59 | 1,333         | 1,411 | 60 |
| 14   | 12,315           | 0,733 | 54 | 10,426        | 1,052 | 47 |
| 21   | 19,434           | 0,837 | 53 | 17,340        | 1,234 | 47 |

## PP analysis in 100 patients

| Days | Kan Jang, n = 53 |       |    | Placebo, n=47 |       |    |
|------|------------------|-------|----|---------------|-------|----|
|      | Mean             | SD    | n  | Mean          | SD    | n  |
| 1    | 0                | 0     | 53 | 0             | 0     | 47 |
| 7    | 1,642            | 0,217 | 53 | 1,255         | 0,231 | 47 |
| 14   | 4,377            | 0,254 | 53 | 3,511         | 0,467 | 47 |
| 21   | 5,830            | 0,343 | 53 | 4,872         | 0,523 | 47 |

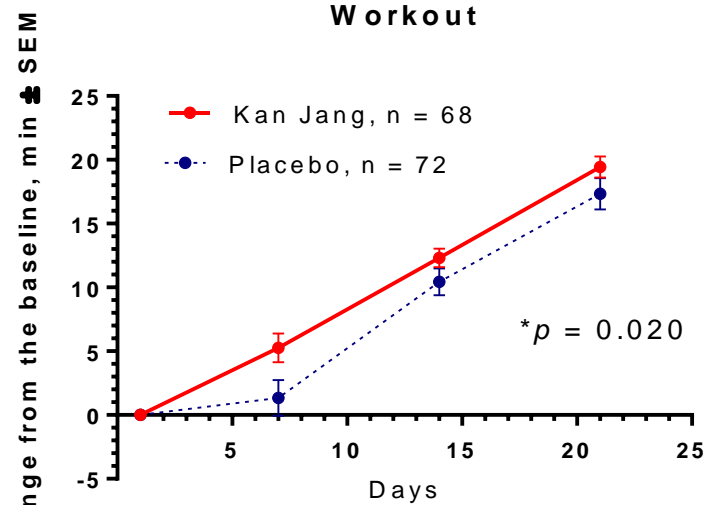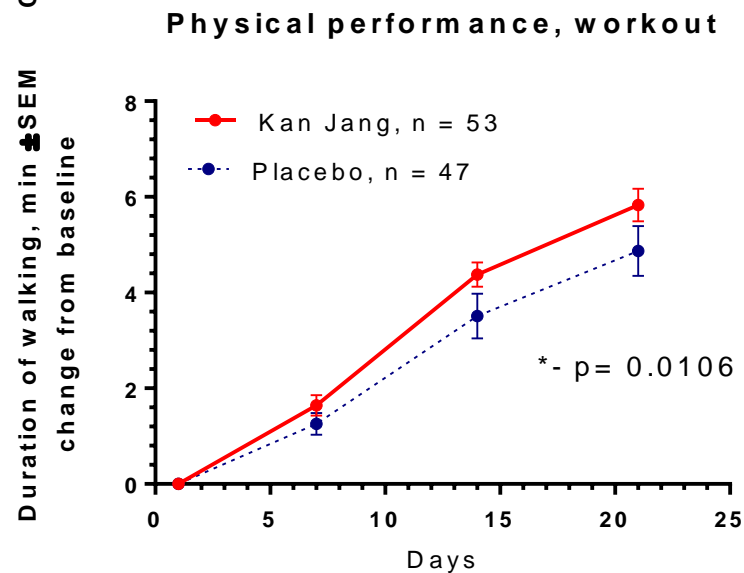

# Cognitive performance

## ITT analysis in 140 patients

| Days | Kan Jang, n = 27 |       |    | Placebo, n=15 |       |    |
|------|------------------|-------|----|---------------|-------|----|
|      | Mean             | SD    | n  | Mean          | SD    | n  |
| 1    | 0                | 0     | 68 | 0             | 0     | 72 |
| 7    | 4,642            | 3,622 | 59 | 5,269         | 1,481 | 60 |
| 14   | 8,758            | 3,201 | 55 | 11,227        | 1,966 | 47 |
| 21   | 11,305           | 3,286 | 54 | 13,201        | 2,026 | 47 |

## PP analysis in 100 patients

| Days | Kan Jang, n = 27 |       |    | Placebo, n=15 |       |    |
|------|------------------|-------|----|---------------|-------|----|
|      | Mean             | SD    | n  | Mean          | SD    | n  |
| 1    | 0                | 0     | 53 | 0             | 0     | 47 |
| 7    | 1,642            | 0,217 | 53 | 1,255         | 0,231 | 47 |
| 14   | 4,377            | 0,254 | 53 | 3,511         | 0,467 | 47 |
| 21   | 5,830            | 0,343 | 53 | 4,872         | 0,523 | 47 |

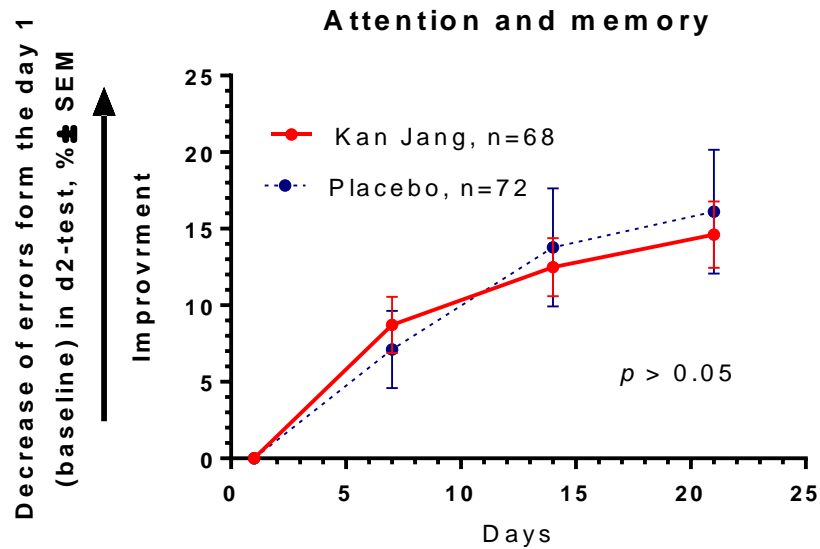

# Respiratory symptoms

## ITT analysis in 140 patients

| Days | Kan Jang, n = 27 |       |    | Placebo, n=15 |       |    |
|------|------------------|-------|----|---------------|-------|----|
|      | Mean             | SD    | n  | Mean          | SD    | n  |
| 1    | 0                | 0     | 68 | 0             | 0     | 72 |
| 3    | -1,716           | 0,369 | 67 | -1,141        | 0,446 | 71 |
| 7    | -7,983           | 0,900 | 59 | -6,417        | 0,937 | 60 |
| 14   | -15,963          | 0,936 | 54 | -14,348       | 0,923 | 46 |

## PP analysis in 100 patients

| Days | Kan Jang, n = 27 |       |    | Placebo, n=15 |       |    |
|------|------------------|-------|----|---------------|-------|----|
|      | Mean             | SD    | n  | Mean          | SD    | n  |
| 1    | 0                | 0     | 54 | 0             | 0     | 46 |
| 3    | -1,500           | 0,358 | 54 | -1,696        | 0,480 | 46 |
| 7    | -8,815           | 0,864 | 54 | -7,783        | 0,890 | 46 |
| 14   | -15,963          | 0,936 | 54 | -14,348       | 0,923 | 46 |

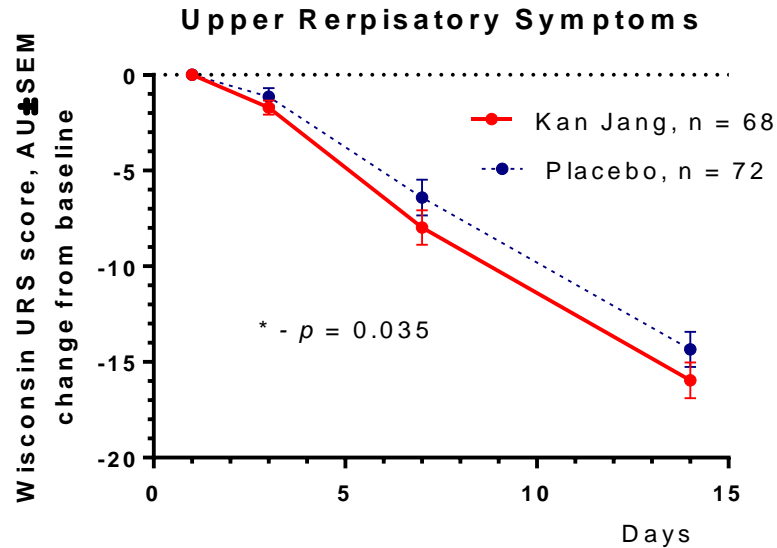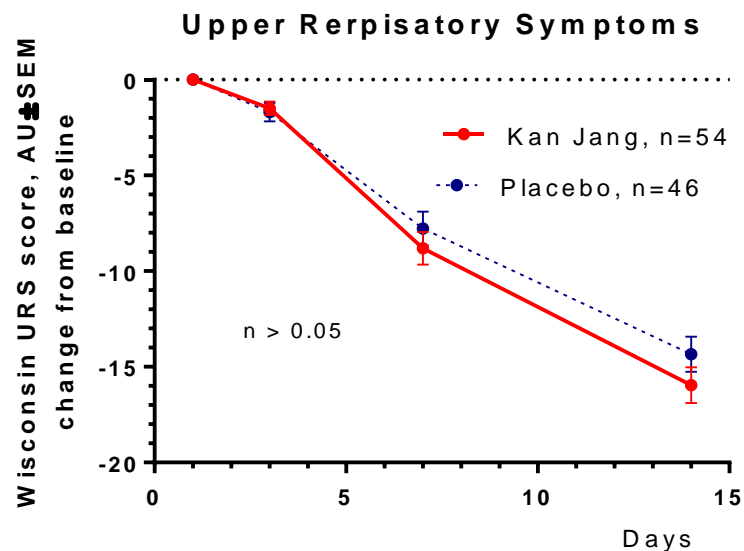

# Respiratory symptoms

## ITT analysis in a subgroup of 54 patients

| Days | Kan Jang, n = 27 |       |    | Placebo, n=15 |       |    |
|------|------------------|-------|----|---------------|-------|----|
|      | Mean             | SD    | n  | Mean          | SD    | n  |
| 1    | 0                | 0     | 68 | 0             | 0     | 72 |
| 7    | 1,373            | 0,239 | 59 | 0,617         | 0,341 | 60 |
| 14   | 4,333            | 0,254 | 54 | 3,511         | 0,467 | 47 |
| 21   | 5,830            | 0,343 | 53 | 4,872         | 0,523 | 47 |

## PP analysis in in a subgroup of 42 patients

| Days | Kan Jang, n = 27 |       |    | Placebo, n=15 |       |    |
|------|------------------|-------|----|---------------|-------|----|
|      | Mean             | SD    | n  | Mean          | SD    | n  |
| 1    | 0                | 0     | 53 | 0             | 0     | 47 |
| 7    | 1,642            | 0,217 | 53 | 1,255         | 0,231 | 47 |
| 14   | 4,377            | 0,254 | 53 | 3,511         | 0,467 | 47 |
| 21   | 5,830            | 0,343 | 53 | 4,872         | 0,523 | 47 |

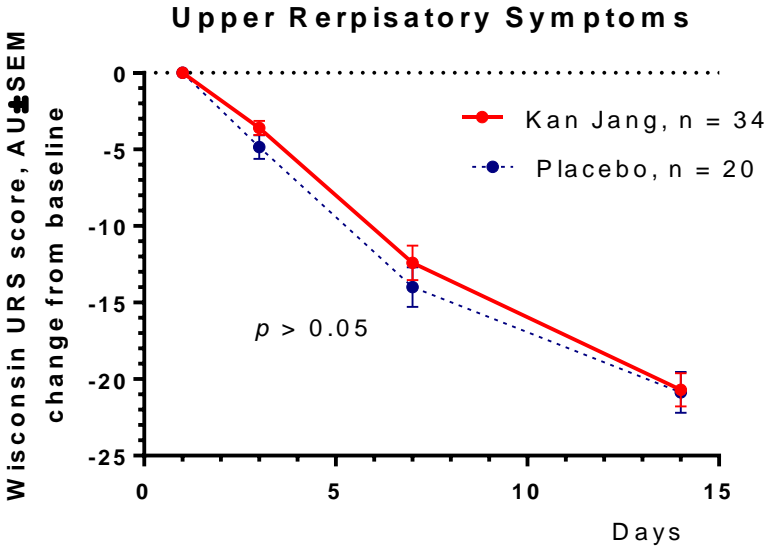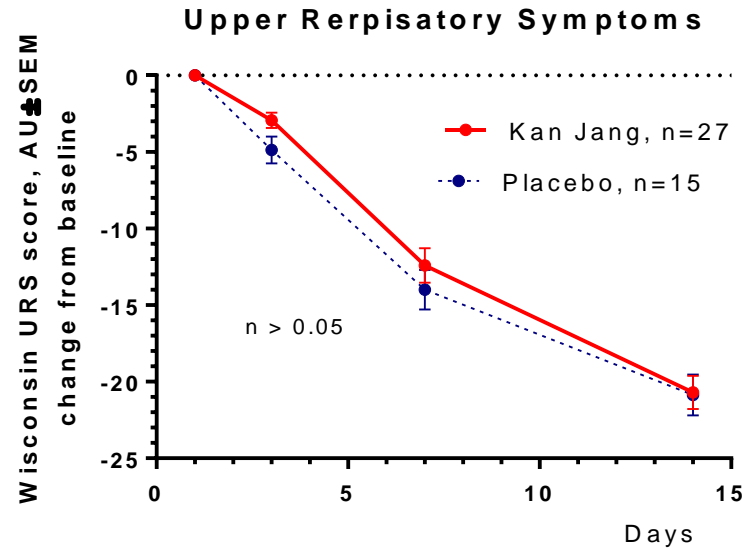

# Quality of life

## ITT analysis in 140 patients

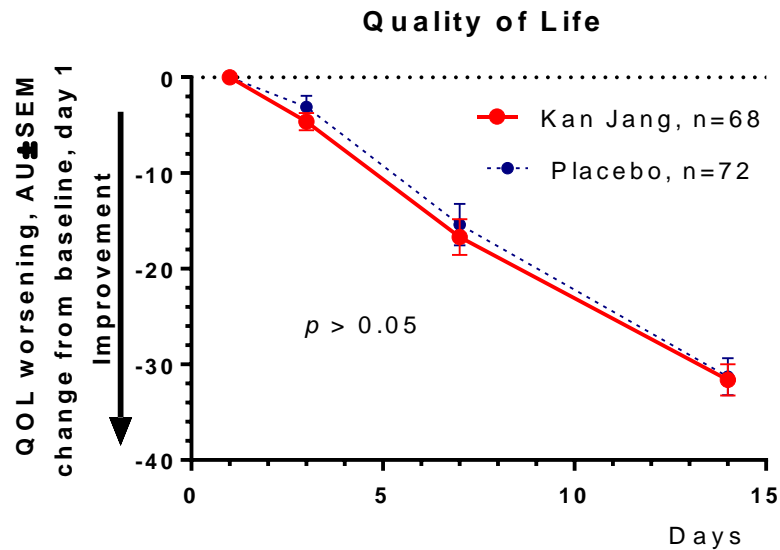

| Days | Kan Jang, n = 68 |       |    | Placebo, n=72 |       |    |
|------|------------------|-------|----|---------------|-------|----|
|      | Mean             | SD    | n  | Mean          | SD    | n  |
| 1    | 0                | 0     | 68 | 0             | 0     | 72 |
| 7    | 1,373            | 0,239 | 59 | 0,617         | 0,341 | 60 |
| 14   | 4,333            | 0,254 | 54 | 3,511         | 0,467 | 47 |
| 21   | 5,830            | 0,343 | 53 | 4,872         | 0,523 | 47 |

## PP analysis in 100 patients

| Days | Kan Jang, n = 27 |       |    | Placebo, n=15 |       |    |
|------|------------------|-------|----|---------------|-------|----|
|      | Mean             | SD    | n  | Mean          | SD    | n  |
| 1    | 0                | 0     | 53 | 0             | 0     | 47 |
| 7    | 1,642            | 0,217 | 53 | 1,255         | 0,231 | 47 |
| 14   | 4,377            | 0,254 | 53 | 3,511         | 0,467 | 47 |
| 21   | 5,830            | 0,343 | 53 | 4,872         | 0,523 | 47 |

# Inflammatory marker IL-6

## ITT analysis in 140 patients

| Days | Kan Jang, n = 68 |       |    | Placebo, n=72 |       |    |
|------|------------------|-------|----|---------------|-------|----|
|      | Mean             | SD    | n  | Mean          | SD    | n  |
| 1    | 12,60            | 54,29 | 68 | 9,39          | 17,86 | 72 |
| 3    | 5,59             | 9,87  | 66 | 7,39          | 12,83 | 71 |
| 7    | 4,88             | 7,09  | 59 | 6,57          | 12,77 | 60 |
| 14   | 2,37             | 2,60  | 54 | 2,84          | 5,01  | 47 |

## ITT analysis in 140 patients

| Days | Kan Jang, n = 27 |       |    | Placebo, n=15 |       |    |
|------|------------------|-------|----|---------------|-------|----|
|      | Mean             | SD    | n  | Mean          | SD    | n  |
| 1    | 0                | 0     | 68 | 0             | 0     | 72 |
| 3    | -7,235           | 6,788 | 66 | -0,554        | 0,970 | 70 |
| 7    | -8,702           | 7,471 | 59 | -0,103        | 2,131 | 60 |
| 14   | -11,575          | 8,257 | 54 | -2,646        | 1,037 | 47 |

Blood cytokine IL-6

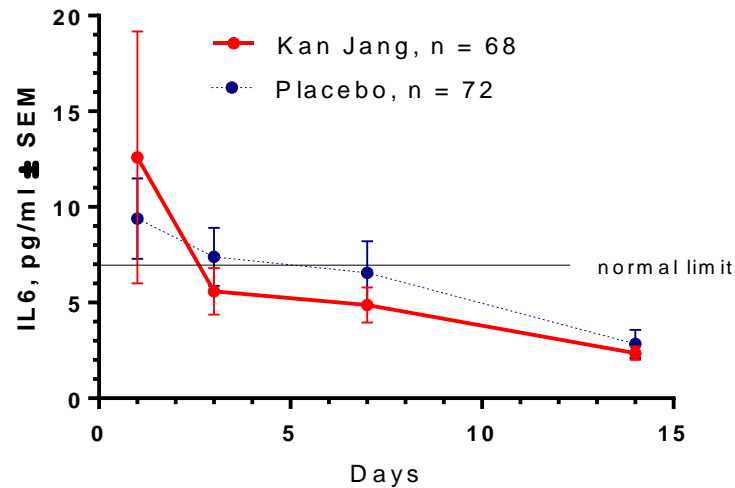

Cytokine IL-6

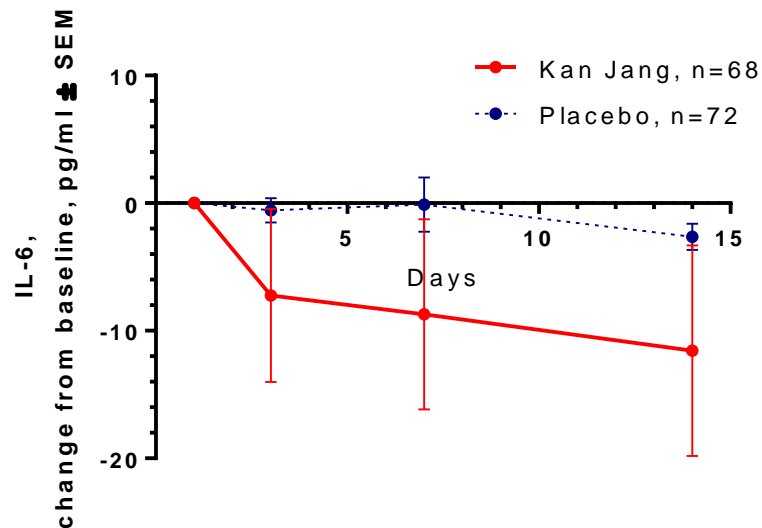

# Inflammatory marker IL-6

## PP analysis in 100 patients

| Days | Kan Jang, n = 54 |       |    | Placebo, n=46 |       |    |
|------|------------------|-------|----|---------------|-------|----|
|      | Mean             | SD    | n  | Mean          | SD    | n  |
| 1    | 0                | 0     | 54 | 0             | 0     | 46 |
| 3    | -9,238           | 8,243 | 54 | -1,712        | 0,536 | 46 |
| 7    | -10,677          | 8,101 | 54 | -1,168        | 1,206 | 46 |
| 14   | -11,575          | 8,257 | 54 | -2,229        | 0,970 | 46 |

## PP analysis in a subgroup of 42 patients

| Days | Kan Jang, n = 27 |       |    | Placebo, n=15 |       |    |
|------|------------------|-------|----|---------------|-------|----|
|      | Mean             | SD    | n  | Mean          | SD    | n  |
| 1    | 0                | 0     | 27 | 0             | 0     | 15 |
| 3    | -2,194           | 0,701 | 27 | -1,711        | 0,707 | 15 |
| 7    | -3,323           | 0,939 | 27 | -1,758        | 0,736 | 15 |
| 14   | -4,038           | 1,201 | 27 | -1,758        | 0,736 | 15 |

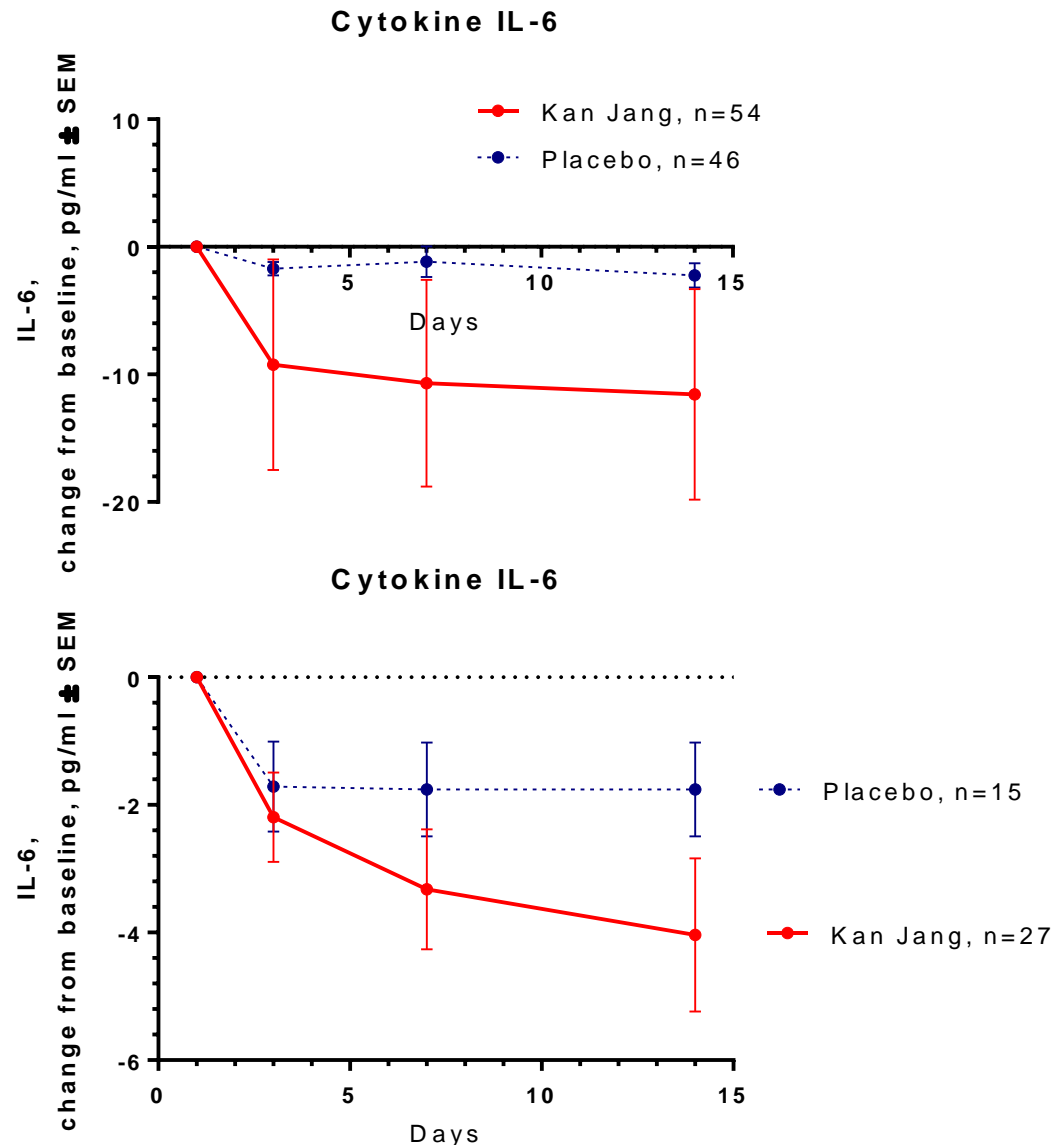

# Inflammatory marker D-dimer

## ITT analysis in 140 patients

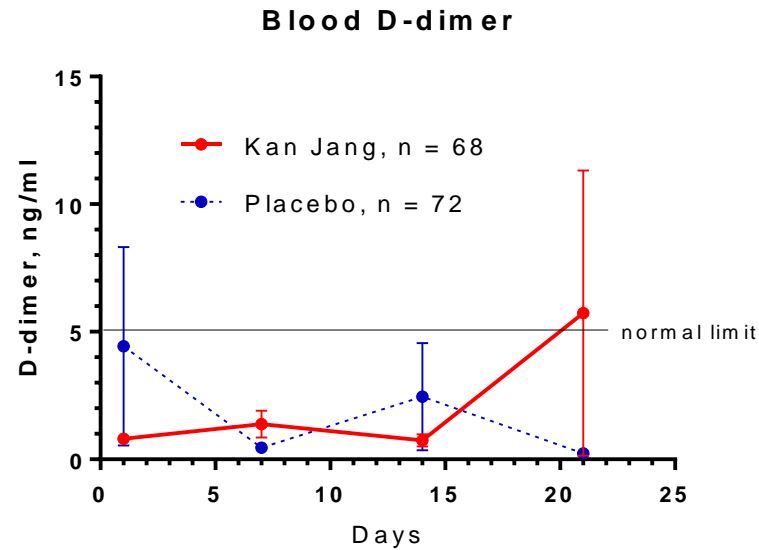

| Days | Kan Jang, n = 27 |       |    | Placebo, n=15 |       |    |
|------|------------------|-------|----|---------------|-------|----|
|      | Mean             | SD    | n  | Mean          | SD    | n  |
| 1    | 0                | 0     | 68 | 0             | 0     | 72 |
| 7    | 1,373            | 0,239 | 59 | 0,617         | 0,341 | 60 |
| 14   | 4,333            | 0,254 | 54 | 3,511         | 0,467 | 47 |
| 21   | 5,830            | 0,343 | 53 | 4,872         | 0,523 | 47 |

## PP analysis in 59 patients

| Days | Kan Jang, n = 27 |       |    | Placebo, n=15 |       |    |
|------|------------------|-------|----|---------------|-------|----|
|      | Mean             | SD    | n  | Mean          | SD    | n  |
| 1    | 0                | 0     | 53 | 0             | 0     | 47 |
| 7    | 1,642            | 0,217 | 53 | 1,255         | 0,231 | 47 |
| 14   | 4,377            | 0,254 | 53 | 3,511         | 0,467 | 47 |
| 21   | 5,830            | 0,343 | 53 | 4,872         | 0,523 | 47 |

# Inflammatory marker C-reactive protein

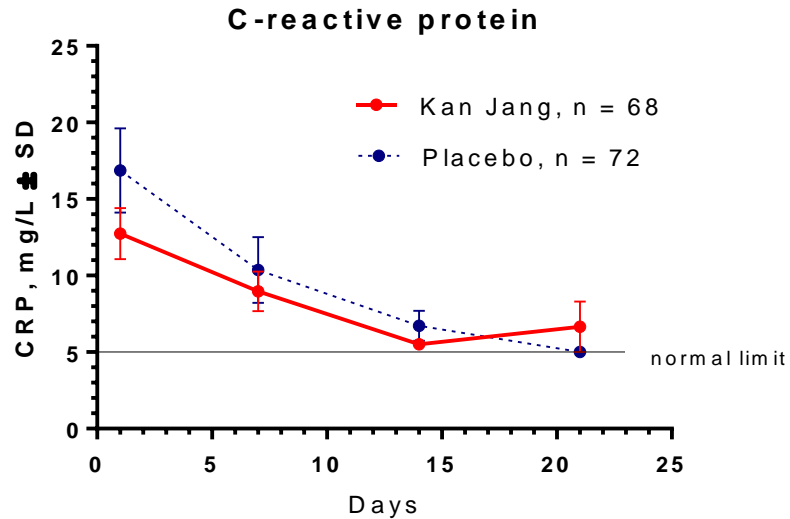

## ITT analysis in 140 patients

| Days | Kan Jang, n = 27 |       |    | Placebo, n=15 |       |    |
|------|------------------|-------|----|---------------|-------|----|
|      | Mean             | SD    | n  | Mean          | SD    | n  |
| 1    | 0                | 0     | 68 | 0             | 0     | 72 |
| 7    | 1,373            | 0,239 | 59 | 0,617         | 0,341 | 60 |
| 14   | 4,333            | 0,254 | 54 | 3,511         | 0,467 | 47 |
| 21   | 5,830            | 0,343 | 53 | 4,872         | 0,523 | 47 |

## PP analysis in 100 patients

| Days | Kan Jang, n = 27 |       |    | Placebo, n=15 |       |    |
|------|------------------|-------|----|---------------|-------|----|
|      | Mean             | SD    | n  | Mean          | SD    | n  |
| 1    | 0                | 0     | 53 | 0             | 0     | 47 |
| 7    | 1,642            | 0,217 | 53 | 1,255         | 0,231 | 47 |
| 14   | 4,377            | 0,254 | 53 | 3,511         | 0,467 | 47 |
| 21   | 5,830            | 0,343 | 53 | 4,872         | 0,523 | 47 |

# Body temperature

## ITT analysis in 140 patients

| Days | Kan Jang, n = 27 |       |    | Placebo, n=15 |       |    |
|------|------------------|-------|----|---------------|-------|----|
|      | Mean             | SD    | n  | Mean          | SD    | n  |
| 1    | 0                | 0     | 68 | 0             | 0     | 72 |
| 7    | 1,373            | 0,239 | 59 | 0,617         | 0,341 | 60 |
| 14   | 4,333            | 0,254 | 54 | 3,511         | 0,467 | 47 |
| 21   | 5,830            | 0,343 | 53 | 4,872         | 0,523 | 47 |

## PP analysis in 99 patients

| Days | Kan Jang, n = 27 |       |    | Placebo, n=15 |       |    |
|------|------------------|-------|----|---------------|-------|----|
|      | Mean             | SD    | n  | Mean          | SD    | n  |
| 1    | 0                | 0     | 53 | 0             | 0     | 47 |
| 7    | 1,642            | 0,217 | 53 | 1,255         | 0,231 | 47 |
| 14   | 4,377            | 0,254 | 53 | 3,511         | 0,467 | 47 |
| 21   | 5,830            | 0,343 | 53 | 4,872         | 0,523 | 47 |

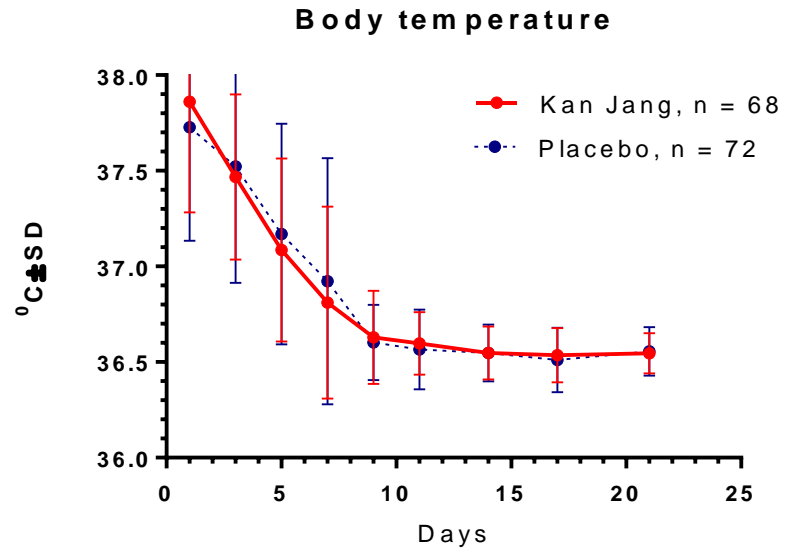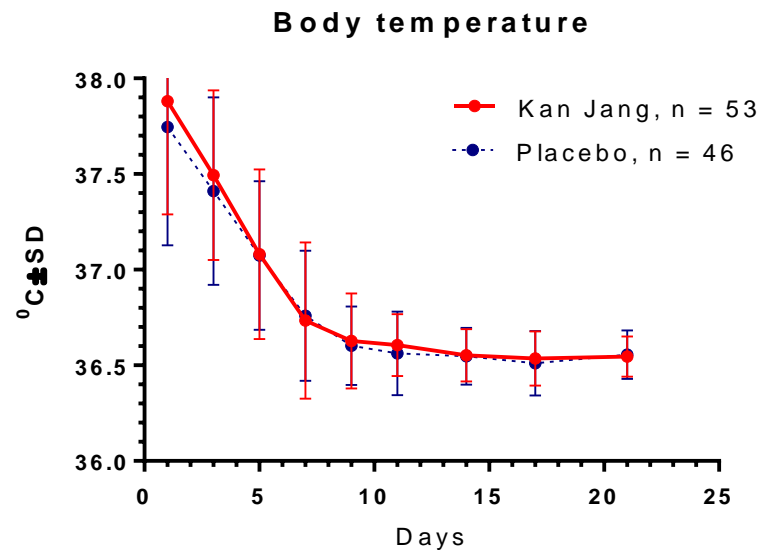

# Body temperature

Patients with body temperature

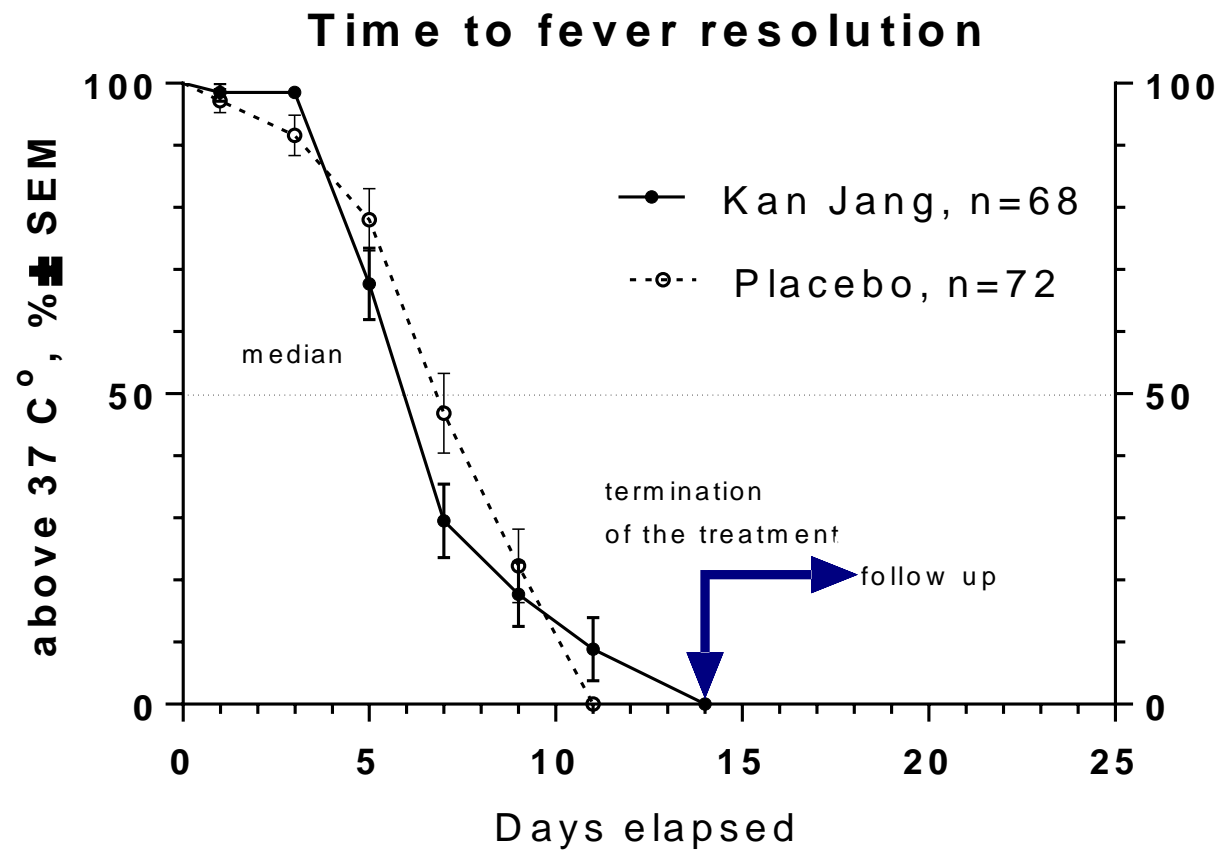

Time to fever resolution

| Days elapsed | Kan Jang, n=68 |       | Placebo, n=72 |       |
|--------------|----------------|-------|---------------|-------|
| 0            | 100            |       | 100           |       |
| 1            | 98,529         | 1,460 | 97,222        | 1,937 |
| 3            | 98,529         |       | 91,586        | 3,288 |
| 5            | 67,739         | 5,796 | 78,073        | 5,015 |
| 7            | 29,527         | 5,943 | 46,844        | 6,447 |
| 9            | 17,716         | 5,164 | 22,307        | 5,957 |
| 11           | 8,858          | 5,127 | 0,000         | 0,000 |
| 14           | 0              | 0     |               |       |

Is your test result significant? Does it have enough power?

Play with the controls and get a better feel for how a lower confidence level will boost the power or how an increase in test size can make a small CR-difference significant

Pre-test calculation or post-test evaluation?

☐ Pre-test analysis

☒ Test evaluation

Test data

Visitors A: 68 Conversions A: 39

Visitors B: 72 Conversions B: 45

Apply changes

Settings

Hypothesis  $H_0$

☒ One-sided

☐ Two-sided

Confidence  $1-\alpha$

☐ 90%

☒ 95%

☐ 99%

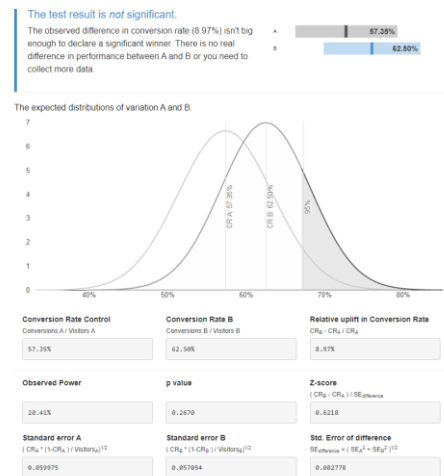

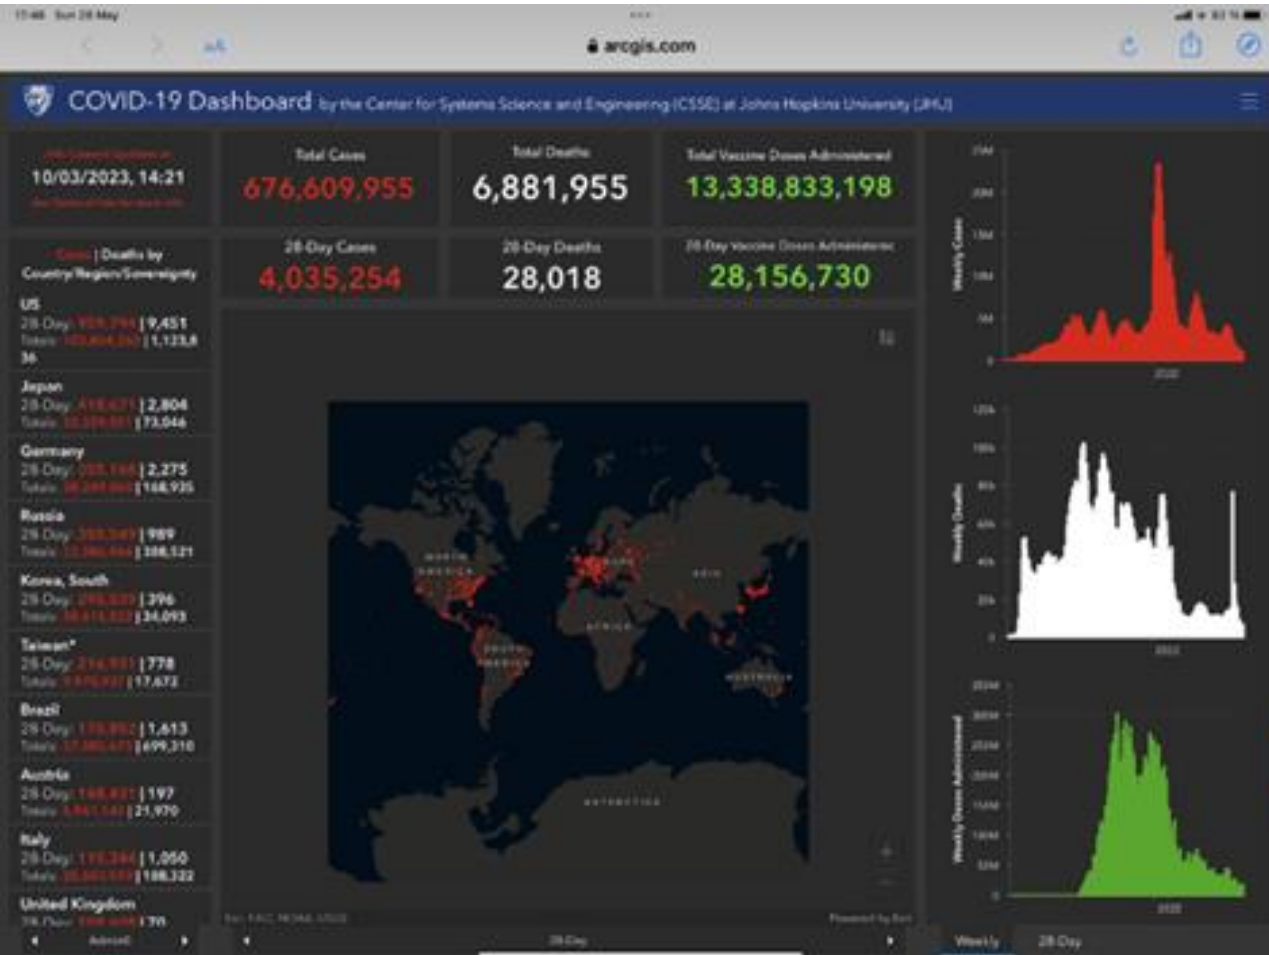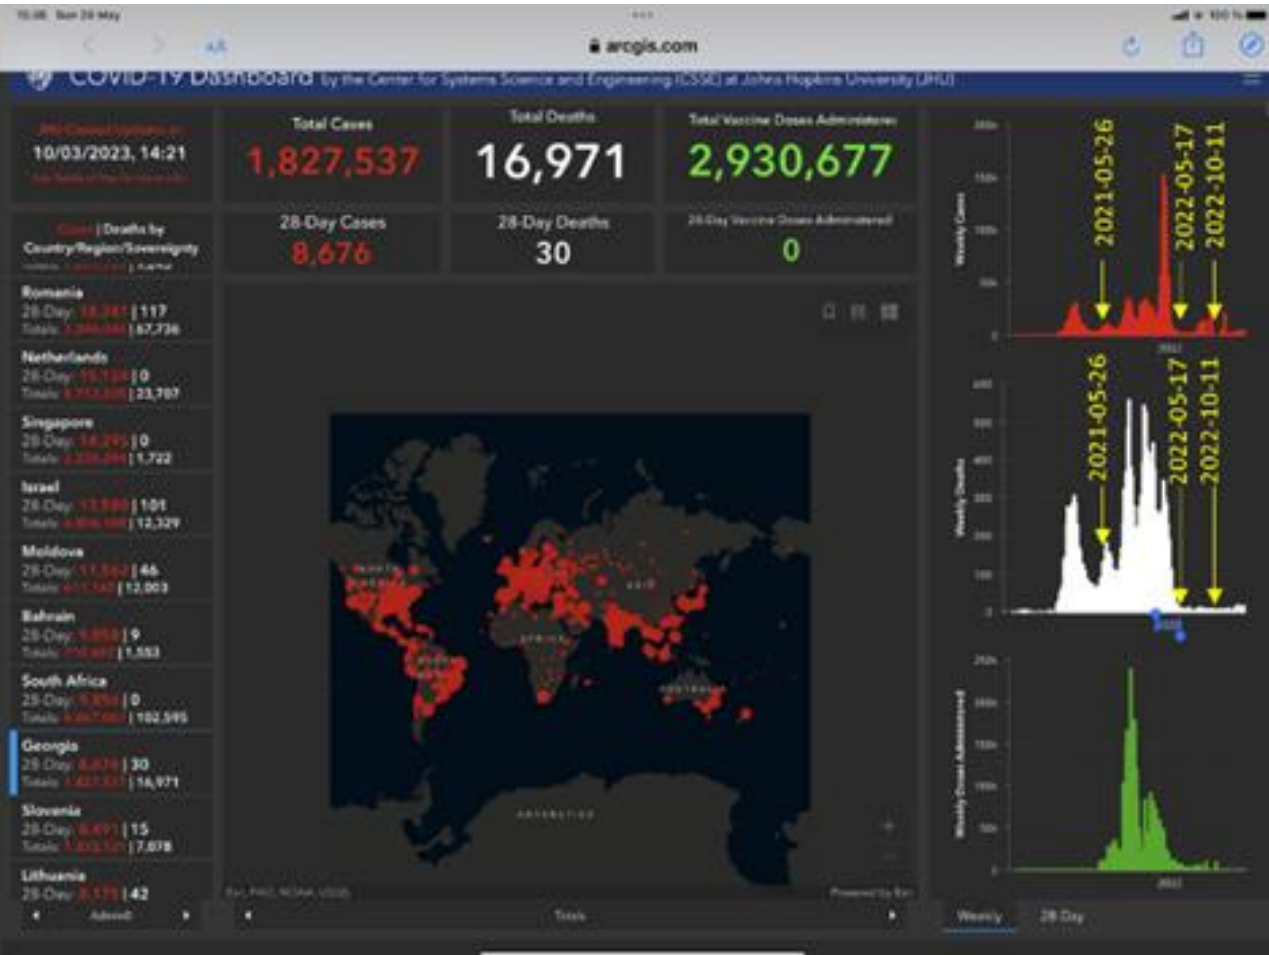

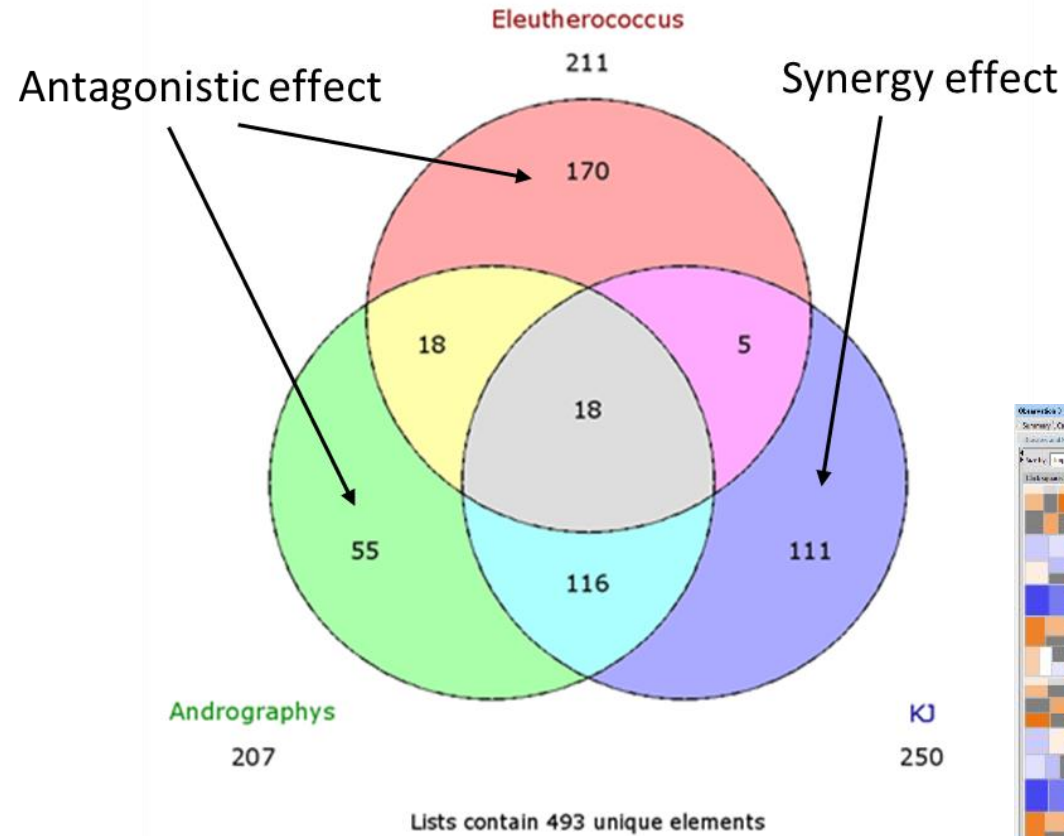

# Conditional “biological signatures” of Andrographis, Eleutherococcus and their combination Kan Jang

The color-coded heat-maps identify **diseases and functions** that are expected to **increase** or **decrease**.

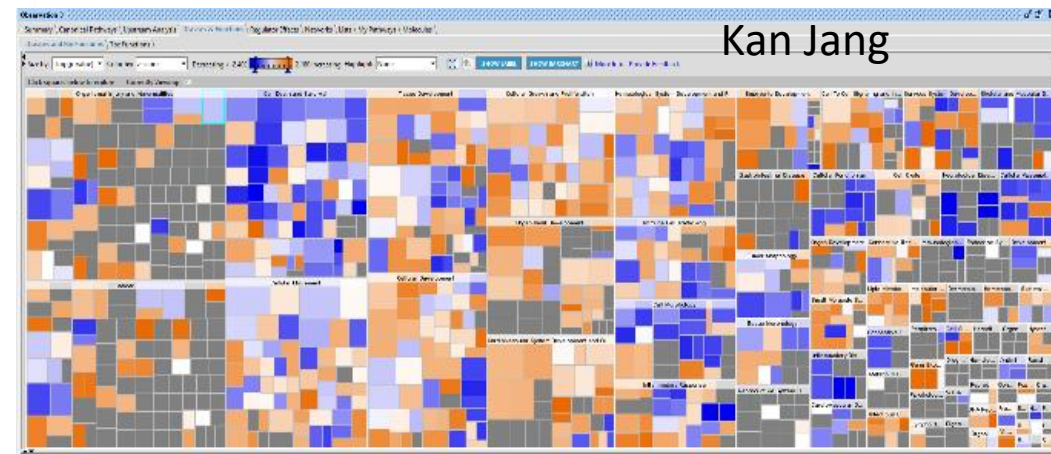

- Diseases or Functions**
- antigen presentation
  - clearance of virus
  - antiviral response of myeloid cells
  - emotional behavior
  - locomotion
  - active avoidance response
  - sexual receptivity
  - aggressive behavior
  - appetite, etc.

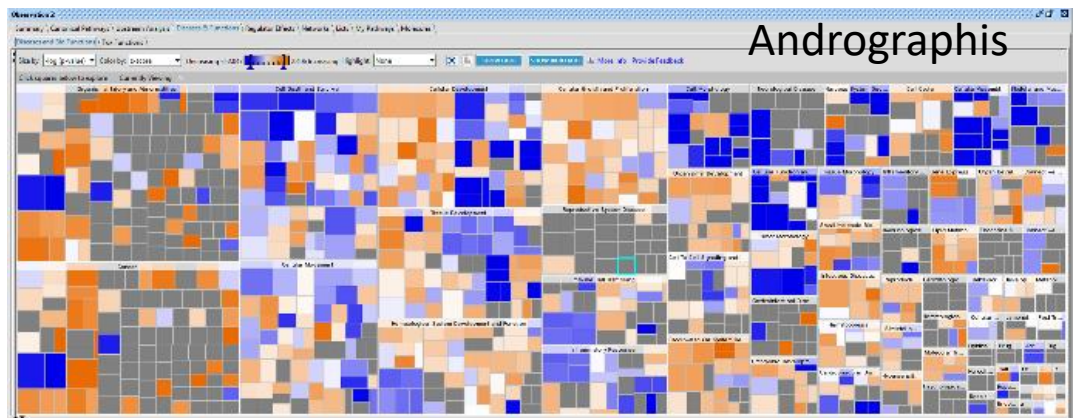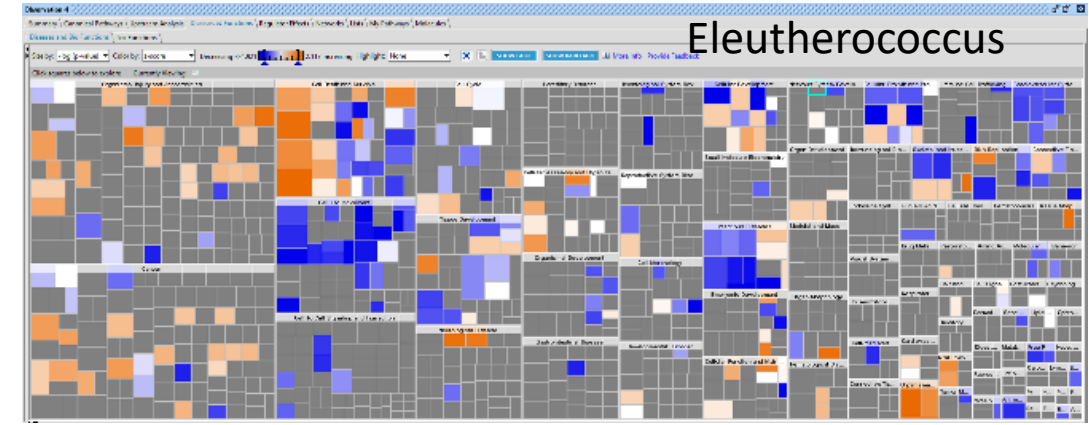

### Direct antiviral effect

- Effects on viral life cycle in infected host cells – targets preventing the virus RNA synthesis and replication
- inhibiting virus structural proteins
- Viricidal effects

### Anti-inflammatory activity

- Inhibition of NFkB mediated signaling
- Inhibition of PLA2, arachidonic acid release and metabolism
- Inhibition of nitric oxide generation

## Andrographis Eleutherococcus

### Modulation of the immune response

- Increased expression of defensins peptides,
- Increased expression of pathogen pattern recognition proteins - TLRs,
- Increased expression of interferons,
- Inhibition of IL-6, IL-1 $\beta$ , IL-10, TNF release,
- Inhibition of NFkB
- Activation natural killer cells,
- Activation of phagocytosing cells,
- Activation of T- and B - lymphocytes
- Activation of melatonin signaling

### Detoxification and reparation of oxidative stress induced damages in compromised cells

- Activation of NRF2-signaling pathway proteins (KEAP1)
- Production of Phases I,II metabolizing and antioxidant enzymes : glutathione S-transferase (GST), NAD(P)H quinone oxidoreductase 1 (NQO1) , superoxide dismutase (SOD), and heme oxygenase 1 (HO1).
- Molecular chaperons Hsp70 mediated cytoprotecting, and repairing processes
- Activation of melatonin signaling pathway

*Eleutherococcus senticosus*  
(Rupr. and Maxim.) Maxim.

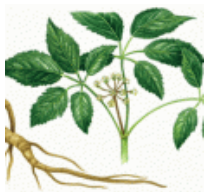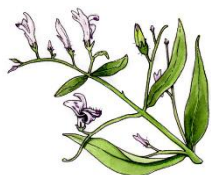

*Andrographis paniculata*  
(Burm. f.) Nees

Placebo.

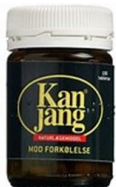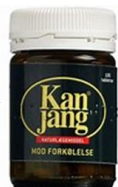

100 patients  
Completed study

The overall clinical effectiveness:  
Kan Jang : Placebo = 3.84

Number patients  
needed to treat = 8

140 patients  
randomly allocated  
to Kan Jang or  
placebo

Randomization  
masking/blinding

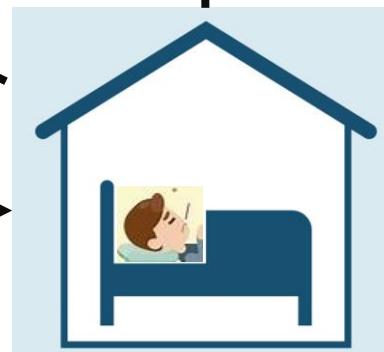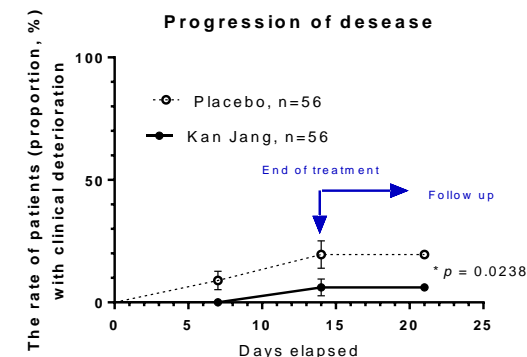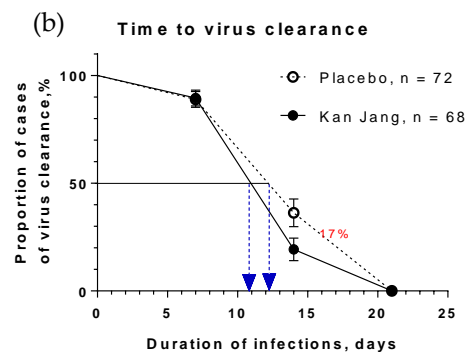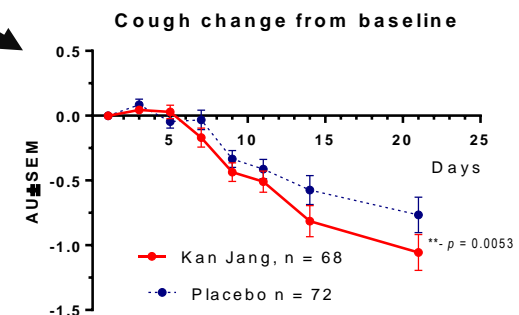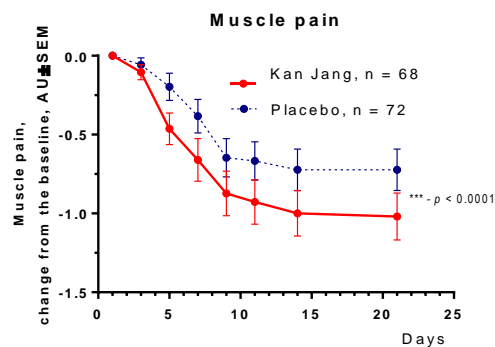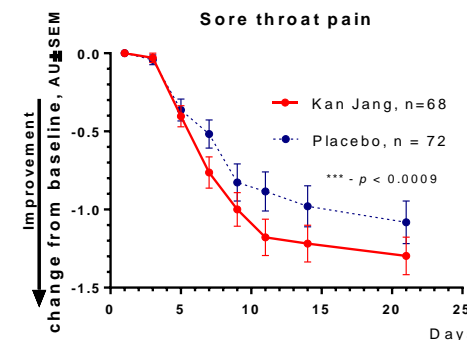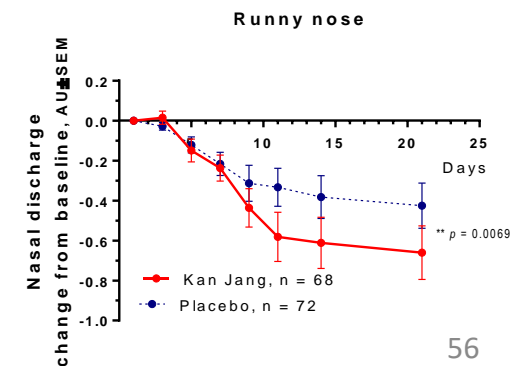

# Summary of the results

Kan Jang significantly ameliorates the overall recovery rate by decreasing the following:

- the rate of cases turning to severe,
- negative conversion rate of SARS CoV-2 virus detection.

That is accompanied with decreasing the duration of sick days at the clinic or home compared with the placebo group.

Disappearance rate of inflammatory symptom in the Kan Jang group was significantly improved compared with the placebo group, including:

| Beneficial effect of Kan Jang | <ul style="list-style-type: none"><li>• Severity of Respiratory symptoms - Wisconsin URS score</li><li>• Severity of Cough</li><li>• Severity of Sore throat pain</li><li>• Severity of Runny nose</li><li>• Severity of Muscle soreness</li><li>• Loss of smell</li><li>• Physical activity</li><li>• Workout</li></ul> | No effect on | <ul style="list-style-type: none"><li>• cognitive functions (attention and memory)</li><li>• quality of life score</li><li>• inflammatory markers D-dimer and c reactive protein</li><li>• time to normalization of body temperature</li></ul> |
|-------------------------------|--------------------------------------------------------------------------------------------------------------------------------------------------------------------------------------------------------------------------------------------------------------------------------------------------------------------------|--------------|------------------------------------------------------------------------------------------------------------------------------------------------------------------------------------------------------------------------------------------------|
|                               | <ul style="list-style-type: none"><li>• IL6 - only in the subgroup of 86 patients with moderate symptoms, but the effect was statistically insignificant in the sample size of 140 patients with mild to moderate symptoms of COVID-19</li></ul>                                                                         |              | <ul style="list-style-type: none"><li>• severity of Fatigue</li><li>• severity of Headache</li></ul>                                                                                                                                           |
|                               |                                                                                                                                                                                                                                                                                                                          |              |                                                                                                                                                                                                                                                |
|                               |                                                                                                                                                                                                                                                                                                                          |              |                                                                                                                                                                                                                                                |
|                               |                                                                                                                                                                                                                                                                                                                          |              |                                                                                                                                                                                                                                                |
|                               |                                                                                                                                                                                                                                                                                                                          |              |                                                                                                                                                                                                                                                |
|                               |                                                                                                                                                                                                                                                                                                                          |              |                                                                                                                                                                                                                                                |
|                               |                                                                                                                                                                                                                                                                                                                          |              |                                                                                                                                                                                                                                                |
|                               |                                                                                                                                                                                                                                                                                                                          |              |                                                                                                                                                                                                                                                |
|                               |                                                                                                                                                                                                                                                                                                                          |              |                                                                                                                                                                                                                                                |
