# Supplementary material
Source: MDPI journal article supplement (https://www.mdpi.com/1424-8247/16/9/1196)
Supplement: s1 [file s1]

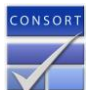

## CONSORT 2010 checklist

| Section/Topic                    | Item No | Checklist item                                                                                                                                                                                  | Reported on page No |
|----------------------------------|---------|-------------------------------------------------------------------------------------------------------------------------------------------------------------------------------------------------|---------------------|
| <b>Title and abstract</b>        |         |                                                                                                                                                                                                 |                     |
|                                  | 1a      | Identification as a randomized trial in the title                                                                                                                                               | 1                   |
|                                  | 1b      | Structured summary of trial design, methods, results, and conclusions (for specific guidance, see CONSORT for abstracts)                                                                        | 1                   |
| <b>Introduction</b>              |         |                                                                                                                                                                                                 |                     |
| Background and objectives        | 2a      | Scientific background and explanation of the rationale                                                                                                                                          | 2,3 Figure 1        |
|                                  | 2b      | Specific objectives or hypotheses                                                                                                                                                               | 3,4 Figures 2,3     |
| <b>Methods</b>                   |         |                                                                                                                                                                                                 |                     |
| Trial design                     | 3a      | Description of trial design (such as parallel, factorial), including allocation ratio                                                                                                           | 14, Figure 4        |
|                                  | 3b      | Important changes to methods after trial commencement (such as eligibility criteria), with reasons                                                                                              | n/a                 |
| Participants                     | 4a      | Eligibility criteria for participants                                                                                                                                                           | 15,16               |
|                                  | 4b      | Settings and locations where the data were collected                                                                                                                                            | 14                  |
| Interventions                    | 5       | The interventions for each group with sufficient details to allow replication, including how and when they were actually administered                                                           | 14                  |
| Outcomes                         | 6a      | Completely defined pre-specified primary and secondary outcome measures, including how and when they were assessed                                                                              | 17,18, Table 2      |
|                                  | 6b      | Any changes to trial outcomes after the trial commenced, with reasons                                                                                                                           | n/a                 |
| Sample size                      | 7a      | How sample size was determined                                                                                                                                                                  | 14, Ref 18          |
|                                  | 7b      | When applicable, explanation of any interim analyses and stopping guidelines                                                                                                                    | Ref 18              |
| <b>Randomization:</b>            |         |                                                                                                                                                                                                 |                     |
| Sequence generation              | 8a      | The method used to generate the random allocation sequence                                                                                                                                      | 16,17               |
|                                  | 8b      | Type of randomization; details of any restriction (such as blocking and block size)                                                                                                             | 17                  |
| Allocation concealment mechanism | 9       | The mechanism used to implement the random allocation sequence (such as sequentially numbered containers), describing any steps taken to conceal the sequence until interventions were assigned | 17                  |
| Implementation                   | 10      | Who generated the random allocation sequence, who enrolled participants, and who assigned participants to interventions?                                                                        | 17                  |
| Blinding                         | 11a     | If done, who was blinded after assignment to interventions (for example, participants, care providers, those                                                                                    | 17                  |

|                                                      |     |                                                                                                                                                   |                         |
|------------------------------------------------------|-----|---------------------------------------------------------------------------------------------------------------------------------------------------|-------------------------|
|                                                      |     | assessing outcomes), and how                                                                                                                      |                         |
| Statistical methods                                  | 11b | If relevant, a description of the similarity of interventions                                                                                     | 17                      |
|                                                      | 12a | Statistical methods used to compare groups for primary and secondary outcomes                                                                     | 14, Ref 18              |
|                                                      | 12b | Methods for additional analyses, such as subgroup analyses and adjusted analyses                                                                  | 14, Ref 18              |
| <b>Results</b>                                       |     |                                                                                                                                                   |                         |
| Participant flow (a diagram is strongly recommended) | 13a | For each group, the number of participants who were randomly assigned received the intended treatment and was analyzed for the primary outcome.   | 4, Figure 4, Table 1    |
|                                                      | 13b | For each group, losses and exclusions after randomization, together with reasons                                                                  | 4, Figure 4             |
| Recruitment                                          | 14a | Dates defining the periods of recruitment and follow-up                                                                                           | 4,14, Figure 3          |
|                                                      | 14b | Why the trial ended or was stopped                                                                                                                | 4,14, Figure 3          |
| Baseline data                                        | 15  | A table showing baseline demographic and clinical characteristics for each group                                                                  | Table 1                 |
| Numbers analyzed                                     | 16  | For each group, the number of participants (denominator) included in each analysis and whether the analysis was by originally assigned groups     | Figures 5-13            |
| Outcomes and estimation                              | 17a | For each primary and secondary outcome, results for each group, and the estimated effect size and its precision (such as 95% confidence interval) | Figures 5-13 pages 6-12 |
|                                                      | 17b | For binary outcomes, the presentation of both absolute and relative effect sizes is recommended.                                                  | Pages 6-12              |
| Ancillary analyses                                   | 18  | Results of any other analyses performed, including subgroup analyses and adjusted analyses, distinguishing pre-specified from exploratory         | n/a                     |
| Harms                                                | 19  | All important harms or unintended effects in each group (for specific guidance, see CONSORT for harms)                                            | n/a                     |
| <b>Discussion</b>                                    |     |                                                                                                                                                   |                         |
| Limitations                                          | 20  | Trial limitations, addressing sources of potential bias, imprecision, and, if relevant, multiplicity of analyses                                  | 13,14                   |
| Generalisability                                     | 21  | Generalisability (external validity, applicability) of the trial findings                                                                         | 12,13,18                |
| Interpretation                                       | 22  | Interpretation consistent with results, balancing benefits and harms, and considering other relevant evidence                                     | 12,13                   |
| <b>Other information</b>                             |     |                                                                                                                                                   |                         |
| Registration                                         | 23  | Registration number and name of trial registry                                                                                                    | 14                      |
| Protocol                                             | 24  | Where the full trial protocol can be accessed, if available                                                                                       | 14                      |
| Funding                                              | 25  | Sources of funding and other support (such as a supply of drugs), the role of funders                                                             | 18                      |
